# Supplementary material for: Hsp90α forms condensate engaging client proteins with RG motif repeats
Source: Royal Society of Chemistry journal article supplement (doi:10.1039/d4sc00267a), 2024-01-01
Supplement: d4sc00267a1.xlsx [file d4sc00267a1.xlsx]

## Sheet: Sheet3
Majority protein IDs	FC	p value
sp|O00159|MYO1C_HUMAN	2.14668	0.0020941
sp|O00203|AP3B1_HUMAN	2.03006	0.00374066
sp|O00232|PSD12_HUMAN	1.3627	0.00855275
sp|O00303|EIF3F_HUMAN	1.24186	0.0128483
sp|O00425|IF2B3_HUMAN	1.48533	0.0152703
sp|O00429|DNM1L_HUMAN	1.6435	0.00841083
sp|O00487|PSDE_HUMAN	1.34466	0.0236787
sp|O00541|PESC_HUMAN	5.27412	0.0492939
sp|O00571|DDX3X_HUMAN;sp|O15523|DDX3Y_HUMAN	1.69126	0.00358677
sp|O14579|COPE_HUMAN	1.88271	0.00239333
sp|O14949|QCR8_HUMAN	1.56431	0.0398607
sp|O14980|XPO1_HUMAN	1.83812	0.028909
sp|O15031|PLXB2_HUMAN	5.14849	0.0464573
sp|O15042|SR140_HUMAN	1.68827	0.00415983
sp|O15260|SURF4_HUMAN	1.67275	0.00019154
sp|O15371|EIF3D_HUMAN	1.91355	0.000255289
sp|O43175|SERA_HUMAN	1.86169	1.00286e-05
sp|O43242|PSMD3_HUMAN	1.97372	0.00170356
sp|O43390|HNRPR_HUMAN	1.65274	0.00409705
sp|O43592|XPOT_HUMAN	1.83443	0.0145133
sp|O43684|BUB3_HUMAN	1.57536	0.00791309
sp|O43776|SYNC_HUMAN	1.72558	6.15492e-05
sp|O43809|CPSF5_HUMAN	1.55035	0.0114246
sp|O60610|DIAP1_HUMAN	1.55722	0.000455561
sp|O60684|IMA7_HUMAN;sp|O15131|IMA6_HUMAN	1.62377	0.0199619
sp|O60701|UGDH_HUMAN	1.39949	0.000133654
sp|O60716|CTND1_HUMAN	7.52182	0.0216618
sp|O60832|DKC1_HUMAN	5.90286	0.0322649
sp|O60841|IF2P_HUMAN	1.81502	0.0200869
sp|O60884|DNJA2_HUMAN	1.42075	0.00735105
sp|O75369|FLNB_HUMAN	1.73923	0.00369669
sp|O75475|PSIP1_HUMAN	3.9929	0.0155019
sp|O75530|EED_HUMAN	1.6446	0.00197982
sp|O75533|SF3B1_HUMAN	1.72037	0.0272419
sp|O75534|CSDE1_HUMAN	1.98414	0.0154077
sp|O75643|U520_HUMAN	1.77735	0.000378862
sp|O75694|NU155_HUMAN	1.57764	0.00153826
sp|O75964|ATP5L_HUMAN	1.18719	0.00415629
sp|O76021|RL1D1_HUMAN	1.53378	0.00852504
sp|O76031|CLPX_HUMAN	6.29721	0.0334765
sp|O76094|SRP72_HUMAN	4.05678	0.0130336
sp|O94776|MTA2_HUMAN	2.24475	0.0079794
sp|O94906|PRP6_HUMAN	9.93261	0.00436655
sp|O95163|ELP1_HUMAN	11.8467	0.00821251
sp|O95232|LC7L3_HUMAN	2.19117	0.0362073
sp|O95373|IPO7_HUMAN	1.25679	0.00182096
sp|O95433|AHSA1_HUMAN	2.41664	0.00112706
sp|O95573|ACSL3_HUMAN	3.51986	0.0108805
sp|O95782|AP2A1_HUMAN	1.78291	0.000943068
sp|O95816|BAG2_HUMAN	2.36008	3.27975e-05
sp|O95831|AIFM1_HUMAN	2.00876	0.00131003
sp|P00533|EGFR_HUMAN	2.15094	0.012681
sp|P00966|ASSY_HUMAN	2.02335	2.22559e-05
sp|P02545|LMNA_HUMAN	2.01976	0.00143391
sp|P04792|HSPB1_HUMAN	1.41956	0.000291265
sp|P04843|RPN1_HUMAN	1.46231	0.00147337
sp|P04844|RPN2_HUMAN	1.46839	0.0288232
sp|P05141|ADT2_HUMAN	1.41524	0.0160674
sp|P05198|IF2A_HUMAN	2.05749	0.0267745
sp|P05387|RLA2_HUMAN	1.74931	0.00660963
sp|P05388|RLA0_HUMAN;sp|Q8NHW5|RLA0L_HUMAN	1.63815	0.00305874
sp|P05783|K1C18_HUMAN	1.91881	0.000419657
sp|P05787|K2C8_HUMAN;CON__P05787	2.14139	0.00537269
sp|P06493|CDK1_HUMAN	1.85165	0.0070102
sp|P06576|ATPB_HUMAN	1.19983	0.0142107
sp|P06748|NPM_HUMAN	1.79072	0.00134756
sp|P07355|ANXA2_HUMAN;sp|A6NMY6|AXA2L_HUMAN	1.17375	0.0295343
sp|P07437|TBB5_HUMAN	1.58679	0.00183282
sp|P07814|SYEP_HUMAN	1.59678	0.000125843
sp|P07910|HNRPC_HUMAN;sp|P0DMR1|HNRC4_HUMAN;sp|O60812|HNRC1_HUMAN;sp|B7ZW38|HNRC3_HUMAN;sp|B2RXH8|HNRC2_HUMAN	1.7354	0.00245844
sp|P08237|PFKAM_HUMAN	1.74917	0.00270673
sp|P08559|ODPA_HUMAN	1.6565	0.0259414
sp|P08621|RU17_HUMAN	1.79799	0.00680805
sp|P08670|VIME_HUMAN	2.05446	0.00159792
sp|P08729|K2C7_HUMAN;CON__Q3KNV1;CON__P08729	1.87432	0.00195225
sp|P09012|SNRPA_HUMAN	1.24736	0.0217252
sp|P09651|ROA1_HUMAN;sp|Q32P51|RA1L2_HUMAN	1.32812	0.00113869
sp|P09661|RU2A_HUMAN	1.64371	0.000310483
sp|P09874|PARP1_HUMAN	1.86415	0.00171386
sp|P0DMV9|HS71B_HUMAN;sp|P0DMV8|HS71A_HUMAN	1.28492	0.0050708
sp|P10412|H14_HUMAN	6.39389	0.0262769
sp|P10515|ODP2_HUMAN	1.60905	0.00620957
sp|P10620|MGST1_HUMAN	1.46815	0.0424761
sp|P11021|BIP_HUMAN	1.17461	0.00113183
sp|P11142|HSP7C_HUMAN	1.25742	0.00624809
sp|P11172|UMPS_HUMAN	1.49527	0.0300876
sp|P11216|PYGB_HUMAN	4.23605	0.0253098
sp|P11387|TOP1_HUMAN	1.96958	0.00337526
sp|P11498|PYC_HUMAN	2.24182	0.00109163
sp|P11586|C1TC_HUMAN	1.79216	0.000712856
sp|P11908|PRPS2_HUMAN	3.03525	0.0451703
sp|P12081|HARS1_HUMAN	1.61959	0.00370536
sp|P12236|ADT3_HUMAN	1.50772	0.00636282
sp|P12268|IMDH2_HUMAN	1.90947	0.0061918
sp|P12270|TPR_HUMAN	3.76979	0.000475965
sp|P12956|XRCC6_HUMAN	1.54279	3.4077e-05
sp|P13010|XRCC5_HUMAN	1.22312	1.53407e-05
sp|P13639|EF2_HUMAN	1.48115	0.00117217
sp|P14618|KPYM_HUMAN	1.33001	0.000368866
sp|P14678|RSMB_HUMAN;sp|P63162|RSMN_HUMAN	2.10323	0.000909656
sp|P14866|HNRPL_HUMAN	1.65541	5.28566e-05
sp|P14868|SYDC_HUMAN	1.66406	0.00787821
sp|P15880|RS2_HUMAN	1.7449	0.00641532
sp|P15924|DESP_HUMAN	1.91459	0.00108666
sp|P16401|H15_HUMAN	1.41559	0.000293935
sp|P16403|H12_HUMAN;sp|P16402|H13_HUMAN	2.03091	0.00198405
sp|P16615|AT2A2_HUMAN	1.93451	0.00449764
sp|P17480|UBF1_HUMAN	7.42136	0.0098709
sp|P17844|DDX5_HUMAN	1.84856	0.00123245
sp|P17858|PFKAL_HUMAN	1.63394	0.00296322
sp|P17980|PRS6A_HUMAN	1.79626	0.000469842
sp|P17987|TCPA_HUMAN	1.70147	0.000260095
sp|P18077|RL35A_HUMAN	1.55664	0.0126063
sp|P18085|ARF4_HUMAN	2.03791	0.0253949
sp|P18124|RL7_HUMAN	1.5327	0.0155701
sp|P18583|SON_HUMAN	1.43169	0.0128531
sp|P18621|RL17_HUMAN	1.62494	0.00141913
sp|P19338|NUCL_HUMAN	1.85913	5.38413e-06
sp|P19525|E2AK2_HUMAN	6.36389	0.0291373
sp|P20042|IF2B_HUMAN	1.60193	0.00726459
sp|P20700|LMNB1_HUMAN	2.05335	0.00337625
sp|P21333|FLNA_HUMAN	1.7445	0.000253428
sp|P22102|PUR2_HUMAN	1.57055	0.000846137
sp|P22234|PUR6_HUMAN	1.50977	0.011392
sp|P22626|ROA2_HUMAN	1.54567	0.00139615
sp|P22695|QCR2_HUMAN	1.66416	0.0117615
sp|P23246|SFPQ_HUMAN	1.76801	0.000335008
sp|P23396|RS3_HUMAN	2.04127	0.00351375
sp|P23588|IF4B_HUMAN	1.25554	0.0350903
sp|P24534|EF1B_HUMAN	3.00269	0.00491021
sp|P24539|AT5F1_HUMAN	1.78118	0.0125681
sp|P24666|PPAC_HUMAN	1.53732	0.0478182
sp|P24941|CDK2_HUMAN	3.05014	0.0342709
sp|P25205|MCM3_HUMAN	1.63136	0.00171554
sp|P25685|DNJB1_HUMAN	1.81168	0.0037269
sp|P25705|ATPA_HUMAN	1.72758	0.00415405
sp|P25789|PSA4_HUMAN	1.48607	0.04749
sp|P26196|DDX6_HUMAN	2.27238	0.0187523
sp|P26368|U2AF2_HUMAN	1.17933	0.0206663
sp|P26373|RL13_HUMAN	1.3559	0.0031246
sp|P26639|SYTC_HUMAN	1.57094	0.00188094
sp|P26640|SYVC_HUMAN	1.55564	0.000469138
sp|P26641|EF1G_HUMAN	1.50895	1.325e-05
sp|P27635|RL10_HUMAN	1.53473	1.25882e-05
sp|P27708|PYR1_HUMAN	1.79854	0.011515
sp|P27816|MAP4_HUMAN	1.86002	0.00117301
sp|P28070|PSB4_HUMAN	1.19598	0.0396242
sp|P28288|ABCD3_HUMAN	2.10383	0.0126884
sp|P28331|NDUS1_HUMAN	1.73928	0.00862284
sp|P29692|EF1D_HUMAN	1.72707	0.00585825
sp|P30050|RL12_HUMAN	2.24413	0.000152243
sp|P31327|CPSM_HUMAN	1.75942	0.000364302
sp|P31689|DNJA1_HUMAN	1.87329	0.000123799
sp|P31943|HNRH1_HUMAN	1.39083	0.000231643
sp|P32322|P5CR1_HUMAN	1.60486	0.00282435
sp|P32969|RL9_HUMAN	1.70057	0.00993251
sp|P33176|KINH_HUMAN	1.6903	0.0354252
sp|P33991|MCM4_HUMAN	2.34786	0.000373823
sp|P33992|MCM5_HUMAN	1.75235	0.00227997
sp|P33993|MCM7_HUMAN	1.72586	6.27615e-05
sp|P34897|GLYM_HUMAN	1.67734	0.0256689
sp|P35232|PHB1_HUMAN	1.75145	0.00622122
sp|P35268|RL22_HUMAN	1.66234	0.00471632
sp|P35573|GDE_HUMAN	3.30723	0.024538
sp|P35579|MYH9_HUMAN	1.93543	0.00294101
sp|P35606|COPB2_HUMAN	1.48254	0.0233208
sp|P35658|NU214_HUMAN	5.83361	0.0234567
sp|P35659|DEK_HUMAN	1.81788	0.00067621
sp|P35998|PRS7_HUMAN	4.06195	0.00582963
sp|P36542|ATPG_HUMAN	1.60277	0.0101503
sp|P36578|RL4_HUMAN	1.56917	0.00751623
sp|P36776|LONM_HUMAN	1.32339	0.0113151
sp|P37108|SRP14_HUMAN	1.53272	0.0410777
sp|P38159|RBMX_HUMAN;sp|Q96E39|RMXL1_HUMAN	1.99938	0.00387578
sp|P38646|GRP75_HUMAN	1.24327	0.0115475
sp|P38919|IF4A3_HUMAN	1.47656	0.00677935
sp|P39023|RL3_HUMAN	1.72311	0.00014573
sp|P39748|FEN1_HUMAN	3.6555	0.0189994
sp|P40227|TCPZ_HUMAN	2.09033	0.00199653
sp|P40429|RL13A_HUMAN	1.92525	0.00467206
sp|P40763|STAT3_HUMAN	1.5566	0.000909765
sp|P41091|IF2G_HUMAN;sp|Q2VIR3|IF2GL_HUMAN	1.8289	0.0132679
sp|P41240|CSK_HUMAN;sp|P42679|MATK_HUMAN	5.12244	0.0390033
sp|P41252|SYIC_HUMAN	1.5103	0.000650737
sp|P42166|LAP2A_HUMAN	2.01965	0.00652075
sp|P42167|LAP2B_HUMAN	1.71836	0.00816508
sp|P42285|MTREX_HUMAN	1.22793	0.0360486
sp|P42704|LPPRC_HUMAN	1.30679	0.00368338
sp|P42766|RL35_HUMAN	1.90576	0.000398761
sp|P43243|MATR3_HUMAN	1.73578	0.000148959
sp|P43246|MSH2_HUMAN	2.25116	0.0296497
sp|P43686|PRS6B_HUMAN	2.06854	0.0194662
sp|P46013|KI67_HUMAN	5.2819	0.000615451
sp|P46063|RECQ1_HUMAN	1.57054	0.0158649
sp|P46087|NOP2_HUMAN	1.84736	0.0108595
sp|P46459|NSF_HUMAN	5.4337	0.0465209
sp|P46776|RL27A_HUMAN	1.21866	0.0174397
sp|P46777|RL5_HUMAN	1.69003	0.00640656
sp|P46778|RL21_HUMAN	1.52991	0.0076183
sp|P46779|RL28_HUMAN	1.5866	1.28647e-05
sp|P46781|RS9_HUMAN	1.74487	0.0061717
sp|P46783|RS10_HUMAN	1.28549	0.000317798
sp|P46977|STT3A_HUMAN	1.50711	0.000171302
sp|P47897|SYQ_HUMAN	1.77224	0.0133372
sp|P48047|ATPO_HUMAN	1.39101	0.0475613
sp|P48444|COPD_HUMAN	6.12203	0.0121097
sp|P48643|TCPE_HUMAN	1.36414	0.00754159
sp|P49207|RL34_HUMAN	1.33158	0.018913
sp|P49368|TCPG_HUMAN	1.76775	4.58716e-05
sp|P49643|PRI2_HUMAN	1.31929	0.00199982
sp|P49736|MCM2_HUMAN	1.34176	0.012343
sp|P49792|RBP2_HUMAN	1.79254	0.000789293
sp|P50454|SERPH_HUMAN	1.7433	0.00644682
sp|P50570|DYN2_HUMAN	1.56296	0.00291718
sp|P50579|MAP2_HUMAN	1.40446	0.0160731
sp|P50914|RL14_HUMAN	1.43505	0.0230957
sp|P50991|TCPD_HUMAN	2.00381	0.00250166
sp|P51398|RT29_HUMAN	4.45463	0.0172366
sp|P51532|SMCA4_HUMAN	1.46821	0.00448012
sp|P51571|SSRD_HUMAN	1.56805	0.00796632
sp|P51610|HCFC1_HUMAN	2.91771	0.0437624
sp|P51991|ROA3_HUMAN	2.1981	0.000154606
sp|P52272|HNRPM_HUMAN	1.72389	0.000461224
sp|P52292|IMA1_HUMAN	1.63739	0.000530971
sp|P52701|MSH6_HUMAN	2.48141	0.00444349
sp|P52948|NUP98_HUMAN	1.36804	0.0422786
sp|P53618|COPB_HUMAN	1.71533	0.000763506
sp|P53621|COPA_HUMAN	1.54395	0.000673299
sp|P53999|TCP4_HUMAN	2.98193	0.000609647
sp|P54136|SYRC_HUMAN	1.92153	0.000536282
sp|P54577|SYYC_HUMAN	2.71001	8.26182e-06
sp|P54886|P5CS_HUMAN	1.68139	0.0073855
sp|P55060|XPO2_HUMAN	1.75533	0.00331921
sp|P55265|DSRAD_HUMAN	1.84425	0.000121673
sp|P55735|SEC13_HUMAN	1.45657	0.0299683
sp|P55769|NH2L1_HUMAN	1.35978	0.0435033
sp|P55795|HNRH2_HUMAN	1.57907	0.006312
sp|P56192|SYMC_HUMAN	1.65439	0.00118223
sp|P57740|NU107_HUMAN	6.23695	0.017054
sp|P58107|EPIPL_HUMAN	1.63785	0.00298944
sp|P59998|ARPC4_HUMAN	1.77584	0.00443074
sp|P60660|MYL6_HUMAN	1.45233	0.00131173
sp|P60842|IF4A1_HUMAN	1.41342	0.000336115
sp|P60866|RS20_HUMAN	2.54802	0.0095201
sp|P60891|PRPS1_HUMAN	1.179	0.0439247
sp|P61160|ARP2_HUMAN	1.50336	0.0351529
sp|P61163|ACTZ_HUMAN	1.46422	0.0263301
sp|P61221|ABCE1_HUMAN	1.54717	0.0116591
sp|P61247|RS3A_HUMAN	1.65867	0.0025271
sp|P61254|RL26_HUMAN	1.5638	0.0111264
sp|P61313|RL15_HUMAN	1.50379	0.00945952
sp|P61353|RL27_HUMAN	1.94311	0.00063852
sp|P61513|RL37A_HUMAN	1.5582	0.00430159
sp|P61619|S61A1_HUMAN	1.59243	9.0261e-05
sp|P61978|HNRPK_HUMAN	1.27166	0.0112076
sp|P62081|RS7_HUMAN	1.86467	0.000984207
sp|P62140|PP1B_HUMAN	1.21311	0.0438058
sp|P62191|PRS4_HUMAN	2.56868	0.000231327
sp|P62195|PRS8_HUMAN	1.89681	0.00468259
sp|P62241|RS8_HUMAN	1.72665	0.00104031
sp|P62249|RS16_HUMAN	1.56457	0.00230755
sp|P62263|RS14_HUMAN	1.60204	0.00442333
sp|P62266|RS23_HUMAN	1.21996	0.000509303
sp|P62277|RS13_HUMAN	1.79477	0.00182991
sp|P62280|RS11_HUMAN	1.54416	0.00142813
sp|P62306|RUXF_HUMAN	1.43127	0.0316713
sp|P62314|SMD1_HUMAN	1.8392	0.00194828
sp|P62318|SMD3_HUMAN	1.52505	0.00530943
sp|P62333|PRS10_HUMAN	1.67438	0.0066594
sp|P62424|RL7A_HUMAN	1.47334	0.00278626
sp|P62495|ERF1_HUMAN	1.58139	0.00504626
sp|P62701|RS4X_HUMAN	1.58893	0.00229908
sp|P62750|RL23A_HUMAN	1.71525	0.00139574
sp|P62753|RS6_HUMAN	1.93323	0.00023638
sp|P62805|H4_HUMAN	1.70614	0.00042902
sp|P62820|RAB1A_HUMAN	1.28638	0.00350111
sp|P62826|RAN_HUMAN	1.62334	0.000269951
sp|P62829|RL23_HUMAN	1.58481	0.0143912
sp|P62847|RS24_HUMAN	1.68856	0.0103373
sp|P62861|RS30_HUMAN	6.86524	0.0192639
sp|P62888|RL30_HUMAN	1.6876	0.000343861
sp|P62899|RL31_HUMAN	1.75619	0.0020008
sp|P62906|RL10A_HUMAN	1.7655	0.00115786
sp|P62910|RL32_HUMAN	1.40921	0.0107789
sp|P62913|RL11_HUMAN	1.31915	0.0155342
sp|P62917|RL8_HUMAN	1.57077	0.00162198
sp|P63010|AP2B1_HUMAN	1.45375	0.000508416
sp|P63173|RL38_HUMAN	1.60303	0.000109025
sp|P63244|RACK1_HUMAN	1.20698	0.00960753
sp|P67809|YBOX1_HUMAN	1.9864	0.000218609
sp|P67812|SC11A_HUMAN	4.77432	0.0487789
sp|P68104|EF1A1_HUMAN;sp|Q5VTE0|EF1A3_HUMAN	1.5209	4.06867e-05
sp|P68363|TBA1B_HUMAN	1.6839	0.000416209
sp|P68371|TBB4B_HUMAN	1.44297	4.9402e-05
sp|P68400|CSK21_HUMAN;sp|Q8NEV1|CSK23_HUMAN	7.19962	0.000615445
sp|P78344|IF4G2_HUMAN	2.30726	0.0350571
sp|P78347|GTF2I_HUMAN	1.76792	0.000509046
sp|P78527|PRKDC_HUMAN	1.68438	0.0038396
sp|P83731|RL24_HUMAN	1.45943	0.000572726
sp|P84077|ARF1_HUMAN	1.50946	0.0101975
sp|P84098|RL19_HUMAN	2.04488	0.000122134
sp|P84103|SRSF3_HUMAN	1.51268	0.00740601
sp|Q00325|MPCP_HUMAN	1.34084	0.00467962
sp|Q00341|VIGLN_HUMAN	3.03195	0.0237266
sp|Q00610|CLH1_HUMAN	1.4761	0.0243127
sp|Q00839|HNRPU_HUMAN	1.70772	0.000893136
sp|Q01081|U2AF1_HUMAN;sp|Q8WU68|U2AF4_HUMAN	1.47656	0.000695176
sp|Q01082|SPTB2_HUMAN	1.88147	0.000648518
sp|Q01130|SRSF2_HUMAN	1.39266	0.0386737
sp|Q01813|PFKAP_HUMAN	1.74516	0.00123297
sp|Q01844|EWS_HUMAN	1.43602	0.0187017
sp|Q02218|ODO1_HUMAN	1.82351	0.0010327
sp|Q02809|PLOD1_HUMAN	1.82699	0.00325632
sp|Q02878|RL6_HUMAN	1.78815	0.00238379
sp|Q04637|IF4G1_HUMAN	1.53615	0.00424725
sp|Q06124|PTN11_HUMAN	1.71036	0.00470072
sp|Q06210|GFPT1_HUMAN	2.18521	0.00015616
sp|Q07021|C1QBP_HUMAN	1.72774	0.00584137
sp|Q07065|CKAP4_HUMAN	2.04934	0.0129207
sp|Q07666|KHDR1_HUMAN	2.15891	0.00927575
sp|Q07955|SRSF1_HUMAN	1.38138	0.0238448
sp|Q08211|DHX9_HUMAN	1.73681	0.000244753
sp|Q08945|SSRP1_HUMAN	2.05546	0.000828952
sp|Q08J23|NSUN2_HUMAN	1.67724	0.00026362
sp|Q09666|AHNK_HUMAN	2.28359	0.00346134
sp|Q12792|TWF1_HUMAN	1.3088	0.0311831
sp|Q12874|SF3A3_HUMAN	1.43488	0.00977192
sp|Q12904|AIMP1_HUMAN	2.11054	0.0096762
sp|Q12905|ILF2_HUMAN	1.41467	0.00250272
sp|Q12906|ILF3_HUMAN	1.99926	0.000256052
sp|Q12931|TRAP1_HUMAN	2.12142	0.000261955
sp|Q13045|FLII_HUMAN	1.77628	0.0105696
sp|Q13148|TADBP_HUMAN	1.20829	0.0123621
sp|Q13151|ROA0_HUMAN	1.8777	0.0454811
sp|Q13155|AIMP2_HUMAN	1.59589	0.000981949
sp|Q13177|PAK2_HUMAN;sp|Q13153|PAK1_HUMAN;sp|O75914|PAK3_HUMAN	1.42523	0.0400214
sp|Q13200|PSMD2_HUMAN	1.42681	0.0119868
sp|Q13247|SRSF6_HUMAN	1.3956	0.00461588
sp|Q13310|PABP4_HUMAN	1.22581	0.0320541
sp|Q13347|EIF3I_HUMAN	1.93379	0.000357525
sp|Q13418|ILK_HUMAN	1.60636	0.00636406
sp|Q13428|TCOF_HUMAN	3.36731	0.0358775
sp|Q13435|SF3B2_HUMAN	30.5893	0.00108909
sp|Q13610|PWP1_HUMAN	1.24255	0.0301029
sp|Q13619|CUL4A_HUMAN	1.58835	0.00257047
sp|Q13813|SPTN1_HUMAN	1.7435	0.00492049
sp|Q13838|DX39B_HUMAN	1.38366	0.000727109
sp|Q14152|EIF3A_HUMAN	1.68243	0.00669923
sp|Q14157|UBP2L_HUMAN	1.78773	0.0425723
sp|Q14203|DCTN1_HUMAN	2.23658	0.0205916
sp|Q14204|DYHC1_HUMAN	1.64633	0.00381763
sp|Q14258|TRI25_HUMAN	1.60877	0.0158684
sp|Q14498|RBM39_HUMAN	1.45616	0.0150762
sp|Q14558|KPRA_HUMAN	4.97273	0.0374662
sp|Q14566|MCM6_HUMAN	1.72836	0.00398521
sp|Q14683|SMC1A_HUMAN	2.86565	0.0104023
sp|Q14839|CHD4_HUMAN	2.47569	0.000131064
sp|Q14978|NOLC1_HUMAN	1.379	0.00832758
sp|Q14980|NUMA1_HUMAN	6.01085	0.00957096
sp|Q14C86|GAPD1_HUMAN	5.32497	0.0346602
sp|Q15008|PSMD6_HUMAN	2.94008	0.00893087
sp|Q15019|SEPT2_HUMAN	2.40022	0.0085241
sp|Q15021|CND1_HUMAN	2.72715	0.000358287
sp|Q15029|U5S1_HUMAN	2.07819	0.00868801
sp|Q15046|SYK_HUMAN	1.64472	0.00130383
sp|Q15149|PLEC_HUMAN	1.88142	0.00223858
sp|Q15165|PON2_HUMAN	1.6387	0.0404493
sp|Q15233|NONO_HUMAN	1.74948	0.0021012
sp|Q15287|RNPS1_HUMAN	3.55521	0.0363288
sp|Q15365|PCBP1_HUMAN	1.4004	0.00193478
sp|Q15366|PCBP2_HUMAN	1.27817	0.00892677
sp|Q15393|SF3B3_HUMAN	1.38279	0.0277517
sp|Q15424|SAFB1_HUMAN	3.02877	0.00266888
sp|Q15459|SF3A1_HUMAN	1.76642	0.00088284
sp|Q15645|PCH2_HUMAN	1.46073	0.00119797
sp|Q15717|ELAV1_HUMAN	1.74309	0.0019989
sp|Q16181|SEPT7_HUMAN	1.6907	0.00831856
sp|Q16401|PSMD5_HUMAN	1.38736	0.0166691
sp|Q16513|PKN2_HUMAN	1.99346	0.0107983
sp|Q16630|CPSF6_HUMAN	1.64385	0.0259223
sp|Q16718|NDUA5_HUMAN	3.0959	0.0434521
sp|Q16795|NDUA9_HUMAN	1.61461	0.000526912
sp|Q16851|UGPA_HUMAN	1.96903	0.0156357
sp|Q16891|MIC60_HUMAN	2.14373	0.0071076
sp|Q27J81|INF2_HUMAN	1.73115	0.0127518
sp|Q29RF7|PDS5A_HUMAN	3.35418	0.0354326
sp|Q2NL82|TSR1_HUMAN	1.30577	0.0128286
sp|Q53GS9|SNUT2_HUMAN	3.43128	0.0095481
sp|Q58FG1|HS904_HUMAN	1.24479	0.0227814
sp|Q5JTH9|RRP12_HUMAN	1.39424	0.0168868
sp|Q5SSJ5|HP1B3_HUMAN	1.6331	0.000425005
sp|Q5T4S7|UBR4_HUMAN	2.02085	0.0125079
sp|Q5VYK3|ECM29_HUMAN	1.82162	0.00964314
sp|Q6DD88|ATLA3_HUMAN	2.88864	0.00466009
sp|Q6NZI2|CAVN1_HUMAN	1.54547	0.0104489
sp|Q6P2Q9|PRP8_HUMAN	1.52063	0.00180945
sp|Q6PKG0|LARP1_HUMAN	1.55687	0.00275682
sp|Q71UM5|RS27L_HUMAN	1.57295	0.0316735
sp|Q7KZF4|SND1_HUMAN	1.57629	0.0146048
sp|Q7L014|DDX46_HUMAN	2.08586	0.00164871
sp|Q7L0Y3|TM10C_HUMAN	4.60969	0.018229
sp|Q7L2E3|DHX30_HUMAN	4.34417	0.0116221
sp|Q7L576|CYFP1_HUMAN;sp|Q96F07|CYFP2_HUMAN	1.57146	0.000322105
sp|Q7Z2W4|ZCCHV_HUMAN	4.24178	0.014779
sp|Q7Z6Z7|HUWE1_HUMAN	1.25848	0.00088083
sp|Q86TC9|MYPN_HUMAN	1.2705	0.0248046
sp|Q86UP2|KTN1_HUMAN	3.61272	0.0287208
sp|Q86V81|THOC4_HUMAN	2.24707	0.00520823
sp|Q86VP6|CAND1_HUMAN	1.45608	0.000440737
sp|Q86W42|THOC6_HUMAN	1.24726	0.0191271
sp|Q86Y56|DAAF5_HUMAN	1.39281	0.0219583
sp|Q8N884|CGAS_HUMAN	1.60369	0.00898241
sp|Q8NC51|PAIRB_HUMAN	1.75061	0.00493527
sp|Q8NE71|ABCF1_HUMAN	1.45065	0.0150696
sp|Q8NF37|PCAT1_HUMAN	1.85033	0.00475883
sp|Q8TCJ2|STT3B_HUMAN	1.92086	0.0224912
sp|Q8TCS8|PNPT1_HUMAN	4.47116	0.023897
sp|Q8TDN6|BRX1_HUMAN	1.60205	0.0350721
sp|Q8TEM1|PO210_HUMAN	3.48397	0.0117781
sp|Q8TEQ6|GEMI5_HUMAN	12.2975	0.00120968
sp|Q8WUM4|PDC6I_HUMAN	2.05288	0.0018678
sp|Q92499|DDX1_HUMAN	1.75824	0.000388582
sp|Q92616|GCN1_HUMAN	1.70799	3.282e-06
sp|Q92769|HDAC2_HUMAN	2.98212	0.0469059
sp|Q92841|DDX17_HUMAN	2.04379	0.00110647
sp|Q92878|RAD50_HUMAN	5.20516	0.0312154
sp|Q92900|RENT1_HUMAN	1.25436	0.0158273
sp|Q92922|SMRC1_HUMAN	1.51842	0.0297976
sp|Q92973|TNPO1_HUMAN	1.33815	0.0210446
sp|Q92979|NEP1_HUMAN	1.22811	0.0137335
sp|Q969Z0|FAKD4_HUMAN	1.62843	0.00225724
sp|Q96A33|CCD47_HUMAN	2.14528	0.0184539
sp|Q96AG4|LRC59_HUMAN	1.50558	0.0125628
sp|Q96D46|NMD3_HUMAN	5.06464	0.0498162
sp|Q96EY1|DNJA3_HUMAN	1.70132	0.00588428
sp|Q96GQ7|DDX27_HUMAN	1.71841	0.00118253
sp|Q96HC4|PDLI5_HUMAN	1.35643	0.0315714
sp|Q96HS1|PGAM5_HUMAN	3.32884	0.0264597
sp|Q96KA5|CLP1L_HUMAN	1.36337	0.0484755
sp|Q96N66|MBOA7_HUMAN	1.53393	0.00979549
sp|Q96P70|IPO9_HUMAN	1.75537	0.00161382
sp|Q96PK6|RBM14_HUMAN	1.39917	0.0143851
sp|Q96T76|MMS19_HUMAN	3.03658	0.0455756
sp|Q99613|EIF3C_HUMAN;sp|B5ME19|EIFCL_HUMAN	1.92682	0.00683598
sp|Q99623|PHB2_HUMAN	1.71467	0.00577134
sp|Q99729|ROAA_HUMAN	1.38727	0.00971956
sp|Q99832|TCPH_HUMAN	1.52347	0.00115435
sp|Q99848|EBP2_HUMAN	1.57672	0.0247439
sp|Q99878|H2A1J_HUMAN;sp|Q96KK5|H2A1H_HUMAN;sp|Q9BTM1|H2AJ_HUMAN;sp|Q16777|H2A2C_HUMAN;sp|Q6FI13|H2A2A_HUMAN;sp|P20671|H2A1D_HUMAN;sp|P0C0S8|H2A1_HUMAN	1.36753	0.0052849
sp|Q9BQE3|TBA1C_HUMAN	1.72167	0.0272233
sp|Q9BQG0|MBB1A_HUMAN	1.48633	0.0142609
sp|Q9BT73|PSMG3_HUMAN	1.55658	0.000410767
sp|Q9BUF5|TBB6_HUMAN	1.71184	0.00367755
sp|Q9BUQ8|DDX23_HUMAN	5.4464	0.027949
sp|Q9BVA1|TBB2B_HUMAN;sp|Q13885|TBB2A_HUMAN	1.69901	0.00201475
sp|Q9BVP2|GNL3_HUMAN	1.86939	0.00119902
sp|Q9BXP5|SRRT_HUMAN	2.04297	5.58499e-05
sp|Q9BXS5|AP1M1_HUMAN	4.88496	0.0487324
sp|Q9BY44|EIF2A_HUMAN	1.33234	0.0440613
sp|Q9BY77|PDIP3_HUMAN	1.53619	0.00155891
sp|Q9BZK7|TBL1R_HUMAN	1.34082	0.0452583
sp|Q9H0A0|NAT10_HUMAN	1.98826	0.0285957
sp|Q9H0S4|DDX47_HUMAN	1.50776	0.0271641
sp|Q9H0U4|RAB1B_HUMAN	1.71258	0.00528074
sp|Q9H4A6|GOLP3_HUMAN	1.38454	0.00633368
sp|Q9H8H3|MET7A_HUMAN	1.60404	0.0109807
sp|Q9H9B4|SFXN1_HUMAN	2.15672	0.000224238
sp|Q9HAV4|XPO5_HUMAN	1.48258	0.00369878
sp|Q9HB71|CYBP_HUMAN	1.26598	0.00368964
sp|Q9NR30|DDX21_HUMAN	1.55825	0.00233096
sp|Q9NR31|SAR1A_HUMAN	1.69145	4.8323e-05
sp|Q9NRG9|AAAS_HUMAN	1.44207	0.034043
sp|Q9NSE4|SYIM_HUMAN	1.37965	9.71646e-05
sp|Q9NTJ3|SMC4_HUMAN	5.54639	0.0131834
sp|Q9NUQ8|ABCF3_HUMAN	3.12525	0.0449185
sp|Q9NUU7|DD19A_HUMAN	1.86394	0.00173492
sp|Q9NZ01|TECR_HUMAN	1.48852	0.000308691
sp|Q9NZM1|MYOF_HUMAN	1.9281	0.00367428
sp|Q9NZN4|EHD2_HUMAN	2.28363	0.0156545
sp|Q9P258|RCC2_HUMAN	1.55515	0.0144435
sp|Q9P287|BCCIP_HUMAN	1.48348	0.0229263
sp|Q9P289|STK26_HUMAN	2.32265	0.00777786
sp|Q9P2E9|RRBP1_HUMAN	7.77797	0.0165367
sp|Q9P2J5|SYLC_HUMAN	1.60761	0.00121384
sp|Q9UBB4|ATX10_HUMAN	1.99973	0.0119759
sp|Q9UBX3|DIC_HUMAN	1.66074	0.00136529
sp|Q9UG63|ABCF2_HUMAN	1.77701	0.00998297
sp|Q9UHB9|SRP68_HUMAN	9.32367	0.00752691
sp|Q9UHD1|CHRD1_HUMAN	3.35108	0.0477122
sp|Q9UHD8|SEPT9_HUMAN	1.84413	0.00341901
sp|Q9UIA9|XPO7_HUMAN	5.61793	0.0315466
sp|Q9UKD2|MRT4_HUMAN	1.54897	0.00371627
sp|Q9UMS4|PRP19_HUMAN	1.73473	0.000242769
sp|Q9UN86|G3BP2_HUMAN	1.48166	0.0335773
sp|Q9UNM6|PSD13_HUMAN	1.72821	0.0345768
sp|Q9UQ35|SRRM2_HUMAN	1.59252	0.00227345
sp|Q9UQ80|PA2G4_HUMAN	1.31534	0.00148623
sp|Q9UQE7|SMC3_HUMAN	10.0753	0.00269987
sp|Q9Y224|RTRAF_HUMAN	1.8444	0.00119545
sp|Q9Y230|RUVB2_HUMAN	1.83259	0.0181479
sp|Q9Y265|RUVB1_HUMAN	1.42595	0.00443908
sp|Q9Y285|SYFA_HUMAN	2.52233	0.0099892
sp|Q9Y295|DRG1_HUMAN	1.75119	0.000490495
sp|Q9Y2W1|TR150_HUMAN	1.6571	0.00636051
sp|Q9Y2W2|WBP11_HUMAN	1.54736	0.020235
sp|Q9Y2Z4|SYYM_HUMAN	2.00093	0.0173694
sp|Q9Y383|LC7L2_HUMAN	1.24479	0.00710583
sp|Q9Y3I0|RTCB_HUMAN	1.5157	0.00374096
sp|Q9Y3T9|NOC2L_HUMAN	1.6766	0.0241025
sp|Q9Y3U8|RL36_HUMAN	1.71223	0.01095
sp|Q9Y490|TLN1_HUMAN	1.61654	0.000778617
sp|Q9Y4L1|HYOU1_HUMAN	1.67168	0.00183435
sp|Q9Y5B9|SP16H_HUMAN	1.58159	0.0400256
sp|Q9Y5M8|SRPRB_HUMAN	1.68314	0.0108137
sp|Q9Y678|COPG1_HUMAN	1.88672	0.00211123
