# Supplementary material for: Hsp90α forms condensate engaging client proteins with RG motif repeats
Source: Royal Society of Chemistry journal article supplement (doi:10.1039/d4sc00267a), 2024-01-01
Supplement: d4sc00267a2.xlsx [file d4sc00267a2.xlsx]

## Sheet: GO_Over.Representation.Test1683
GOIDs	Ontology	Description	Counts	Annotated	pvalue	IDs
GO:0000018	BP	regulation of DNA recombination	2	6	0.000427882	P52292/Q86V81
GO:0000019	BP	regulation of mitotic recombination	1	2	0.0107401	Q92878
GO:0000027	BP	ribosomal large subunit assembly	10	27	1.45896e-16	P27635/P30050/P39023/P46777/P62750/P62913/P83731/Q02878/Q8TDN6/Q9UKD2
GO:0000028	BP	ribosomal small subunit assembly	3	21	0.000192037	P46783/P62263/Q71UM5
GO:0000049	MF	tRNA binding	15	79	2.97372e-19	O43592/P18077/P41252/P54136/P54577/P56192/P68104/Q08J23/Q12904/Q15046/Q9BY44/Q9HAV4/Q9NSE4/Q9Y285/Q9Y2Z4
GO:0000050	BP	urea cycle	3	15	6.72959e-05	P00966/P27708/P31327
GO:0000053	BP	argininosuccinate metabolic process	1	2	0.0107401	P00966
GO:0000054	BP	ribosomal subunit export from nucleus	1	2	0.0107401	P61221
GO:0000055	BP	ribosomal large subunit export from nucleus	3	11	2.47989e-05	O14980/P62826/Q96D46
GO:0000056	BP	ribosomal small subunit export from nucleus	2	5	0.000286277	O14980/P62826
GO:0000060	BP	protein import into nucleus, translocation	3	30	0.000565493	P62826/Q92973/Q99623
GO:0000070	BP	mitotic sister chromatid segregation	3	24	0.000288755	O43684/Q14683/Q9NTJ3
GO:0000082	BP	G1/S transition of mitotic cell cycle	11	123	8.88559e-11	P06493/P24941/P25205/P33991/P33992/P33993/P49643/P49736/P62753/Q13619/Q14566
GO:0000086	BP	G2/M transition of mitotic cell cycle	10	137	4.67647e-09	P06493/P07437/P24941/P50570/P61163/P62140/P68371/Q07666/Q14203/Q14204
GO:0000105	BP	histidine biosynthetic process	1	2	0.0107401	P11586
GO:0000122	BP	negative regulation of transcription by RNA polymerase II	23	800	1.42009e-10	O14980/O75530/O94776/P09874/P10412/P12270/P16401/P16403/P17844/P22626/P23246/P35232/P40763/P51532/P51610/P62263/P67809/Q07021/Q14839/Q92769/Q96EY1/Q9BZK7/Q9Y3T9
GO:0000139	CC	Golgi membrane	18	867	1.64515e-06	O14579/O15260/P00533/P35606/P46459/P48444/P50570/P53618/P53621/P55735/P62820/P84077/Q14980/Q8NF37/Q9BXS5/Q9H0U4/Q9P289/Q9Y678
GO:0000146	MF	microfilament motor activity	2	22	0.00622415	O00159/P35579
GO:0000160	BP	phosphorelay signal transduction system	1	2	0.0107401	Q96T76
GO:0000165	BP	MAPK cascade	18	275	2.16133e-14	O00232/O00487/O43242/P00533/P17980/P25789/P28070/P35998/P43686/P62191/P62195/P62333/Q01082/Q13200/Q13813/Q15008/Q16401/Q9UNM6
GO:0000166	MF	nucleotide binding	43	1512	1.71453e-18	O00425/O15042/O43390/P07910/P08621/P09012/P09651/P12268/P14866/P19338/P22626/P23246/P23588/P26368/P31943/P38159/P43243/P51991/P52272/P55795/P62750/P62847/P84103/Q01081/Q01130/Q01844/Q07955/Q13148/Q13151/Q13247/Q13310/Q14498/Q15233/Q15287/Q15424/Q15717/Q16630/Q86V81/Q96PK6/Q99729/Q9BXP5/Q9BY77/Q9UN86
GO:0000184	BP	nuclear-transcribed mRNA catabolic process, nonsense-mediated decay	60	130	9.75964e-101	P05387/P05388/P15880/P18077/P18124/P18621/P23396/P26373/P27635/P30050/P32969/P35268/P36578/P38919/P39023/P40429/P42766/P46776/P46777/P46778/P46779/P46781/P46783/P49207/P50914/P60866/P61247/P61254/P61313/P61353/P61513/P62081/P62241/P62249/P62263/P62266/P62277/P62280/P62424/P62495/P62701/P62750/P62753/P62829/P62847/P62861/P62888/P62899/P62906/P62910/P62913/P62917/P63173/P83731/P84098/Q02878/Q04637/…
GO:0000209	BP	protein polyubiquitination	17	210	3.45675e-15	O00232/O00487/O43242/P17980/P25789/P28070/P35998/P43686/P62191/P62195/P62333/Q13200/Q15008/Q16401/Q7Z6Z7/Q9UMS4/Q9UNM6
GO:0000228	CC	nuclear chromosome	2	40	0.0197204	P52701/P62805
GO:0000243	CC	commitment complex	4	9	1.02472e-07	P08621/P26368/P62314/P62318
GO:0000244	BP	spliceosomal tri-snRNP complex assembly	3	18	0.000119246	O94906/Q6P2Q9/Q9UMS4
GO:0000245	BP	spliceosomal complex assembly	8	32	6.28444e-12	O75533/O94906/P62314/P62318/Q13838/Q53GS9/Q92499/Q9UMS4
GO:0000266	BP	mitochondrial fission	2	35	0.0153107	O00429/P50570
GO:0000275	CC	mitochondrial proton-transporting ATP synthase complex, catalytic core F(1)	1	4	0.021365	P36542
GO:0000289	BP	nuclear-transcribed mRNA poly(A) tail shortening	4	30	2.0375e-05	P23588/P38919/P60842/Q04637
GO:0000294	BP	nuclear-transcribed mRNA catabolic process, endonucleolytic cleavage-dependent decay	1	2	0.0107401	Q92900
GO:0000339	MF	RNA cap binding	2	18	0.00418152	P60842/Q6PKG0
GO:0000346	CC	transcription export complex	3	10	1.81081e-05	Q13838/Q86V81/Q86W42
GO:0000354	BP	cis assembly of pre-catalytic spliceosome	2	2	2.89369e-05	O75643/Q9BUQ8
GO:0000375	BP	RNA splicing, via transesterification reactions	6	26	4.97402e-09	O75533/O94906/Q12874/Q15393/Q6P2Q9/Q9BUQ8
GO:0000380	BP	alternative mRNA splicing, via spliceosome	4	16	1.43648e-06	P23246/P52272/Q07955/Q13247
GO:0000381	BP	regulation of alternative mRNA splicing, via spliceosome	8	84	2.03874e-08	P14866/P17844/P38159/Q01130/Q13247/Q15287/Q15459/Q9Y2W1
GO:0000386	MF	second spliceosomal transesterification activity	1	2	0.0107401	Q6P2Q9
GO:0000387	BP	spliceosomal snRNP assembly	5	41	2.83486e-06	P14678/P62306/P62314/P62318/Q8TEQ6
GO:0000389	BP	mRNA 3'-splice site recognition	2	6	0.000427882	Q12874/Q15459
GO:0000395	BP	mRNA 5'-splice site recognition	2	8	0.000793022	O75475/Q07955
GO:0000398	BP	mRNA splicing, via spliceosome	57	325	1.0794e-67	O43390/O43809/O75533/O75643/O94906/P07910/P08621/P09012/P09651/P09661/P11142/P14678/P14866/P17844/P22626/P26368/P31943/P38159/P38919/P42285/P51991/P52272/P55769/P55795/P61978/P62306/P62314/P62318/P67809/P84103/Q00839/Q01081/Q01130/Q07955/Q08211/Q12874/Q13151/Q13247/Q13435/Q13838/Q15029/Q15233/Q15287/Q15365/Q15366/Q15393/Q15459/Q15717/Q53GS9/Q6P2Q9/Q7L014/Q86V81/Q8TEQ6/Q9BUQ8/Q9BXP5/Q9UMS4/Q9UQ35
GO:0000403	MF	Y-form DNA binding	1	4	0.021365	P43246
GO:0000404	MF	heteroduplex DNA loop binding	1	2	0.0107401	P43246
GO:0000406	MF	double-strand/single-strand DNA junction binding	1	1	0.00538451	P43246
GO:0000462	BP	maturation of SSU-rRNA from tricistronic rRNA transcript (SSU-rRNA, 5.8S rRNA, LSU-rRNA)	6	34	2.80146e-08	P62241/P62249/P62263/P62847/Q2NL82/Q92979
GO:0000463	BP	maturation of LSU-rRNA from tricistronic rRNA transcript (SSU-rRNA, 5.8S rRNA, LSU-rRNA)	3	16	8.24943e-05	O00541/P18124/P42766
GO:0000470	BP	maturation of LSU-rRNA	5	15	1.27505e-08	O76021/P46087/P55769/P62424/P62906
GO:0000479	BP	endonucleolytic cleavage of tricistronic rRNA transcript (SSU-rRNA, 5.8S rRNA, LSU-rRNA)	1	2	0.0107401	Q2NL82
GO:0000492	BP	box C/D snoRNP assembly	2	7	0.000596896	Q9Y230/Q9Y265
GO:0000495	BP	box H/ACA snoRNA 3'-end processing	1	1	0.00538451	O60832
GO:0000502	CC	proteasome complex	17	94	2.96826e-21	O00232/O00487/O43242/P04792/P17980/P25789/P28070/P35998/P43686/P62191/P62195/P62333/Q13200/Q15008/Q16401/Q5VYK3/Q9UNM6
GO:0000710	BP	meiotic mismatch repair	2	4	0.000172382	P43246/P52701
GO:0000715	BP	nucleotide-excision repair, DNA damage recognition	2	23	0.00679276	P09874/Q13619
GO:0000717	BP	nucleotide-excision repair, DNA duplex unwinding	2	22	0.00622415	P09874/Q13619
GO:0000722	BP	telomere maintenance via recombination	3	32	0.000685352	P39748/P49643/Q92878
GO:0000723	BP	telomere maintenance	4	85	0.00119202	P12956/P13010/Q92878/Q92900
GO:0000724	BP	double-strand break repair via homologous recombination	6	139	0.000116136	O00487/P09874/P23246/P39748/P46063/Q92878
GO:0000733	BP	DNA strand renaturation	1	4	0.021365	P46063
GO:0000775	CC	chromosome, centromeric region	4	81	0.000996157	P46013/Q14683/Q29RF7/Q9UQE7
GO:0000776	CC	kinetochore	5	99	0.000209399	O14980/O43684/P12270/Q14203/Q14683
GO:0000777	CC	condensed chromosome kinetochore	5	86	0.000107971	O43684/P57740/Q14683/Q15019/Q16181
GO:0000783	CC	nuclear telomere cap complex	2	9	0.00101596	P12956/P13010
GO:0000784	CC	nuclear chromosome, telomeric region	17	106	2.59393e-20	P06493/P09874/P12956/P13010/P25205/P33991/P33992/P33993/P39748/P43246/P49736/P62805/P78527/Q14566/Q92878/Q92900/Q9H0A0
GO:0000785	CC	chromatin	7	121	4.68648e-06	P23246/P33993/P42166/P49736/Q29RF7/Q92900/Q9UQE7
GO:0000786	CC	nucleosome	6	125	6.46275e-05	P10412/P16401/P16403/P62805/Q5SSJ5/Q99878
GO:0000790	CC	nuclear chromatin	12	206	1.79024e-09	O94776/P07910/P16401/P40763/P51532/P52701/P61978/Q14839/Q92769/Q92878/Q92922/Q99878
GO:0000793	CC	condensed chromosome	4	27	1.32161e-05	O00541/P24941/P46013/Q15021
GO:0000794	CC	condensed nuclear chromosome	3	29	0.000510981	P42704/Q14683/Q92878
GO:0000796	CC	condensin complex	2	30	0.0113931	Q15021/Q9NTJ3
GO:0000797	CC	condensin core heterodimer	1	1	0.00538451	Q15021
GO:0000799	CC	nuclear condensin complex	1	3	0.0160669	Q15021
GO:0000805	CC	X chromosome	1	3	0.0160669	P24941
GO:0000806	CC	Y chromosome	1	3	0.0160669	P24941
GO:0000812	CC	Swr1 complex	2	9	0.00101596	Q9Y230/Q9Y265
GO:0000932	CC	P-body	6	85	7.22329e-06	P11387/P17980/P25789/P26196/P35998/Q92900
GO:0000956	BP	nuclear-transcribed mRNA catabolic process	3	13	4.26411e-05	Q92900/Q9UKD2/Q9Y2W1
GO:0000957	BP	mitochondrial RNA catabolic process	1	1	0.00538451	Q8TCS8
GO:0000958	BP	mitochondrial mRNA catabolic process	1	2	0.0107401	Q8TCS8
GO:0000961	BP	negative regulation of mitochondrial RNA catabolic process	1	3	0.0160669	P42704
GO:0000962	BP	positive regulation of mitochondrial RNA catabolic process	1	2	0.0107401	Q8TCS8
GO:0000964	BP	mitochondrial RNA 5'-end processing	2	2	2.89369e-05	Q7L0Y3/Q8TCS8
GO:0000965	BP	mitochondrial RNA 3'-end processing	1	2	0.0107401	Q8TCS8
GO:0000972	BP	transcription-dependent tethering of RNA polymerase II gene DNA at nuclear periphery	1	4	0.021365	O75694
GO:0000973	BP	posttranscriptional tethering of RNA polymerase II gene DNA at nuclear periphery	2	2	2.89369e-05	P52948/P57740
GO:0000974	CC	Prp19 complex	2	11	0.00154112	P11142/Q9UMS4
GO:0000980	MF	RNA polymerase II distal enhancer sequence-specific DNA binding	4	53	0.000197408	P07910/P23246/Q15233/Q9Y230
GO:0001047	MF	core promoter binding	7	67	8.28882e-08	P23246/P38159/Q00839/Q15233/Q15424/Q92769/Q9BQG0
GO:0001085	MF	RNA polymerase II transcription factor binding	2	44	0.023583	O94776/Q08211
GO:0001103	MF	RNA polymerase II repressing transcription factor binding	4	23	6.78311e-06	O94776/P40763/Q14839/Q92769
GO:0001164	MF	RNA polymerase I CORE element sequence-specific DNA binding	2	10	0.00126543	P17480/P51532
GO:0001165	MF	RNA polymerase I upstream control element sequence-specific DNA binding	1	1	0.00538451	P17480
GO:0001205	MF	distal enhancer DNA-binding transcription activator activity, RNA polymerase II-specific	3	27	0.000412319	P51610/P53999/Q13148
GO:0001525	BP	angiogenesis	5	299	0.0236679	P06576/P07355/P19338/P35579/Q12904
GO:0001649	BP	osteoblast differentiation	19	114	7.05981e-23	O75643/O76021/P06576/P07910/P35232/P35998/P38159/P41252/P55265/P62280/Q00610/Q00839/Q08211/Q7KZF4/Q86V81/Q96A33/Q9BQG0/Q9NR30/Q9P2E9
GO:0001651	CC	dense fibrillar component	1	2	0.0107401	P55769
GO:0001664	MF	G protein-coupled receptor binding	4	48	0.000133993	P0DMV9/P11142/P21333/P31689
GO:0001671	MF	ATPase activator activity	2	22	0.00622415	O95433/P25685
GO:0001701	BP	in utero embryonic development	8	225	3.46933e-05	P20042/P35579/P43246/P55265/P67809/Q07955/Q13619/Q9Y3I0
GO:0001725	CC	stress fiber	5	53	1.02934e-05	O75369/P35579/Q13418/Q16181/Q9UHD8
GO:0001726	CC	ruffle	4	95	0.00179678	P07355/P35579/Q7L576/Q9Y490
GO:0001731	BP	formation of translation preinitiation complex	7	66	7.45734e-08	O00303/O15371/P23588/P41091/Q13347/Q14152/Q99613
GO:0001732	BP	formation of cytoplasmic translation initiation complex	2	3	8.65001e-05	O15371/Q14152
GO:0001772	CC	immunological synapse	2	36	0.0161542	P35579/Q8WUM4
GO:0001824	BP	blastocyst development	2	22	0.00622415	P17980/P43686
GO:0001843	BP	neural tube closure	3	92	0.0136827	O15031/P11586/P62081
GO:0001850	MF	complement component C3a binding	1	1	0.00538451	P35232
GO:0001851	MF	complement component C3b binding	1	2	0.0107401	P35232
GO:0001889	BP	liver development	3	93	0.0140833	P00966/P27708/Q13838
GO:0001890	BP	placenta development	2	43	0.0225904	P62753/Q9Y3I0
GO:0001891	CC	phagocytic cup	2	23	0.00679276	P50570/P63244
GO:0001937	BP	negative regulation of endothelial cell proliferation	2	33	0.0136829	P25705/Q12904
GO:0001975	BP	response to amphetamine	2	44	0.023583	P49792/Q92769
GO:0002036	BP	regulation of L-glutamate import across plasma membrane	1	1	0.00538451	Q15019
GO:0002161	MF	aminoacyl-tRNA editing activity	4	40	6.51122e-05	P26640/P41252/Q9NSE4/Q9P2J5
GO:0002176	BP	male germ cell proliferation	1	4	0.021365	P20042
GO:0002181	BP	cytoplasmic translation	13	26	2.68093e-23	P05387/P05388/P18077/P18124/P23588/P32969/P35268/P61254/P61313/P62899/P62917/Q02878/Q9Y3U8
GO:0002188	BP	translation reinitiation	1	1	0.00538451	Q14152
GO:0002189	CC	ribose phosphate diphosphokinase complex	1	3	0.0160669	P60891
GO:0002199	CC	zona pellucida receptor complex	5	10	1.09404e-09	P17987/P48643/P49368/P50991/Q99832
GO:0002223	BP	stimulatory C-type lectin receptor signaling pathway	16	104	6.79593e-19	O00232/O00487/O43242/P17980/P25789/P28070/P35998/P43686/P62191/P62195/P62333/Q13177/Q13200/Q15008/Q16401/Q9UNM6
GO:0002360	BP	T cell lineage commitment	1	4	0.021365	P78527
GO:0002479	BP	antigen processing and presentation of exogenous peptide antigen via MHC class I, TAP-dependent	15	130	7.25941e-16	O00232/O00487/O43242/P17980/P25789/P28070/P35998/P43686/P62191/P62195/P62333/Q13200/Q15008/Q16401/Q9UNM6
GO:0002566	BP	somatic diversification of immune receptors via somatic mutation	1	1	0.00538451	P55265
GO:0002638	BP	negative regulation of immunoglobulin production	1	2	0.0107401	P78527
GO:0002684	BP	positive regulation of immune system process	1	2	0.0107401	P78527
GO:0002931	BP	response to ischemia	3	42	0.00152425	O95831/P13639/Q9Y4L1
GO:0002934	BP	desmosome organization	1	4	0.021365	P15924
GO:0003281	BP	ventricular septum development	2	31	0.0121358	P50570/P63010
GO:0003374	BP	dynamin family protein polymerization involved in mitochondrial fission	2	7	0.000596896	O00429/P50570
GO:0003433	BP	chondrocyte development involved in endochondral bone morphogenesis	1	2	0.0107401	P50454
GO:0003677	MF	DNA binding	47	3710	7.92428e-08	O00571/O75534/O95232/O95831/P06748/P09874/P11387/P11498/P12268/P12956/P13010/P18124/P18583/P23396/P25205/P29692/P35659/P39748/P40763/P42166/P42167/P43246/P46013/P46063/P49643/P49736/P55265/P62805/P67809/P78347/Q00839/Q02878/Q07666/Q08211/Q08945/Q12905/Q12906/Q14839/Q5SSJ5/Q7Z6Z7/Q8N884/Q92499/Q92878/Q92922/Q99878/Q9BXP5/Q9UQ80
GO:0003678	MF	DNA helicase activity	9	59	3.51184e-11	P25205/P33991/P33992/P33993/P46063/P49736/Q14566/Q9Y230/Q9Y265
GO:0003682	MF	chromatin binding	28	501	8.17624e-20	O75475/O75530/O94776/P00533/P06493/P11387/P12270/P23246/P33992/P34897/P35659/P38159/P51610/P52701/P62826/P67809/Q08945/Q14683/Q15021/Q15233/Q15424/Q7L2E3/Q92499/Q92769/Q92900/Q92922/Q9UQE7/Q9Y3T9
GO:0003684	MF	damaged DNA binding	6	169	0.000334174	P12956/P13010/P23396/P39748/P43246/P52701
GO:0003688	MF	DNA replication origin binding	2	21	0.00567845	P33992/P49736
GO:0003690	MF	double-stranded DNA binding	8	95	5.39775e-08	P00533/P12956/P13010/P39748/P67809/P78527/Q13148/Q15424
GO:0003697	MF	single-stranded DNA binding	11	127	1.25796e-10	P09651/P33991/P33993/P36776/P42704/P53999/P61978/P67809/Q14566/Q15365/Q9Y2W2
GO:0003712	MF	transcription coregulator activity	5	127	0.000658159	P62195/Q15645/Q7KZF4/Q92499/Q9Y2W1
GO:0003713	MF	transcription coactivator activity	12	331	3.28034e-07	O94906/P06748/P17844/P17980/P51532/P51610/P53999/P62826/Q92841/Q92922/Q96T76/Q9Y2W1
GO:0003714	MF	transcription corepressor activity	7	289	0.00106547	P17980/P51532/Q01130/Q07021/Q9BQG0/Q9BZK7/Q9Y3T9
GO:0003720	MF	telomerase activity	1	4	0.021365	O60832
GO:0003723	MF	RNA binding	92	1289	6.70153e-73	O00425/O00541/O00571/O14980/O43390/O60832/O76021/O94906/P06748/P07910/P08621/P09012/P09651/P12268/P14866/P18124/P18583/P19338/P20042/P22626/P23396/P23588/P26373/P26639/P31943/P32969/P35268/P36578/P37108/P38159/P39023/P42704/P46776/P46777/P46778/P46779/P47897/P49207/P49792/P50914/P51991/P52272/P52948/P55795/P61247/P61254/P61313/P61978/P62081/P62249/P62263/P62306/P62314/P62424/P62495/P62861/P62888/…
GO:0003724	MF	RNA helicase activity	6	37	4.77677e-08	P17844/P26196/P42285/Q08211/Q92499/Q92841
GO:0003725	MF	double-stranded RNA binding	12	132	1.01707e-11	P08670/P19525/P60842/P68363/P68371/Q00610/Q12905/Q12906/Q15717/Q7L2E3/Q92499/Q9NR30
GO:0003729	MF	mRNA binding	25	183	2.03246e-27	O43809/O75533/O95232/P08621/P12270/P15880/P18124/P23396/P38159/P38919/P40429/P42766/P51991/P60842/P62277/Q07021/Q07955/Q14152/Q15365/Q15717/Q16630/Q99729/Q9HAV4/Q9UN86/Q9Y383
GO:0003730	MF	mRNA 3'-UTR binding	9	58	2.99034e-11	O00425/O43390/P07910/P22626/Q13148/Q15287/Q15717/Q6PKG0/Q8NC51
GO:0003735	MF	structural constituent of ribosome	61	764	4.54515e-51	P05141/P05387/P05388/P12236/P15880/P18077/P18124/P18621/P23396/P26373/P27635/P30050/P32969/P35268/P36578/P39023/P40429/P42766/P46776/P46777/P46778/P46779/P46781/P46783/P49207/P50914/P51398/P60866/P61247/P61254/P61313/P61353/P61513/P62081/P62241/P62249/P62263/P62266/P62277/P62280/P62424/P62701/P62750/P62753/P62829/P62847/P62861/P62888/P62899/P62906/P62910/P62913/P62917/P63173/P83731/P84098/Q00325/…
GO:0003743	MF	translation initiation factor activity	14	266	3.02098e-10	O00303/O15371/O60841/P05198/P20042/P23588/P41091/P60842/P78344/Q04637/Q13347/Q14152/Q99613/Q9BY44
GO:0003746	MF	translation elongation factor activity	5	129	0.00070631	P13639/P24534/P26641/P29692/P68104
GO:0003779	MF	actin binding	6	134	9.49555e-05	O75369/P35579/Q01082/Q13045/Q13813/Q96HC4
GO:0003841	MF	1-acylglycerol-3-phosphate O-acyltransferase activity	2	31	0.0121358	Q8NF37/Q96N66
GO:0003872	MF	6-phosphofructokinase activity	3	43	0.00163206	P08237/P17858/Q01813
GO:0003924	MF	GTPase activity	22	662	2.34067e-11	O00429/O00571/O60841/P07437/P13639/P18085/P41091/P50570/P62820/P62826/P68104/P68363/P68371/P84077/Q15029/Q2NL82/Q6DD88/Q9BQE3/Q9BUF5/Q9BVA1/Q9BVP2/Q9UHD8
GO:0003972	MF	RNA ligase (ATP) activity	1	1	0.00538451	Q9Y3I0
GO:0004003	MF	ATP-dependent DNA helicase activity	7	73	1.51034e-07	O00571/P12956/P13010/P46063/Q08211/Q14839/Q9Y230
GO:0004004	MF	ATP-dependent RNA helicase activity	18	100	2.19513e-22	O00571/O75643/P17844/P26196/P38919/P60842/Q08211/Q13838/Q7L014/Q7L2E3/Q92499/Q92841/Q92900/Q96GQ7/Q9BUQ8/Q9H0S4/Q9NR30/Q9NUU7
GO:0004070	MF	aspartate carbamoyltransferase activity	2	5	0.000286277	P27708/P31327
GO:0004087	MF	carbamoyl-phosphate synthase (ammonia) activity	2	2	2.89369e-05	P27708/P31327
GO:0004088	MF	carbamoyl-phosphate synthase (glutamine-hydrolyzing) activity	2	12	0.00184276	P27708/P31327
GO:0004133	MF	glycogen debranching enzyme activity	1	1	0.00538451	P35573
GO:0004134	MF	4-alpha-glucanotransferase activity	1	4	0.021365	P35573
GO:0004135	MF	amylo-alpha-1,6-glucosidase activity	1	4	0.021365	P35573
GO:0004151	MF	dihydroorotase activity	2	2	2.89369e-05	P27708/P31327
GO:0004349	MF	glutamate 5-kinase activity	1	1	0.00538451	P54886
GO:0004350	MF	glutamate-5-semialdehyde dehydrogenase activity	1	1	0.00538451	P54886
GO:0004386	MF	helicase activity	5	210	0.00584831	P23588/P26196/P51532/P60842/Q92900
GO:0004407	MF	histone deacetylase activity	3	67	0.00575987	O94776/Q14839/Q92769
GO:0004477	MF	methenyltetrahydrofolate cyclohydrolase activity	1	3	0.0160669	P11586
GO:0004486	MF	methylenetetrahydrofolate dehydrogenase [NAD(P)+] activity	1	1	0.00538451	P11586
GO:0004487	MF	methylenetetrahydrofolate dehydrogenase (NAD+) activity	1	3	0.0160669	P11586
GO:0004527	MF	exonuclease activity	2	41	0.0206588	P39748/Q92499
GO:0004579	MF	dolichyl-diphosphooligosaccharide-protein glycotransferase activity	3	15	6.72959e-05	P04843/P46977/Q8TCJ2
GO:0004617	MF	phosphoglycerate dehydrogenase activity	1	3	0.0160669	O43175
GO:0004638	MF	phosphoribosylaminoimidazole carboxylase activity	1	1	0.00538451	P22234
GO:0004641	MF	phosphoribosylformylglycinamidine cyclo-ligase activity	1	4	0.021365	P22102
GO:0004654	MF	polyribonucleotide nucleotidyltransferase activity	1	3	0.0160669	Q8TCS8
GO:0004677	MF	DNA-dependent protein kinase activity	1	4	0.021365	P78527
GO:0004693	MF	cyclin-dependent protein serine/threonine kinase activity	2	37	0.0170172	P06493/P24941
GO:0004726	MF	non-membrane spanning protein tyrosine phosphatase activity	2	10	0.00126543	P24666/Q06124
GO:0004736	MF	pyruvate carboxylase activity	1	2	0.0107401	P11498
GO:0004738	MF	pyruvate dehydrogenase activity	1	2	0.0107401	P08559
GO:0004749	MF	ribose phosphate diphosphokinase activity	3	28	0.000459955	P11908/P60891/Q14558
GO:0004822	MF	isoleucine-tRNA ligase activity	2	10	0.00126543	P41252/Q9NSE4
GO:0004824	MF	lysine-tRNA ligase activity	1	2	0.0107401	Q15046
GO:0004827	MF	proline-tRNA ligase activity	1	3	0.0160669	P07814
GO:0004831	MF	tyrosine-tRNA ligase activity	2	5	0.000286277	P54577/Q9Y2Z4
GO:0004832	MF	valine-tRNA ligase activity	2	18	0.00418152	P26640/P54577
GO:0005047	MF	signal recognition particle binding	3	11	2.47989e-05	O76094/Q9UHB9/Q9Y5M8
GO:0005048	MF	signal sequence binding	1	2	0.0107401	P63010
GO:0005049	MF	nuclear export signal receptor activity	5	8	2.45295e-10	O14980/P35658/P55060/Q9HAV4/Q9UIA9
GO:0005080	MF	protein kinase C binding	4	34	3.38966e-05	P04792/P15924/P63244/Q96HC4
GO:0005102	MF	signaling receptor binding	6	305	0.00654553	O00159/O60610/O60716/P0DMV9/P41240/P63244
GO:0005133	MF	interferon-gamma receptor binding	1	2	0.0107401	Q96EY1
GO:0005153	MF	interleukin-8 receptor binding	1	2	0.0107401	P54577
GO:0005198	MF	structural molecule activity	21	603	2.82838e-11	O14579/P02545/P05783/P05787/P07437/P08729/P15924/P20700/P27816/P35606/P43243/P53618/P53621/P68363/Q00610/Q14152/Q14980/Q16181/Q9BQE3/Q9UNM6/Q9Y678
GO:0005200	MF	structural constituent of cytoskeleton	13	237	7.87592e-10	P07437/P08670/P15924/P59998/P61160/P68363/P68371/Q01082/Q13813/Q9BQE3/Q9BUF5/Q9BVA1/Q9Y490
GO:0005215	MF	transporter activity	8	552	0.0108525	O14980/O75694/O95373/P06576/P48047/P52948/Q13428/Q9UG63
GO:0005310	MF	dicarboxylic acid transmembrane transporter activity	1	1	0.00538451	Q9UBX3
GO:0005471	MF	ATP:ADP antiporter activity	1	1	0.00538451	P12236
GO:0005521	MF	lamin binding	2	11	0.00154112	P42166/P42167
GO:0005524	MF	ATP binding	131	6337	2.15205e-41	O00159/O00571/O43776/O60884/O75643/O76031/O95573/P00533/P00966/P06493/P06576/P07814/P08237/P0DMV9/P11021/P11142/P11498/P11586/P11908/P12081/P12956/P13010/P14618/P14868/P16615/P17844/P17858/P17980/P17987/P19525/P22102/P22234/P24941/P25205/P25705/P26196/P26639/P26640/P27708/P28288/P31327/P31689/P33176/P33991/P33992/P33993/P35579/P35998/P36776/P38646/P38919/P40227/P41240/P41252/P42285/P43246/P43686/…
GO:0005525	MF	GTP binding	30	1548	2.84788e-09	O00429/O60841/P07437/P13639/P18085/P41091/P50570/P62820/P62826/P68104/P68363/P68371/P84077/Q14978/Q15019/Q15029/Q16181/Q2NL82/Q6DD88/Q8N884/Q9BQE3/Q9BUF5/Q9BVA1/Q9BVP2/Q9H0U4/Q9NR31/Q9NZN4/Q9UHD8/Q9Y295/Q9Y5M8
GO:0005543	MF	phospholipid binding	3	105	0.0194104	P31327/Q01082/Q9NZM1
GO:0005634	CC	nucleus	258	10044	4.50743e-113	O00425/O00487/O00541/O00571/O14980/O15042/O43242/O43809/O60701/O60716/O60832/O75475/O75530/O75533/O75643/O94906/O95232/O95831/P00533/P00966/P02545/P04792/P04844/P05141/P05198/P05388/P05787/P06493/P06576/P06748/P07355/P07437/P07910/P08559/P08621/P08729/P09651/P09874/P10412/P10620/P11021/P11142/P11172/P11387/P12236/P12268/P12270/P12956/P13010/P13639/P14618/P14866/P15880/P15924/P16403/P17480/P17844/…
GO:0005635	CC	nuclear envelope	20	170	7.19539e-21	O14980/O75694/P02545/P09874/P12270/P20700/P42166/P42167/P49792/P52948/P55060/P55735/P57740/Q8NE71/Q8TEM1/Q96AG4/Q96P70/Q9NRG9/Q9NZM1/Q9Y3I0
GO:0005637	CC	nuclear inner membrane	5	49	6.96216e-06	P20700/P42166/P42167/P42704/P43243
GO:0005638	CC	lamin filament	2	10	0.00126543	P02545/P20700
GO:0005641	CC	nuclear envelope lumen	2	9	0.00101596	P07437/Q9HB71
GO:0005642	CC	annulate lamellae	1	4	0.021365	O14980
GO:0005643	CC	nuclear pore	13	124	2.19191e-13	O00159/O60684/O95373/P12270/P49792/P52292/P52948/P57740/P62826/Q8TEM1/Q9NRG9/Q9NUU7/Q9UIA9
GO:0005654	CC	nucleoplasm	228	4266	1.48213e-164	O00159/O00232/O00487/O00541/O14579/O14980/O15042/O43242/O43390/O43592/O43684/O43809/O60684/O60701/O60832/O75475/O75530/O75533/O75643/O76031/O94776/O94906/O95232/O95373/P02545/P05787/P06493/P06748/P07910/P08621/P09012/P09651/P09661/P09874/P0DMV9/P11142/P11387/P12270/P12956/P13010/P14678/P14866/P15880/P17480/P17844/P17980/P18583/P19338/P20700/P22626/P22695/P23246/P23396/P24539/P24941/P25205/P25685/…
GO:0005658	CC	alpha DNA polymerase:primase complex	1	3	0.0160669	P25205
GO:0005667	CC	transcription factor complex	7	332	0.00233539	O94776/P09874/P12956/P24941/P53999/P78527/Q96PK6
GO:0005681	CC	spliceosomal complex	26	140	4.03303e-32	O43390/O75533/O75643/O94906/P07910/P08621/P09012/P09651/P09661/P11142/P14678/P22626/P26368/P52272/P62306/P62318/Q01081/Q01130/Q12874/Q13435/Q13838/Q15029/Q15393/Q15459/Q53GS9/Q9Y2W2
GO:0005682	CC	U5 snRNP	7	17	2.33857e-12	O75643/O94906/P14678/P62314/P62318/Q6P2Q9/Q9BUQ8
GO:0005683	CC	U7 snRNP	3	7	5.34559e-06	P14678/P62306/P62318
GO:0005684	CC	U2-type spliceosomal complex	2	7	0.000596896	Q13435/Q15459
GO:0005685	CC	U1 snRNP	8	48	2.09072e-10	O95232/P08621/P09012/P14678/P62306/P62314/P62318/Q9Y383
GO:0005686	CC	U2 snRNP	7	20	9.19229e-12	O75533/P09661/P14678/P62314/P62318/Q13435/Q15459
GO:0005687	CC	U4 snRNP	4	9	1.02472e-07	P14678/P62306/P62314/P62318
GO:0005689	CC	U12-type spliceosomal complex	8	26	9.60226e-13	O75533/P14678/P62306/P62314/P62318/P67809/Q13435/Q15393
GO:0005694	CC	chromosome	9	152	1.68392e-07	P46063/Q08945/Q14683/Q14980/Q29RF7/Q5SSJ5/Q96GQ7/Q9UQE7/Q9Y5B9
GO:0005719	CC	nuclear euchromatin	3	29	0.000510981	P16403/P38159/Q9Y230
GO:0005720	CC	nuclear heterochromatin	4	25	9.60778e-06	O75475/P10412/P16401/P17987
GO:0005726	CC	perichromatin fibrils	1	4	0.021365	Q13148
GO:0005730	CC	nucleolus	104	1323	5.61991e-87	O00159/O00541/O14980/O60832/O75530/O76021/O76094/O95163/P05783/P06748/P09012/P09874/P11142/P11387/P12956/P13010/P17480/P17844/P18124/P19338/P21333/P23396/P25685/P26196/P29692/P30050/P31327/P32969/P36578/P38646/P39023/P39748/P40429/P42285/P42766/P46013/P46087/P46777/P46778/P46781/P46783/P48643/P49207/P51532/P52272/P53999/P55265/P55769/P61247/P62081/P62140/P62263/P62266/P62277/P62280/P62424/P62750/…
GO:0005737	CC	cytoplasm	261	8255	3.31027e-136	O00159/O00232/O00425/O00429/O00541/O00571/O14980/O43242/O43592/O43776/O60716/O60832/O60841/O75369/O75534/O76031/O76094/O95163/O95373/O95433/P00533/P00966/P02545/P04792/P05388/P05783/P05787/P06493/P06748/P07814/P08621/P08670/P08729/P09012/P09651/P0DMV9/P11172/P11216/P11498/P12081/P12268/P12270/P13639/P14618/P14866/P14868/P15880/P15924/P18124/P19525/P20042/P21333/P22234/P22626/P23246/P23396/P24534/…
GO:0005739	CC	mitochondrion	71	3730	4.67179e-20	O00429/O14949/O43776/O75964/O76031/O95831/P05141/P06493/P06576/P08559/P09874/P10515/P10620/P11021/P11498/P11586/P12081/P12236/P14618/P18077/P22695/P24539/P25705/P26196/P26640/P28331/P31689/P32322/P34897/P35232/P36542/P36776/P38646/P39748/P42704/P47897/P48047/P49207/P49792/P51398/P51610/P54136/P54886/P61221/P62263/P63244/Q00325/Q02218/Q06124/Q07021/Q12906/Q12931/Q15046/Q15165/Q16795/Q16891/Q6NZI2/…
GO:0005741	CC	mitochondrial outer membrane	7	210	0.000159111	O00429/O00571/O95573/P00966/P10620/Q96HS1/Q99623
GO:0005747	CC	mitochondrial respiratory chain complex I	3	75	0.00786634	P28331/Q16718/Q16795
GO:0005753	CC	mitochondrial proton-transporting ATP synthase complex	6	19	6.05213e-10	O75964/P06576/P24539/P25705/P36542/P48047
GO:0005754	CC	mitochondrial proton-transporting ATP synthase, catalytic core	1	1	0.00538451	P06576
GO:0005758	CC	mitochondrial intermembrane space	6	88	8.82942e-06	O95831/P28331/P34897/Q12931/Q8TCS8/Q9H4A6
GO:0005759	CC	mitochondrial matrix	25	378	1.44271e-19	O76031/P06576/P08559/P10515/P11498/P23396/P24539/P25705/P28331/P31327/P32322/P34897/P36542/P36776/P47897/P61221/Q02218/Q07021/Q12931/Q15046/Q16795/Q7L0Y3/Q96EY1/Q9NSE4/Q9Y2Z4
GO:0005768	CC	endosome	6	239	0.00200525	P00533/P07355/P24941/P50570/Q14C86/Q9H4A6
GO:0005770	CC	late endosome	4	131	0.00568495	P11142/P84077/Q5VYK3/Q7Z2W4
GO:0005778	CC	peroxisomal membrane	5	73	4.93167e-05	O95573/P10620/P12268/P28288/P84077
GO:0005783	CC	endoplasmic reticulum	28	1200	1.69739e-10	O00429/O43390/O76094/O95433/O95573/P00966/P04844/P10620/P11021/P16615/P27635/P50454/Q07065/Q12904/Q5VYK3/Q6DD88/Q6NZI2/Q86UP2/Q8NF37/Q8TCJ2/Q96A33/Q96AG4/Q9H8H3/Q9NR31/Q9NZ01/Q9P2E9/Q9UHB9/Q9Y4L1
GO:0005786	CC	signal recognition particle, endoplasmic reticulum targeting	3	13	4.26411e-05	O76094/P37108/Q9UHB9
GO:0005789	CC	endoplasmic reticulum membrane	32	1108	3.0136e-14	O00429/O14579/O15260/O95573/P00533/P04843/P04844/P10620/P11021/P16615/P35606/P42166/P46977/P48444/P53618/P53621/P55735/P62820/P67812/Q02809/Q07065/Q6DD88/Q86UP2/Q8NF37/Q8TEM1/Q96AG4/Q96N66/Q9H0U4/Q9NZ01/Q9Y3I0/Q9Y5M8/Q9Y678
GO:0005790	CC	smooth endoplasmic reticulum	2	34	0.0144869	P11021/Q9Y4L1
GO:0005791	CC	rough endoplasmic reticulum	4	62	0.000361979	P04843/P04844/P61619/Q96A33
GO:0005793	CC	endoplasmic reticulum-Golgi intermediate compartment	5	72	4.61422e-05	O15260/P11021/P50454/P53618/Q5VYK3
GO:0005794	CC	Golgi apparatus	23	1315	1.16577e-06	O00203/O00429/O14579/O75534/O95573/P17987/P18085/P48444/P50570/P52701/P53618/P62820/Q12904/Q13610/Q7Z2W4/Q86VP6/Q8NF37/Q9H0U4/Q9H4A6/Q9NR31/Q9P289/Q9Y265/Q9Y678
GO:0005798	CC	Golgi-associated vesicle	2	17	0.00373015	P53618/Q9P289
GO:0005802	CC	trans-Golgi network	4	179	0.0164305	P50570/P63010/P84077/Q9H4A6
GO:0005811	CC	lipid droplet	7	74	1.66042e-07	O95573/P07355/Q07065/Q12931/Q8NF37/Q9H8H3/Q9UMS4
GO:0005813	CC	centrosome	21	644	9.40588e-11	O43809/P06493/P06748/P17987/P24941/P25205/P48643/P50570/P50991/P57740/P61163/Q08211/Q14203/Q14204/Q14839/Q14980/Q16513/Q5T4S7/Q5VYK3/Q9NRG9/Q9P289
GO:0005815	CC	microtubule organizing center	11	264	2.57366e-07	O43809/O60610/P05783/P33176/P62081/Q13045/Q14498/Q8WUM4/Q9Y224/Q9Y265/Q9Y490
GO:0005819	CC	spindle	9	133	5.34877e-08	P04792/P35579/Q00610/Q08J23/Q14980/Q15019/Q16181/Q96T76/Q9UMS4
GO:0005826	CC	actomyosin contractile ring	1	4	0.021365	P35579
GO:0005829	CC	cytosol	260	3562	1.02162e-226	O00159/O00232/O00303/O00425/O00429/O00487/O14579/O14980/O15371/O43175/O43242/O43592/O43684/O43776/O60610/O60684/O60701/O60716/O60841/O60884/O75369/O75475/O76094/O95373/O95433/O95782/O95816/O95831/P00966/P02545/P04792/P05198/P05387/P05388/P06493/P06748/P07355/P07814/P07910/P08237/P08670/P0DMV9/P11142/P11172/P11498/P11586/P12081/P12268/P12956/P13010/P13639/P14618/P14678/P14868/P15880/P17858/P17980/…
GO:0005832	CC	chaperonin-containing T-complex	6	11	1.06891e-11	P17987/P40227/P48643/P49368/P50991/Q99832
GO:0005838	CC	proteasome regulatory particle	4	22	5.62742e-06	O00232/Q13200/Q15008/Q9UNM6
GO:0005840	CC	ribosome	18	576	3.98964e-09	P05198/P19525/P23396/P32969/P46781/P46783/P61313/P61353/P62081/P62266/P62277/P62280/P62701/P62829/Q8NE71/Q92616/Q9P2E9/Q9UHB9
GO:0005844	CC	polysome	7	39	1.66958e-09	P05198/P23396/P23588/P62701/P62753/Q92616/Q9Y295
GO:0005849	CC	mRNA cleavage factor complex	2	11	0.00154112	O43809/Q16630
GO:0005850	CC	eukaryotic translation initiation factor 2 complex	3	4	6.18338e-07	P05198/P20042/Q9BY44
GO:0005852	CC	eukaryotic translation initiation factor 3 complex	5	110	0.000341402	O00303/O15371/Q13347/Q14152/Q99613
GO:0005853	CC	eukaryotic translation elongation factor 1 complex	3	22	0.000221471	P24534/P29692/P68104
GO:0005874	CC	microtubule	22	622	7.07489e-12	O00429/P07437/P17987/P27816/P33176/P40227/P42704/P48643/P49368/P50570/P50991/P68363/P68371/Q14152/Q14203/Q14204/Q99832/Q9BQE3/Q9BUF5/Q9BVA1/Q9P258/Q9UHD8
GO:0005875	CC	microtubule associated complex	3	35	0.000893597	P27816/P49792/P61163
GO:0005876	CC	spindle microtubule	3	35	0.000893597	P06493/Q14980/Q9BZK7
GO:0005882	CC	intermediate filament	6	233	0.00176544	P02545/P05783/P05787/P08670/P08729/P15924
GO:0005886	CC	plasma membrane	57	6060	3.54438e-05	O00159/O60716/O75369/O75534/O76094/O95782/P00533/P04792/P06576/P07355/P08670/P11021/P11142/P13010/P13639/P14618/P15924/P21333/P23396/P25705/P27816/P35232/P35579/P39748/P40763/P41240/P46459/P48047/P49368/P50570/P50579/P52701/P53618/P63010/P68400/P84077/Q00341/Q00610/Q01844/Q07021/Q07065/Q09666/Q13177/Q13418/Q15046/Q15149/Q15165/Q16181/Q16513/Q29RF7/Q8NC51/Q9H4A6/Q9NZM1/Q9NZN4/Q9P258/Q9UBB4/Q9Y490
GO:0005901	CC	caveola	3	82	0.0100361	Q6NZI2/Q9NZM1/Q9NZN4
GO:0005903	CC	brush border	7	71	1.24424e-07	O00159/O00429/O75369/P35579/P60660/Q13045/Q15149
GO:0005911	CC	cell-cell junction	8	218	2.77238e-05	O60716/P05787/P07355/P21333/P41240/Q12792/Q13418/Q9Y490
GO:0005913	CC	cell-cell adherens junction	65	327	5.41373e-81	O00571/O60716/O75369/O76021/O95433/P00533/P05783/P07355/P11021/P11142/P13639/P14618/P15880/P21333/P22234/P25685/P26196/P26641/P29692/P33176/P35579/P41091/P42166/P49207/P50914/P51610/P54136/P61313/P61978/P62424/P62750/P62820/P62826/P63244/P78344/P83731/Q00341/Q01082/Q01813/Q02878/Q04637/Q09666/Q12792/Q13177/Q13813/Q14258/Q14C86/Q15019/Q15149/Q15365/Q16181/Q16513/Q6PKG0/Q7KZF4/Q7Z2W4/Q86UP2/Q8NC51/…
GO:0005925	CC	focal adhesion	62	462	5.10965e-66	O75369/P00533/P04792/P05387/P05388/P06748/P08670/P0DMV9/P11021/P11142/P15880/P18124/P21333/P23396/P30050/P32969/P35268/P35579/P35658/P36578/P38646/P39023/P40429/P46777/P46781/P46783/P50570/P61160/P61247/P61353/P61513/P61978/P62081/P62140/P62241/P62249/P62263/P62277/P62280/P62424/P62701/P62829/P62888/P62899/P62906/P62917/P63173/P84077/P84098/Q00610/Q02878/Q09666/Q12792/Q13045/Q13418/Q15149/Q15366/…
GO:0005930	CC	axoneme	4	85	0.00119202	P27816/Q15019/Q16181/Q9UHD8
GO:0005938	CC	cell cortex	4	125	0.00482193	O75369/P07355/P19338/Q14980
GO:0005945	CC	6-phosphofructokinase complex	2	3	8.65001e-05	P08237/P17858
GO:0005967	CC	mitochondrial pyruvate dehydrogenase complex	1	3	0.0160669	P10515
GO:0005980	BP	glycogen catabolic process	4	22	5.62742e-06	P08237/P11216/P31327/P35573
GO:0006002	BP	fructose 6-phosphate metabolic process	4	45	0.000103919	P08237/P17858/Q01813/Q06210
GO:0006006	BP	glucose metabolic process	3	100	0.017074	P08559/P10515/Q12904
GO:0006011	BP	UDP-glucose metabolic process	2	9	0.00101596	O60701/Q16851
GO:0006015	BP	5-phosphoribose 1-diphosphate biosynthetic process	2	4	0.000172382	P11908/P60891
GO:0006065	BP	UDP-glucuronate biosynthetic process	2	3	8.65001e-05	O60701/Q16851
GO:0006086	BP	acetyl-CoA biosynthetic process from pyruvate	2	10	0.00126543	P08559/P10515
GO:0006090	BP	pyruvate metabolic process	3	27	0.000412319	P08559/P10515/P11498
GO:0006091	BP	generation of precursor metabolites and energy	3	52	0.00281993	P06576/Q00325/Q02218
GO:0006099	BP	tricarboxylic acid cycle	3	105	0.0194104	P08559/P10515/Q02218
GO:0006164	BP	purine nucleotide biosynthetic process	2	21	0.00567845	P11586/P60891
GO:0006167	BP	AMP biosynthetic process	1	4	0.021365	P60891
GO:0006189	BP	'de novo' IMP biosynthetic process	2	24	0.00738404	P22102/P22234
GO:0006207	BP	'de novo' pyrimidine nucleobase biosynthetic process	3	28	0.000459955	P11172/P27708/P31327
GO:0006222	BP	UMP biosynthetic process	1	2	0.0107401	P11172
GO:0006259	BP	DNA metabolic process	4	33	3.00365e-05	P46013/P52292/P62826/Q96T76
GO:0006260	BP	DNA replication	16	361	2.05555e-10	P06493/P11387/P24941/P25205/P33991/P33992/P33993/P39748/P49736/P52948/Q08945/Q14566/Q92878/Q92900/Q96PK6/Q9Y5B9
GO:0006268	BP	DNA unwinding involved in DNA replication	4	14	7.9685e-07	P33991/P33993/P49736/Q14566
GO:0006270	BP	DNA replication initiation	7	81	3.10587e-07	P25205/P33991/P33992/P33993/P49643/P49736/Q14566
GO:0006273	BP	lagging strand elongation	1	4	0.021365	P09874
GO:0006281	BP	DNA repair	23	667	3.92352e-12	P06493/P06748/P09874/P23396/P24941/P39748/P43246/P46063/P52701/Q08945/Q14683/Q15233/Q29RF7/Q71UM5/Q92878/Q92900/Q96PK6/Q96T76/Q9P287/Q9UQE7/Q9Y230/Q9Y265/Q9Y5B9
GO:0006293	BP	nucleotide-excision repair, preincision complex stabilization	2	21	0.00567845	P09874/Q13619
GO:0006294	BP	nucleotide-excision repair, preincision complex assembly	2	29	0.0106713	P09874/Q13619
GO:0006295	BP	nucleotide-excision repair, DNA incision, 3'-to lesion	2	23	0.00679276	P09874/Q13619
GO:0006296	BP	nucleotide-excision repair, DNA incision, 5'-to lesion	2	38	0.0178993	P09874/Q13619
GO:0006302	BP	double-strand break repair	8	93	4.56524e-08	P09874/P13010/P39748/P43246/P78527/Q15645/Q92499/Q92878
GO:0006303	BP	double-strand break repair via nonhomologous end joining	7	59	3.37457e-08	O00487/P12956/P13010/P62805/P78527/Q92878/Q9UMS4
GO:0006310	BP	DNA recombination	7	151	1.99301e-05	P12956/P13010/Q15233/Q92878/Q96PK6/Q9Y230/Q9Y265
GO:0006311	BP	meiotic gene conversion	1	4	0.021365	P43246
GO:0006334	BP	nucleosome assembly	7	172	4.58058e-05	P06748/P10412/P16401/P16403/P49736/P62805/Q5SSJ5
GO:0006337	BP	nucleosome disassembly	3	17	9.97708e-05	P51532/Q92922/Q9Y5B9
GO:0006338	BP	chromatin remodeling	7	192	9.14167e-05	P11387/P35659/P51532/Q92769/Q92922/Q9Y230/Q9Y265
GO:0006344	BP	maintenance of chromatin silencing	1	4	0.021365	Q92769
GO:0006351	BP	transcription, DNA-templated	43	3159	4.14356e-08	O00571/O60716/O75475/O75530/P11142/P12956/P13010/P19525/P23246/P23396/P29692/P42704/P68104/P68400/Q01844/Q07021/Q07666/Q12905/Q12906/Q13045/Q13610/Q14498/Q14839/Q15233/Q15287/Q15424/Q16513/Q7KZF4/Q92499/Q92769/Q92841/Q92922/Q96PK6/Q96T76/Q99623/Q9BQG0/Q9BZK7/Q9UQ80/Q9Y224/Q9Y230/Q9Y265/Q9Y295/Q9Y3T9
GO:0006355	BP	regulation of transcription, DNA-templated	28	3419	0.0199471	O60716/O75475/O75534/P23396/P29692/P35232/P40763/P42166/P42704/P50570/P51610/P57740/P67809/P68104/P68400/Q01844/Q02878/Q08945/Q13045/Q14498/Q15233/Q16513/Q5SSJ5/Q6NZI2/Q7KZF4/Q92499/Q9BQG0/Q9BXP5
GO:0006357	BP	regulation of transcription by RNA polymerase II	9	642	0.00873268	O95163/P35659/P40763/P51532/P53999/Q14839/Q15424/Q92922/Q9Y265
GO:0006361	BP	transcription initiation from RNA polymerase I promoter	2	34	0.0144869	P17480/Q6NZI2
GO:0006363	BP	termination of RNA polymerase I transcription	2	35	0.0153107	P17480/Q6NZI2
GO:0006364	BP	rRNA processing	71	255	3.98329e-100	O00541/O60832/P05387/P05388/P15880/P18077/P18124/P18621/P23396/P26373/P27635/P30050/P32969/P35268/P36578/P38919/P39023/P40429/P42285/P42766/P46776/P46777/P46778/P46779/P46781/P46783/P49207/P50914/P55769/P60866/P61247/P61254/P61313/P61353/P61513/P62081/P62241/P62249/P62263/P62266/P62277/P62280/P62424/P62701/P62750/P62753/P62829/P62847/P62861/P62888/P62899/P62906/P62910/P62913/P62917/P63173/P83731/…
GO:0006366	BP	transcription by RNA polymerase II	12	340	4.35705e-07	P09874/P35659/P38159/P51610/P62195/P67809/P78347/Q08945/Q13148/Q15645/Q9NR30/Q9Y5B9
GO:0006368	BP	transcription elongation from RNA polymerase II promoter	3	108	0.0208927	O95163/Q08945/Q9Y5B9
GO:0006369	BP	termination of RNA polymerase II transcription	16	63	1.14799e-22	O43809/P14678/P26368/P38919/P62306/P62318/P84103/Q01081/Q01130/Q07955/Q13247/Q13838/Q15287/Q86V81/Q86W42/Q9BY77
GO:0006376	BP	mRNA splice site selection	4	40	6.51122e-05	O95232/Q07955/Q13247/Q9Y383
GO:0006382	BP	adenosine to inosine editing	1	4	0.021365	P55265
GO:0006388	BP	tRNA splicing, via endonucleolytic cleavage and ligation	3	30	0.000565493	Q92499/Q9Y224/Q9Y3I0
GO:0006396	BP	RNA processing	11	230	6.44453e-08	O15042/O60832/P14866/P31943/P61978/Q00839/Q08211/Q13310/Q14498/Q7L2E3/Q92841
GO:0006397	BP	mRNA processing	28	281	1.20801e-26	O43390/O43809/P08621/P09651/P18583/P22626/P23246/P26368/P55265/Q01081/Q01130/Q07021/Q07666/Q07955/Q12874/Q13148/Q13151/Q13435/Q14498/Q15029/Q15233/Q15393/Q15459/Q16630/Q53GS9/Q6P2Q9/Q9H0S4/Q9Y2W1
GO:0006401	BP	RNA catabolic process	4	38	5.30404e-05	P42285/Q13310/Q7KZF4/Q8TCS8
GO:0006403	BP	RNA localization	1	2	0.0107401	O94906
GO:0006404	BP	RNA import into nucleus	1	1	0.00538451	P12270
GO:0006405	BP	RNA export from nucleus	17	54	8.09547e-26	O75694/P09651/P12270/P26368/P35658/P38919/P52948/P84103/Q01081/Q01130/Q07955/Q13247/Q13838/Q15287/Q86V81/Q86W42/Q9BY77
GO:0006406	BP	mRNA export from nucleus	23	125	1.82369e-28	O75694/P12270/P22626/P26368/P35658/P38919/P49792/P52948/P57740/P84103/Q01081/Q01130/Q07955/Q13247/Q13838/Q15287/Q86V81/Q86W42/Q8TEM1/Q92900/Q9BY77/Q9NRG9/Q9NUU7
GO:0006409	BP	tRNA export from nucleus	10	32	1.08916e-15	O43592/O75694/P12270/P35658/P49792/P52948/P57740/P62826/Q8TEM1/Q9NRG9
GO:0006412	BP	translation	70	772	1.98857e-62	O00425/P00533/P05141/P05387/P05388/P12081/P12236/P14868/P15880/P18077/P18124/P18621/P19525/P23396/P26373/P26639/P27635/P30050/P32969/P35268/P36578/P39023/P40429/P42766/P46776/P46777/P46778/P46779/P46781/P46783/P49207/P50914/P60866/P61247/P61254/P61313/P61353/P61513/P62081/P62241/P62249/P62263/P62266/P62277/P62280/P62424/P62701/P62750/P62753/P62829/P62847/P62861/P62888/P62899/P62906/P62910/P62913/…
GO:0006413	BP	translational initiation	69	128	2.99102e-122	O00303/O15371/P05198/P05387/P05388/P15880/P18077/P18124/P18621/P20042/P23396/P23588/P26373/P27635/P30050/P32969/P35268/P36578/P39023/P40429/P41091/P42766/P46776/P46777/P46778/P46779/P46781/P46783/P49207/P50914/P60842/P60866/P61221/P61247/P61254/P61313/P61353/P61513/P62081/P62241/P62249/P62263/P62266/P62277/P62280/P62424/P62701/P62750/P62753/P62829/P62847/P62861/P62888/P62899/P62906/P62910/P62913/…
GO:0006414	BP	translational elongation	6	19	6.05213e-10	P05387/P13639/P24534/P26641/P29692/P68104
GO:0006415	BP	translational termination	2	6	0.000427882	P61221/P62495
GO:0006417	BP	regulation of translation	5	56	1.35207e-05	P26196/P63173/Q92616/Q9BY44/Q9UQ80
GO:0006418	BP	tRNA aminoacylation for protein translation	18	101	2.65803e-22	O43776/P07814/P12081/P14868/P26639/P26640/P41252/P47897/P54136/P54577/P56192/Q12904/Q13155/Q15046/Q9NSE4/Q9P2J5/Q9Y285/Q9Y2Z4
GO:0006428	BP	isoleucyl-tRNA aminoacylation	2	10	0.00126543	P41252/Q9NSE4
GO:0006430	BP	lysyl-tRNA aminoacylation	1	2	0.0107401	Q15046
GO:0006433	BP	prolyl-tRNA aminoacylation	1	3	0.0160669	P07814
GO:0006437	BP	tyrosyl-tRNA aminoacylation	1	4	0.021365	P54577
GO:0006438	BP	valyl-tRNA aminoacylation	2	18	0.00418152	P26640/P54577
GO:0006446	BP	regulation of translational initiation	12	113	1.57938e-12	O00303/O15371/O60841/P04792/P23588/P60842/P78344/Q04637/Q13347/Q14152/Q92499/Q99613
GO:0006449	BP	regulation of translational termination	2	6	0.000427882	P62495/Q92900
GO:0006457	BP	protein folding	16	499	2.03919e-08	O76031/O95816/P11142/P17987/P31689/P38646/P40227/P48643/P49368/P49792/P50991/P68400/Q58FG1/Q96EY1/Q99832/Q9Y230
GO:0006464	BP	cellular protein modification process	4	143	0.00770725	P04843/P04844/P78527/Q02809
GO:0006468	BP	protein phosphorylation	10	338	1.83154e-05	O95163/P19525/P41240/P68400/Q12906/Q13177/Q13418/Q16513/Q9BY44/Q9P289
GO:0006469	BP	negative regulation of protein kinase activity	4	100	0.00216701	P04792/Q13177/Q13418/Q96EY1
GO:0006479	BP	protein methylation	3	56	0.00348133	P14678/P62318/P62495
GO:0006509	BP	membrane protein ectodomain proteolysis	2	30	0.0113931	P35579/P38159
GO:0006513	BP	protein monoubiquitination	2	29	0.0106713	Q14258/Q7Z6Z7
GO:0006521	BP	regulation of cellular amino acid metabolic process	15	51	2.01795e-22	O00232/O00487/O43242/P17980/P25789/P28070/P35998/P43686/P62191/P62195/P62333/Q13200/Q15008/Q16401/Q9UNM6
GO:0006526	BP	arginine biosynthetic process	3	17	9.97708e-05	P00966/P27708/P31327
GO:0006541	BP	glutamine metabolic process	4	59	0.000299108	O43175/P27708/P31327/Q06210
GO:0006544	BP	glycine metabolic process	3	27	0.000412319	O43175/P22102/P34897
GO:0006561	BP	proline biosynthetic process	2	33	0.0136829	P32322/P54886
GO:0006564	BP	L-serine biosynthetic process	2	16	0.00330305	O43175/P34897
GO:0006566	BP	threonine metabolic process	1	1	0.00538451	O43175
GO:0006592	BP	ornithine biosynthetic process	1	1	0.00538451	P54886
GO:0006606	BP	protein import into nucleus	10	81	2.50602e-11	O75694/O95373/P12270/P35658/P40763/P55060/P55265/P57740/P62826/Q96P70
GO:0006607	BP	NLS-bearing protein import into nucleus	4	23	6.78311e-06	O60684/P49792/P52292/Q92973
GO:0006610	BP	ribosomal protein import into nucleus	2	8	0.000793022	P62829/Q92973
GO:0006611	BP	protein export from nucleus	7	27	1.01927e-10	O14980/P35658/P38646/P55265/P62826/Q9HAV4/Q9UIA9
GO:0006614	BP	SRP-dependent cotranslational protein targeting to membrane	60	126	8.02738e-102	O76094/P05387/P05388/P15880/P18077/P18124/P18621/P23396/P26373/P27635/P30050/P32969/P35268/P36578/P37108/P39023/P40429/P42766/P46776/P46777/P46778/P46779/P46781/P46783/P49207/P50914/P60866/P61247/P61254/P61313/P61353/P61513/P61619/P62081/P62241/P62249/P62263/P62266/P62277/P62280/P62424/P62701/P62750/P62753/P62829/P62847/P62861/P62888/P62899/P62906/P62910/P62913/P62917/P63173/P83731/P84098/Q02878/…
GO:0006754	BP	ATP biosynthetic process	6	29	1.01231e-08	O75964/P06576/P24539/P25705/P36542/P48047
GO:0006835	BP	dicarboxylic acid transport	1	2	0.0107401	Q9UBX3
GO:0006886	BP	intracellular protein transport	15	836	6.26876e-05	O00203/O43592/O95782/P06748/P35606/P46459/P48444/P53618/P53621/P55735/P63010/Q00610/Q9BXS5/Q9NR31/Q9Y678
GO:0006888	BP	ER to Golgi vesicle-mediated transport	15	230	3.36259e-12	O14579/P18085/P35606/P46459/P48444/P53618/P53621/P62820/Q01082/Q13813/Q14203/Q14204/Q9H0U4/Q9Y4L1/Q9Y678
GO:0006890	BP	retrograde vesicle-mediated transport, Golgi to ER	11	92	3.59988e-12	O14579/O15260/P18085/P35606/P46459/P48444/P53618/P53621/P62820/Q9H0U4/Q9Y678
GO:0006891	BP	intra-Golgi vesicle-mediated transport	5	44	4.05392e-06	O14579/P35606/P46459/P53618/P53621
GO:0006897	BP	endocytosis	6	269	0.00359131	O00429/O95782/P50570/P62820/Q14C86/Q9NZN4
GO:0006913	BP	nucleocytoplasmic transport	4	38	5.30404e-05	P06748/P52948/Q9BQG0/Q9NRG9
GO:0006915	BP	apoptotic process	16	872	2.76634e-05	O95831/P06493/P12236/P23396/P54577/P55060/P68400/Q07021/Q12904/Q13155/Q13177/Q16513/Q86W42/Q8WUM4/Q96KA5/Q9Y3T9
GO:0006919	BP	activation of cysteine-type endopeptidase activity involved in apoptotic process	3	97	0.0157524	O95831/P63244/Q96EY1
GO:0006921	BP	cellular component disassembly involved in execution phase of apoptosis	2	20	0.00515593	O00429/Q9P289
GO:0006924	BP	activation-induced cell death of T cells	2	8	0.000793022	P62753/Q96EY1
GO:0006928	BP	movement of cell or subcellular component	7	86	4.68943e-07	P04792/P07437/P08670/P40763/P61160/P68371/Q9Y490
GO:0006950	BP	response to stress	5	108	0.00031368	O95433/P00533/P06748/Q12931/Q58FG1
GO:0006974	BP	cellular response to DNA damage stimulus	7	264	0.000629531	P09874/P23396/P33993/Q13619/Q71UM5/Q92878/Q96T76
GO:0006977	BP	DNA damage response, signal transduction by p53 class mediator resulting in cell cycle arrest	3	63	0.00485083	P06493/P06748/P24941
GO:0006983	BP	ER overload response	2	11	0.00154112	P11021/Q96A33
GO:0006984	BP	ER-nucleus signaling pathway	1	2	0.0107401	P16615
GO:0006986	BP	response to unfolded protein	6	44	1.40488e-07	P04792/P11142/P25685/P31689/P50454/Q8TCJ2
GO:0006999	BP	nuclear pore organization	2	6	0.000427882	P12270/P52948
GO:0007000	BP	nucleolus organization	2	5	0.000286277	O00541/Q14978
GO:0007004	BP	telomere maintenance via telomerase	2	18	0.00418152	O60832/Q92878
GO:0007005	BP	mitochondrion organization	8	96	5.86083e-08	O00429/P06576/P09874/P35232/P36776/P51610/Q96EY1/Q99623
GO:0007016	BP	cytoskeletal anchoring at plasma membrane	2	33	0.0136829	O75369/Q9Y490
GO:0007017	BP	microtubule-based process	6	173	0.00037846	P07437/P68363/P68371/Q9BQE3/Q9BUF5/Q9BVA1
GO:0007029	BP	endoplasmic reticulum organization	3	29	0.000510981	P61619/Q6DD88/Q96A33
GO:0007030	BP	Golgi organization	4	90	0.00147287	O15260/P62820/Q6DD88/Q9H4A6
GO:0007049	BP	cell cycle	10	386	5.59517e-05	P05783/P49736/P51610/P63244/Q14978/Q16513/Q53GS9/Q8WUM4/Q9P287/Q9UHD8
GO:0007050	BP	cell cycle arrest	7	199	0.000114189	P43246/P78344/Q07666/Q13418/Q13619/Q969Z0/Q9UQ80
GO:0007052	BP	mitotic spindle organization	5	38	1.9242e-06	P27816/P62826/Q14204/Q14683/Q9UQE7
GO:0007059	BP	chromosome segregation	5	93	0.00015623	O00571/P05141/P11387/P23396/Q96T76
GO:0007062	BP	sister chromatid cohesion	11	103	1.26663e-11	O14980/O43684/P49792/P52948/P55735/P57740/Q14683/Q29RF7/Q99623/Q9P258/Q9UQE7
GO:0007064	BP	mitotic sister chromatid cohesion	3	38	0.00113808	Q14683/Q29RF7/Q9UQE7
GO:0007077	BP	mitotic nuclear envelope disassembly	10	44	3.95426e-14	O75694/P02545/P06493/P12270/P35658/P49792/P52948/P57740/Q8TEM1/Q9NRG9
GO:0007093	BP	mitotic cell cycle checkpoint	3	52	0.00281993	P62753/P83731/Q14683
GO:0007094	BP	mitotic spindle assembly checkpoint	2	38	0.0178993	O43684/P12270
GO:0007098	BP	centrosome cycle	2	7	0.000596896	P06493/P06748
GO:0007131	BP	reciprocal meiotic recombination	4	45	0.000103919	P43246/P52701/Q15645/Q92878
GO:0007165	BP	signal transduction	18	1816	0.0107179	O75369/O95373/P00533/P06748/P35232/P35659/P40763/P50570/P61978/P62826/P68400/P78347/Q07666/Q12904/Q13177/Q14C86/Q16513/Q9UQE7
GO:0007173	BP	epidermal growth factor receptor signaling pathway	4	59	0.000299108	P00533/P18085/P41240/Q06124
GO:0007339	BP	binding of sperm to zona pellucida	6	44	1.40488e-07	P17987/P48643/P49368/P50991/Q14157/Q99832
GO:0007344	BP	pronuclear fusion	1	1	0.00538451	P06493
GO:0007369	BP	gastrulation	2	25	0.00799771	P62753/P63244
GO:0007399	BP	nervous system development	6	369	0.0156046	P40763/P51532/P60891/Q14203/Q92922/Q9UBB4
GO:0007420	BP	brain development	11	243	1.12307e-07	O15031/O43175/O60716/O95573/P12956/P13010/P18085/P41240/P47897/P78527/Q06124
GO:0007494	BP	midgut development	3	10	1.81081e-05	P00533/P00966/P31327
GO:0007568	BP	aging	7	220	0.000211451	P00966/P04844/P05198/P13639/P36776/P40763/Q9HB71
GO:0007569	BP	cell aging	4	34	3.38966e-05	P06493/P06748/Q13418/Q96EY1
GO:0007595	BP	lactation	3	55	0.00330792	P05388/P11172/P27708
GO:0007623	BP	circadian rhythm	5	96	0.000181332	O43390/P00533/P11387/Q15233/Q9Y2W1
GO:0008017	MF	microtubule binding	7	123	5.22326e-06	O00429/P23396/P27816/P33176/P42704/P50570/Q9P258
GO:0008022	MF	protein C-terminus binding	11	129	1.49006e-10	P08237/P08670/P12956/P13010/P16615/P19338/P35232/P41240/P43246/P46013/Q99623
GO:0008079	MF	translation termination factor activity	1	1	0.00538451	P62495
GO:0008091	CC	spectrin	2	21	0.00567845	Q01082/Q13813
GO:0008097	MF	5S rRNA binding	3	12	3.29328e-05	P13639/P39023/P46777
GO:0008134	MF	transcription factor binding	13	248	1.36698e-09	O00571/P09874/P21333/P23396/P40763/P51532/P62195/P78527/Q07021/Q92769/Q96EY1/Q9BQG0/Q9Y295
GO:0008135	MF	translation factor activity, RNA binding	8	27	1.35811e-12	P20042/P29692/P41091/P60842/P78344/Q04637/Q8NE71/Q92616
GO:0008139	MF	nuclear localization sequence binding	5	28	3.93859e-07	O60684/P35658/P52292/P52948/Q92973
GO:0008143	MF	poly(A) binding	5	13	5.51333e-09	O00571/P38919/Q07666/Q13310/Q92499
GO:0008186	MF	RNA-dependent ATPase activity	2	4	0.000172382	Q13838/Q92841
GO:0008187	MF	poly-pyrimidine tract binding	1	2	0.0107401	P26368
GO:0008190	MF	eukaryotic initiation factor 4E binding	3	18	0.000119246	O00571/Q04637/Q6PKG0
GO:0008250	CC	oligosaccharyltransferase complex	4	21	4.62396e-06	P04843/P04844/P46977/Q8TCJ2
GO:0008266	MF	poly(U) RNA binding	5	15	1.27505e-08	P07910/P31943/Q07666/Q13310/Q8TCS8
GO:0008283	BP	cell proliferation	18	420	2.63874e-11	O00541/O60832/P00533/P06493/P13010/P33993/P40763/P46013/P55060/P62750/P78527/Q07666/Q13418/Q6PKG0/Q9BVP2/Q9BXP5/Q9H4A6/Q9UQ80
GO:0008284	BP	positive regulation of cell proliferation	15	575	7.68368e-07	O60884/P00533/P05141/P06748/P24941/P34897/P40763/P46087/P46781/P62701/P68400/Q13418/Q13619/Q92769/Q969Z0
GO:0008285	BP	negative regulation of cell proliferation	8	534	0.00902077	P06748/P19525/P35232/P40763/P41240/Q13155/Q13619/Q96EY1
GO:0008309	MF	double-stranded DNA exodeoxyribonuclease activity	1	2	0.0107401	P39748
GO:0008312	MF	7S RNA binding	3	25	0.000326821	O76094/P37108/Q9UHB9
GO:0008334	BP	histone mRNA metabolic process	3	12	3.29328e-05	P14678/P62306/P62318
GO:0008340	BP	determination of adult lifespan	2	15	0.00290048	P43246/P52701
GO:0008360	BP	regulation of cell shape	4	174	0.0149629	O15031/O60610/P35579/Q7L576
GO:0008380	BP	RNA splicing	30	218	9.57489e-33	O94906/O95232/P07910/P08621/P09661/P14678/P18583/P23246/P38919/P62306/P62314/P62318/Q01081/Q01130/Q07021/Q12874/Q13148/Q13435/Q13838/Q14498/Q15029/Q15233/Q15287/Q15393/Q53GS9/Q6P2Q9/Q86W42/Q9BUQ8/Q9H0S4/Q9Y2W1
GO:0008426	MF	protein kinase C inhibitor activity	1	4	0.021365	P04792
GO:0008494	MF	translation activator activity	3	9	1.27267e-05	Q6PKG0/Q71UM5/Q8NE71
GO:0008536	MF	Ran GTPase binding	5	18	3.58968e-08	O43592/O95373/P49792/Q9HAV4/Q9UIA9
GO:0008540	CC	proteasome regulatory particle, base subcomplex	7	13	2.10223e-13	P17980/P35998/P43686/P62191/P62195/P62333/Q13200
GO:0008541	CC	proteasome regulatory particle, lid subcomplex	4	18	2.39463e-06	O00232/O00487/O43242/Q9UNM6
GO:0008543	BP	fibroblast growth factor receptor signaling pathway	4	115	0.00358705	P09651/P31943/P52272/Q06124
GO:0008544	BP	epidermis development	3	94	0.0144907	P15924/P16615/Q02809
GO:0008565	MF	protein transporter activity	7	176	5.29723e-05	O60684/O95373/O95782/P52292/P63010/Q92973/Q96P70
GO:0008584	BP	male gonad development	3	112	0.022963	O75534/P20042/P43246
GO:0008607	MF	phosphorylase kinase regulator activity	1	4	0.021365	O95163
GO:0008625	BP	extrinsic apoptotic signaling pathway via death domain receptors	2	42	0.0216156	O00571/Q9H0S4
GO:0008652	BP	cellular amino acid biosynthetic process	2	33	0.0136829	P32322/P54886
GO:0008656	MF	cysteine-type endopeptidase activator activity involved in apoptotic process	2	17	0.00373015	P63244/Q71UM5
GO:0008732	MF	L-allo-threonine aldolase activity	1	3	0.0160669	P34897
GO:0009019	MF	tRNA (guanine-N1-)-methyltransferase activity	1	1	0.00538451	Q7L0Y3
GO:0009069	BP	serine family amino acid metabolic process	1	2	0.0107401	P11586
GO:0009070	BP	serine family amino acid biosynthetic process	2	2	2.89369e-05	O43175/P11586
GO:0009113	BP	purine nucleobase biosynthetic process	2	15	0.00290048	P22102/P22234
GO:0009165	BP	nucleotide biosynthetic process	2	35	0.0153107	P11908/Q14558
GO:0009168	BP	purine ribonucleoside monophosphate biosynthetic process	3	18	0.000119246	P12268/P22102/P22234
GO:0009257	BP	10-formyltetrahydrofolate biosynthetic process	1	1	0.00538451	P11586
GO:0009299	BP	mRNA transcription	2	7	0.000596896	P17844/P29692
GO:0009328	CC	phenylalanine-tRNA ligase complex	1	2	0.0107401	Q9Y285
GO:0009368	CC	endopeptidase Clp complex	1	2	0.0107401	O76031
GO:0009383	MF	rRNA (cytosine-C5-)-methyltransferase activity	1	1	0.00538451	P46087
GO:0009386	BP	translational attenuation	1	2	0.0107401	Q12931
GO:0009408	BP	response to heat	4	75	0.000746442	O60884/O75475/P31689/Q96EY1
GO:0009448	BP	gamma-aminobutyric acid metabolic process	1	4	0.021365	O43175
GO:0009615	BP	response to virus	9	142	9.40589e-08	O00571/P04792/P19525/P26641/P48643/P55265/Q7Z2W4/Q92499/Q9NR30
GO:0009636	BP	response to toxic substance	5	107	0.000300476	O95831/P06493/P19525/P31327/Q15165
GO:0009725	BP	response to hormone	3	44	0.00174452	P36776/Q96PK6/Q96T76
GO:0009841	CC	mitochondrial endopeptidase Clp complex	1	1	0.00538451	O76031
GO:0009986	CC	cell surface	11	650	0.000931121	O15031/P00533/P06576/P07355/P11021/P35232/Q00839/Q07021/Q12904/Q99623/Q9Y490
GO:0010032	BP	meiotic chromosome condensation	2	6	0.000427882	Q15021/Q9NTJ3
GO:0010043	BP	response to zinc ion	2	42	0.0216156	P00966/P31327
GO:0010046	BP	response to mycotoxin	1	4	0.021365	P00966
GO:0010265	BP	SCF complex assembly	1	2	0.0107401	Q86VP6
GO:0010332	BP	response to gamma radiation	2	37	0.0170172	P09874/P78527
GO:0010467	BP	gene expression	17	49	1.14366e-26	O00425/O43390/P07910/P09651/P14866/P22626/P31943/P38159/P51991/P52272/P55795/P61978/Q00839/Q13151/Q15365/Q15366/Q9H4A6
GO:0010494	CC	cytoplasmic stress granule	6	41	9.07184e-08	O00571/P05198/P26196/P67809/Q13310/Q92499
GO:0010501	BP	RNA secondary structure unwinding	14	44	1.43078e-21	O00571/P17844/P26196/P38919/P60842/Q13838/Q7L014/Q92499/Q92841/Q96GQ7/Q9BUQ8/Q9H0S4/Q9NR30/Q9NUU7
GO:0010510	BP	regulation of acetyl-CoA biosynthetic process from pyruvate	2	13	0.00217006	P08559/P10515
GO:0010628	BP	positive regulation of gene expression	9	284	2.8032e-05	O00571/P06493/P08670/P0DMV9/P23396/P35232/P40763/P51610/Q00839
GO:0010638	BP	positive regulation of organelle organization	1	4	0.021365	O15260
GO:0010730	BP	negative regulation of hydrogen peroxide biosynthetic process	1	2	0.0107401	P40763
GO:0010762	BP	regulation of fibroblast migration	2	14	0.00252272	O94776/Q9P258
GO:0010821	BP	regulation of mitochondrion organization	2	12	0.00184276	O00429/Q9H4A6
GO:0010824	BP	regulation of centrosome duplication	3	19	0.000141038	O14980/Q8WUM4/Q9UHD1
GO:0010827	BP	regulation of glucose transmembrane transport	8	34	1.0746e-11	O75694/P12270/P35658/P49792/P52948/P57740/Q8TEM1/Q9NRG9
GO:0010965	BP	regulation of mitotic sister chromatid separation	1	1	0.00538451	P12270
GO:0010988	BP	regulation of low-density lipoprotein particle clearance	1	4	0.021365	P61978
GO:0010990	BP	regulation of SMAD protein complex assembly	1	2	0.0107401	P09874
GO:0012501	BP	programmed cell death	2	7	0.000596896	P11387/P14618
GO:0014038	BP	regulation of Schwann cell differentiation	1	1	0.00538451	P06493
GO:0014069	CC	postsynaptic density	4	165	0.0125359	P46459/P50570/P84077/Q96HC4
GO:0014070	BP	response to organic cyclic compound	5	66	3.02647e-05	O95573/P06493/P28288/P38919/P46013
GO:0014075	BP	response to amine	3	12	3.29328e-05	P06493/P27708/P31327
GO:0014801	CC	longitudinal sarcoplasmic reticulum	1	2	0.0107401	P16615
GO:0014886	BP	transition between slow and fast fiber	1	3	0.0160669	P78347
GO:0015030	CC	Cajal body	7	47	6.57764e-09	O14980/P24941/Q01081/Q14978/Q15029/Q7L014/Q9UQ35
GO:0015031	BP	protein transport	11	542	0.000207195	O14579/P18085/P35579/P84077/Q8TEM1/Q8WUM4/Q96D46/Q9H0U4/Q9NRG9/Q9NUU7/Q9P2E9
GO:0015207	MF	adenine transmembrane transporter activity	2	3	8.65001e-05	P05141/P12236
GO:0015629	CC	actin cytoskeleton	11	353	4.32688e-06	O75369/P21333/P26639/P35579/P61160/Q09666/Q12792/Q15019/Q16181/Q96HC4/Q9UHD8
GO:0015630	CC	microtubule cytoskeleton	9	222	3.94806e-06	O00429/P27816/P34897/P49736/P61163/Q13813/Q14498/Q15046/Q16181
GO:0015631	MF	tubulin binding	2	39	0.0188005	P12270/P23396
GO:0015910	BP	peroxisomal long-chain fatty acid import	1	4	0.021365	P28288
GO:0015932	MF	nucleobase-containing compound transmembrane transporter activity	1	1	0.00538451	O43592
GO:0015935	CC	small ribosomal subunit	6	61	1.02274e-06	P62249/P62701/P62753/P62847/P62861/P63244
GO:0015966	BP	diadenosine tetraphosphate biosynthetic process	1	2	0.0107401	Q15046
GO:0016020	CC	membrane	243	3201	9.33009e-214	O00159/O00203/O00232/O00303/O00429/O00541/O14980/O15371/O43242/O60684/O60884/O75643/O75694/O76021/O94776/O94906/O95373/O95573/O95782/P00533/P04843/P04844/P05141/P05198/P05387/P05388/P06493/P06576/P06748/P07355/P07814/P07910/P09651/P09874/P11021/P11142/P11216/P11586/P12268/P12956/P13010/P13639/P14866/P14868/P15880/P16615/P17844/P17858/P17980/P18077/P18085/P18124/P19338/P19525/P20700/P21333/P22234/…
GO:0016032	BP	viral process	44	376	2.51818e-44	O14980/O75694/O95373/P05141/P05783/P05787/P06748/P08670/P08729/P09651/P11142/P11387/P12270/P17980/P25789/P28070/P35658/P35998/P40763/P49792/P52701/P52948/P53618/P57740/P60842/P61221/P61978/P62826/P63244/Q04637/Q07021/Q13177/Q13435/Q13619/Q15046/Q5T4S7/Q7KZF4/Q8TEM1/Q92878/Q92973/Q9BXS5/Q9NRG9/Q9Y224/Q9Y490
GO:0016071	BP	mRNA metabolic process	1	4	0.021365	Q15366
GO:0016233	BP	telomere capping	2	14	0.00252272	P62805/P78527
GO:0016234	CC	inclusion body	3	21	0.000192037	P0DMV9/P43686/P62195
GO:0016259	BP	selenocysteine metabolic process	1	4	0.021365	P38919
GO:0016281	CC	eukaryotic translation initiation factor 4F complex	4	9	1.02472e-07	P23588/P60842/P78344/Q04637
GO:0016282	CC	eukaryotic 43S preinitiation complex	5	56	1.35207e-05	O00303/O15371/Q13347/Q14152/Q99613
GO:0016310	BP	phosphorylation	3	32	0.000685352	P11387/P40763/Q13177
GO:0016323	CC	basolateral plasma membrane	4	201	0.0239402	O95782/P00533/P07355/P15924
GO:0016344	BP	meiotic chromosome movement towards spindle pole	1	3	0.0160669	P61160
GO:0016363	CC	nuclear matrix	14	108	1.27125e-15	O43592/P05787/P20700/P23246/P27708/P43243/P52272/Q13838/Q14980/Q15233/Q99623/Q9UQE7/Q9Y230/Q9Y265
GO:0016428	MF	tRNA (cytosine-5-)-methyltransferase activity	1	3	0.0160669	Q08J23
GO:0016442	CC	RISC complex	2	28	0.00997054	P26196/Q7KZF4
GO:0016446	BP	somatic hypermutation of immunoglobulin genes	2	16	0.00330305	P43246/P52701
GO:0016447	BP	somatic recombination of immunoglobulin gene segments	2	4	0.000172382	P43246/P52701
GO:0016461	CC	unconventional myosin complex	2	9	0.00101596	O00159/P60660
GO:0016476	BP	regulation of embryonic cell shape	1	3	0.0160669	Q16181
GO:0016477	BP	cell migration	5	295	0.0224979	P06493/P18085/P41240/P62820/Q9H4A6
GO:0016479	BP	negative regulation of transcription by RNA polymerase I	1	1	0.00538451	P21333
GO:0016482	BP	cytosolic transport	1	3	0.0160669	P61160
GO:0016553	BP	base conversion or substitution editing	1	4	0.021365	P55265
GO:0016575	BP	histone deacetylation	4	28	1.53531e-05	P35232/Q92769/Q96PK6/Q9BZK7
GO:0016580	CC	Sin3 complex	2	11	0.00154112	P68400/Q92769
GO:0016581	CC	NuRD complex	4	25	9.60778e-06	O94776/P68400/Q14839/Q92769
GO:0016584	BP	nucleosome positioning	2	9	0.00101596	P10412/P16403
GO:0016597	MF	amino acid binding	3	46	0.00198369	P00966/P34897/Q15046
GO:0016607	CC	nuclear speck	31	209	7.5699e-35	O00571/O75533/O94906/O95232/P02545/P08621/P18583/P26368/P38919/P84103/Q01081/Q01130/Q07955/Q12874/Q13148/Q13247/Q13838/Q14498/Q15029/Q15233/Q15287/Q6P2Q9/Q7L014/Q86V81/Q86W42/Q9BY77/Q9UMS4/Q9UQ35/Q9Y2W1/Q9Y2W2/Q9Y383
GO:0016887	MF	ATPase activity	24	371	1.28586e-18	O00571/O76031/P0DMV9/P11021/P11142/P17980/P28288/P35579/P35998/P43246/P43686/P46459/P61221/P62191/P62195/P62333/Q13838/Q14204/Q15008/Q8NE71/Q92878/Q9NUQ8/Q9UG63/Q9Y265
GO:0016925	BP	protein sumoylation	14	124	9.15042e-15	O75694/P07910/P09874/P11387/P12270/P35658/P49792/P52948/P57740/P61978/Q14683/Q8TEM1/Q9NRG9/Q9UQE7
GO:0017018	MF	myosin phosphatase activity	1	4	0.021365	P62140
GO:0017025	MF	TBP-class protein binding	6	15	1.13701e-10	P17980/P35998/P43686/P62191/P62195/P62333
GO:0017056	MF	structural constituent of nuclear pore	4	38	5.30404e-05	O75694/P35658/P52948/P57740
GO:0017070	MF	U6 snRNA binding	2	14	0.00252272	Q13838/Q6P2Q9
GO:0017084	MF	delta1-pyrroline-5-carboxylate synthetase activity	1	1	0.00538451	P54886
GO:0017091	MF	AU-rich element binding	3	17	9.97708e-05	O43809/Q13151/Q15717
GO:0017099	MF	very-long-chain-acyl-CoA dehydrogenase activity	1	3	0.0160669	Q9NZ01
GO:0017101	CC	aminoacyl-tRNA synthetase multienzyme complex	4	4	8.30866e-10	P07814/P54136/Q12904/Q15046
GO:0017102	CC	methionyl glutamyl tRNA synthetase complex	1	1	0.00538451	Q12904
GO:0017148	BP	negative regulation of translation	9	55	1.81123e-11	O00425/O00571/P07814/P19525/P23396/P38919/P40429/P63244/Q12906
GO:0017160	MF	Ral GTPase binding	2	12	0.00184276	O00159/P21333
GO:0017166	MF	vinculin binding	2	10	0.00126543	Q9Y3I0/Q9Y490
GO:0018105	BP	peptidyl-serine phosphorylation	6	139	0.000116136	P06493/P24941/P78527/Q13177/Q13418/Q16513
GO:0018279	BP	protein N-linked glycosylation via asparagine	4	43	8.68098e-05	P04843/P04844/P46977/Q8TCJ2
GO:0019003	MF	GDP binding	3	55	0.00330792	P60891/P62826/P84077
GO:0019046	BP	release from viral latency	1	3	0.0160669	P51610
GO:0019068	BP	virion assembly	2	15	0.00290048	P62820/Q9H0U4
GO:0019074	BP	viral RNA genome packaging	2	2	2.89369e-05	P11498/P26196
GO:0019083	BP	viral transcription	63	111	1.28089e-113	O75694/P05387/P05388/P12270/P15880/P18077/P18124/P18621/P23396/P26373/P27635/P30050/P32969/P35268/P35658/P36578/P39023/P40429/P42766/P46776/P46777/P46778/P46779/P46781/P46783/P49207/P49792/P50914/P52948/P57740/P60866/P61247/P61254/P61313/P61353/P61513/P62081/P62241/P62249/P62263/P62266/P62277/P62280/P62424/P62701/P62750/P62753/P62829/P62847/P62861/P62888/P62899/P62906/P62910/P62913/P62917/P63173/…
GO:0019207	MF	kinase regulator activity	1	2	0.0107401	Q9P287
GO:0019240	BP	citrulline biosynthetic process	3	4	6.18338e-07	P27708/P31327/P54886
GO:0019255	BP	glucose 1-phosphate metabolic process	1	2	0.0107401	Q16851
GO:0019264	BP	glycine biosynthetic process from serine	1	3	0.0160669	P34897
GO:0019346	BP	transsulfuration	1	4	0.021365	P11586
GO:0019538	BP	protein metabolic process	1	4	0.021365	O95816
GO:0019724	BP	B cell mediated immunity	1	4	0.021365	P43246
GO:0019827	BP	stem cell population maintenance	3	57	0.00366019	P26196/Q14683/Q9UQE7
GO:0019843	MF	rRNA binding	10	61	1.32437e-12	P30050/P32969/P46781/P62280/P62701/P62750/P62913/P62917/Q92979/Q9NR30
GO:0019886	BP	antigen processing and presentation of exogenous peptide antigen via MHC class II	10	106	3.76921e-10	O95782/P50570/P55735/P61163/P63010/P84077/Q00610/Q14203/Q14204/Q9BXS5
GO:0019897	CC	extrinsic component of plasma membrane	2	27	0.00929122	P07355/Q96EY1
GO:0019899	MF	enzyme binding	20	289	2.65249e-16	P00533/P09874/P0DMV9/P11021/P11142/P15880/P16615/P23396/P26368/P27708/P35232/P43246/P50570/P59998/P62318/P63244/Q15366/Q92769/Q9H4A6/Q9Y383
GO:0019900	MF	kinase binding	4	57	0.000261812	P08237/P17858/P21333/P23396
GO:0019901	MF	protein kinase binding	21	291	2.03229e-17	O95573/O95782/P04792/P06748/P09874/P13639/P23396/P40763/P43246/P46459/P62140/P62753/P68104/Q00610/Q12931/Q13151/Q13177/Q13418/Q15717/Q96EY1/Q9P258
GO:0019903	MF	protein phosphatase binding	4	50	0.000157248	O00203/P00533/P40763/P63244
GO:0019904	MF	protein domain specific binding	7	105	1.81913e-06	O95573/P11021/P26196/P35579/P52272/P62805/Q9P258
GO:0019908	CC	nuclear cyclin-dependent protein kinase holoenzyme complex	1	4	0.021365	Q9P287
GO:0021510	BP	spinal cord development	2	32	0.0128992	O43175/O75530
GO:0021539	BP	subthalamus development	1	1	0.00538451	O14949
GO:0021548	BP	pons development	1	1	0.00538451	O14949
GO:0021589	BP	cerebellum structural organization	1	3	0.0160669	P11021
GO:0021680	BP	cerebellar Purkinje cell layer development	2	13	0.00217006	O14949/P11021
GO:0021691	BP	cerebellar Purkinje cell layer maturation	1	4	0.021365	P48444
GO:0021782	BP	glial cell development	1	4	0.021365	O43175
GO:0021794	BP	thalamus development	2	15	0.00290048	O14949/Q02218
GO:0021860	BP	pyramidal neuron development	2	8	0.000793022	O14949/Q02218
GO:0022605	BP	mammalian oogenesis stage	1	2	0.0107401	P62753
GO:0022618	BP	ribonucleoprotein complex assembly	1	2	0.0107401	P63173
GO:0022624	CC	proteasome accessory complex	13	21	5.375e-25	O00232/O00487/O43242/P17980/P35998/P43686/P62191/P62195/P62333/Q13200/Q15008/Q16401/Q9UNM6
GO:0022625	CC	cytosolic large ribosomal subunit	38	69	5.1515e-68	P05387/P05388/P18077/P18124/P18621/P26373/P27635/P30050/P32969/P35268/P36578/P39023/P40429/P42766/P46776/P46777/P46778/P46779/P49207/P50914/P61254/P61313/P61353/P61513/P62424/P62750/P62829/P62888/P62899/P62906/P62910/P62913/P62917/P63173/P83731/P84098/Q02878/Q9Y3U8
GO:0022627	CC	cytosolic small ribosomal subunit	18	51	2.5436e-28	P15880/P23396/P46781/P46783/P60866/P61247/P62081/P62241/P62249/P62263/P62266/P62277/P62280/P62701/P62753/P62847/P62861/Q71UM5
GO:0022857	MF	transmembrane transporter activity	7	108	2.19782e-06	O75964/P06576/P24539/P25705/P36542/P48047/P61619
GO:0023026	MF	MHC class II protein complex binding	2	17	0.00373015	P11142/P14618
GO:0030017	CC	sarcomere	2	40	0.0197204	P84077/Q13418
GO:0030018	CC	Z disc	4	133	0.00599402	O75369/P04792/P05787/Q86TC9
GO:0030027	CC	lamellipodium	5	179	0.00298565	O60716/P50570/Q13418/Q16513/Q7L576
GO:0030032	BP	lamellipodium assembly	2	38	0.0178993	Q7L576/Q9H4A6
GO:0030049	BP	muscle filament sliding	2	38	0.0178993	P08670/P60660
GO:0030122	CC	AP-2 adaptor complex	2	9	0.00101596	O95782/P63010
GO:0030126	CC	COPI vesicle coat	6	29	1.01231e-08	O14579/P35606/P48444/P53618/P53621/Q9Y678
GO:0030130	CC	clathrin coat of trans-Golgi network vesicle	2	20	0.00515593	O95782/Q00610
GO:0030133	CC	transport vesicle	9	112	1.19332e-08	O14579/O15260/P35606/P48444/P53618/P53621/Q12904/Q9H0U4/Q9Y678
GO:0030139	CC	endocytic vesicle	3	59	0.0040345	P00533/P33176/Q5VYK3
GO:0030159	MF	receptor signaling complex scaffold activity	2	18	0.00418152	Q96T76/Q9UN86
GO:0030176	CC	integral component of endoplasmic reticulum membrane	4	148	0.00867294	P11021/P61619/Q9NZ01/Q9P2E9
GO:0030177	BP	positive regulation of Wnt signaling pathway	2	36	0.0161542	P51532/P68400
GO:0030218	BP	erythrocyte differentiation	4	48	0.000133993	P38646/P55265/P62263/Q9H9B4
GO:0030220	BP	platelet formation	2	19	0.00465687	P35579/Q06124
GO:0030234	MF	enzyme regulator activity	3	36	0.000970952	O43242/Q13200/Q15019
GO:0030261	BP	chromosome condensation	2	11	0.00154112	O95831/P06493
GO:0030264	BP	nuclear fragmentation involved in apoptotic nuclear change	1	2	0.0107401	Q13148
GO:0030292	MF	protein tyrosine kinase inhibitor activity	1	3	0.0160669	P63244
GO:0030307	BP	positive regulation of cell growth	4	92	0.00159708	O00571/P00533/P16401/P68400
GO:0030308	BP	negative regulation of cell growth	4	133	0.00599402	O00571/P35232/P51532/P63244
GO:0030331	MF	estrogen receptor binding	4	28	1.53531e-05	P17844/Q92841/Q96T76/Q99623
GO:0030332	MF	cyclin binding	2	18	0.00418152	P06493/P24941
GO:0030334	BP	regulation of cell migration	4	124	0.00468723	O15031/P02545/P21333/Q9P258
GO:0030335	BP	positive regulation of cell migration	7	234	0.000307196	O00159/O60610/O95163/P00533/P11021/P63244/Q13418
GO:0030425	CC	dendrite	9	389	0.000300638	O43390/P05388/P38919/P46779/P51610/P62753/P63244/Q14980/Q9UBB4
GO:0030433	BP	ubiquitin-dependent ERAD pathway	10	73	8.61392e-12	P11021/P17980/P35998/P43686/P62191/P62195/P62333/Q5VYK3/Q8TCJ2/Q96A33
GO:0030478	CC	actin cap	1	4	0.021365	P61160
GO:0030490	BP	maturation of SSU-rRNA	2	14	0.00252272	P55769/P62263
GO:0030496	CC	midbody	11	132	1.91069e-10	O60716/P06493/P07355/P11021/P50570/P62826/P63244/Q15019/Q16181/Q16513/Q9P258
GO:0030506	MF	ankyrin binding	2	23	0.00679276	Q01082/Q15149
GO:0030520	BP	intracellular estrogen receptor signaling pathway	2	25	0.00799771	Q15424/Q96PK6
GO:0030521	BP	androgen receptor signaling pathway	3	41	0.00142103	P31689/P62826/Q9Y2W1
GO:0030532	CC	small nuclear ribonucleoprotein complex	6	19	6.05213e-10	P09661/P14678/P62306/P62314/P62318/Q15393
GO:0030544	MF	Hsp70 protein binding	3	22	0.000221471	P23396/P25685/P31689
GO:0030619	MF	U1 snRNA binding	3	6	3.06693e-06	P08621/P09012/Q6P2Q9
GO:0030620	MF	U2 snRNA binding	4	7	2.87091e-08	P09661/P14678/P62318/Q6P2Q9
GO:0030621	MF	U4 snRNA binding	2	5	0.000286277	P55769/Q13838
GO:0030622	MF	U4atac snRNA binding	1	2	0.0107401	P55769
GO:0030623	MF	U5 snRNA binding	1	3	0.0160669	Q6P2Q9
GO:0030628	MF	pre-mRNA 3'-splice site binding	2	6	0.000427882	P26368/Q01081
GO:0030666	CC	endocytic vesicle membrane	3	78	0.00875826	O95782/P50570/P63010
GO:0030669	CC	clathrin-coated endocytic vesicle membrane	4	53	0.000197408	O95782/P63010/Q00610/Q9BXS5
GO:0030674	MF	protein binding, bridging	6	59	8.37518e-07	P15924/P62333/Q92878/Q96D46/Q96PK6/Q96T76
GO:0030683	BP	evasion or tolerance by virus of host immune response	1	1	0.00538451	P19525
GO:0030686	CC	90S preribosome	2	10	0.00126543	O76021/P62081
GO:0030687	CC	preribosome, large subunit precursor	5	34	1.0858e-06	O00541/P05387/P05388/Q99848/Q9UKD2
GO:0030690	CC	Noc1p-Noc2p complex	1	1	0.00538451	Q9Y3T9
GO:0030691	CC	Noc2p-Noc3p complex	1	1	0.00538451	Q9Y3T9
GO:0030695	MF	GTPase regulator activity	2	27	0.00929122	O95373/Q96EY1
GO:0030705	BP	cytoskeleton-dependent intracellular transport	4	18	2.39463e-06	P07437/P33176/P68363/Q9BQE3
GO:0030742	MF	GTP-dependent protein binding	2	15	0.00290048	O00203/O00429
GO:0030893	CC	meiotic cohesin complex	2	5	0.000286277	Q14683/Q9UQE7
GO:0030898	MF	actin-dependent ATPase activity	3	14	5.40532e-05	O00159/P35579/P60660
GO:0030942	MF	endoplasmic reticulum signal peptide binding	2	8	0.000793022	P37108/Q9UHB9
GO:0030947	BP	regulation of vascular endothelial growth factor receptor signaling pathway	1	4	0.021365	Q9NZM1
GO:0030951	BP	establishment or maintenance of microtubule cytoskeleton polarity	1	3	0.0160669	P02545
GO:0030957	MF	Tat protein binding	3	9	1.27267e-05	P06748/P31689/P51532
GO:0030984	MF	kininogen binding	1	1	0.00538451	Q07021
GO:0031000	BP	response to caffeine	2	13	0.00217006	P27708/Q92769
GO:0031012	CC	extracellular matrix	57	305	2.20179e-69	O75369/P02545/P04792/P04843/P05141/P06576/P07437/P08670/P11021/P11142/P12236/P13639/P14618/P15924/P17844/P18077/P18085/P21333/P23246/P23396/P25705/P30050/P32969/P35268/P35579/P38646/P40227/P46783/P48047/P52272/P60660/P60842/P60866/P61247/P61353/P61978/P62081/P62249/P62263/P62277/P62280/P62701/P62805/P62826/P62829/P62888/P62913/P68371/P78527/Q00610/Q00839/Q01813/Q07065/Q13418/Q14204/Q15029/Q15149
GO:0031047	BP	gene silencing by RNA	12	95	1.90652e-13	O75694/P12270/P35658/P49792/P52948/P57740/P62805/P62826/Q7KZF4/Q8TEM1/Q9HAV4/Q9NRG9
GO:0031053	BP	primary miRNA processing	2	9	0.00101596	P22626/Q9BXP5
GO:0031072	MF	heat shock protein binding	4	26	1.13063e-05	P0DMV9/P11142/P12270/P29692
GO:0031080	CC	nuclear pore outer ring	3	9	1.27267e-05	P52948/P55735/P57740
GO:0031100	BP	animal organ regeneration	4	58	0.000280015	P06493/P27708/P46013/P60891
GO:0031105	CC	septin complex	3	29	0.000510981	Q15019/Q16181/Q9UHD8
GO:0031118	BP	rRNA pseudouridine synthesis	1	4	0.021365	O60832
GO:0031120	BP	snRNA pseudouridine synthesis	1	3	0.0160669	O60832
GO:0031124	BP	mRNA 3'-end processing	13	50	8.13537e-19	O43809/P26368/P38919/P84103/Q01081/Q01130/Q07955/Q13247/Q13838/Q15287/Q86V81/Q86W42/Q9BY77
GO:0031145	BP	anaphase-promoting complex-dependent catabolic process	17	85	4.70598e-22	O00232/O00487/O43242/O43684/P06493/P17980/P25789/P28070/P35998/P43686/P62191/P62195/P62333/Q13200/Q15008/Q16401/Q9UNM6
GO:0031175	BP	neuron projection development	4	139	0.00698774	O43175/P27816/Q15019/Q9UBB4
GO:0031252	CC	cell leading edge	4	39	5.8851e-05	P08670/P35579/P84077/Q14203
GO:0031267	MF	small GTPase binding	2	13	0.00217006	P21333/Q9P258
GO:0031295	BP	T cell costimulation	3	97	0.0157524	P41240/Q06124/Q13177
GO:0031340	BP	positive regulation of vesicle fusion	2	11	0.00154112	P07355/P33176
GO:0031365	BP	N-terminal protein amino acid modification	1	4	0.021365	P50579
GO:0031369	MF	translation initiation factor binding	5	15	1.27505e-08	O00303/O00571/P62847/Q6PKG0/Q99613
GO:0031397	BP	negative regulation of protein ubiquitination	3	50	0.00252088	P0DMV9/P23396/P31689
GO:0031398	BP	positive regulation of protein ubiquitination	3	66	0.00552376	P11021/Q13155/Q96EY1
GO:0031453	BP	positive regulation of heterochromatin assembly	1	1	0.00538451	P12270
GO:0031490	MF	chromatin DNA binding	5	62	2.23049e-05	P10412/P16401/P16403/P40763/Q9Y230
GO:0031491	MF	nucleosome binding	2	9	0.00101596	Q5SSJ5/Q9Y3T9
GO:0031523	CC	Myb complex	1	3	0.0160669	P21333
GO:0031531	MF	thyrotropin-releasing hormone receptor binding	1	1	0.00538451	P62195
GO:0031571	BP	mitotic G1 DNA damage checkpoint	2	13	0.00217006	P24941/Q71UM5
GO:0031595	CC	nuclear proteasome complex	7	8	1.00315e-15	O00232/P17980/P35998/P43686/P62191/P62195/P62333
GO:0031597	CC	cytosolic proteasome complex	7	13	2.10223e-13	O00487/P17980/P35998/P43686/P62191/P62195/P62333
GO:0031625	MF	ubiquitin protein ligase binding	16	259	1.45965e-12	O00429/P00533/P05141/P07437/P0DMV9/P11021/P11142/P13010/P17987/P31689/P38646/P42704/P68363/Q13619/Q15366/Q9UQ80
GO:0031690	MF	adrenergic receptor binding	1	1	0.00538451	Q07021
GO:0031860	BP	telomeric 3' overhang formation	1	4	0.021365	Q92878
GO:0031871	MF	proteinase activated receptor binding	2	3	8.65001e-05	P35232/Q8WUM4
GO:0031929	BP	TOR signaling	2	20	0.00515593	P62753/Q6PKG0
GO:0031965	CC	nuclear membrane	18	326	3.93394e-13	O14980/O75694/P00533/P02545/P12270/P20700/P42167/P49792/P52948/P57740/P67809/Q5JTH9/Q8TEM1/Q92973/Q9NRG9/Q9NUU7/Q9NZM1/Q9UKD2
GO:0031982	CC	vesicle	6	122	5.64532e-05	P07355/P14618/P33176/P60660/Q09666/Q9BQE3
GO:0031990	BP	mRNA export from nucleus in response to heat stress	1	2	0.0107401	P12270
GO:0032008	BP	positive regulation of TOR signaling	2	33	0.0136829	P55735/Q9H4A6
GO:0032040	CC	small-subunit processome	3	51	0.00266782	P55769/P62081/Q92979
GO:0032042	BP	mitochondrial DNA metabolic process	2	5	0.000286277	P09874/P36776
GO:0032051	MF	clathrin light chain binding	1	2	0.0107401	Q00610
GO:0032071	BP	regulation of endodeoxyribonuclease activity	1	2	0.0107401	P06748
GO:0032079	BP	positive regulation of endodeoxyribonuclease activity	1	3	0.0160669	P23396
GO:0032137	MF	guanine/thymine mispair binding	2	4	0.000172382	P43246/P52701
GO:0032154	CC	cleavage furrow	4	45	0.000103919	P35579/Q15019/Q16181/Q16513
GO:0032200	BP	telomere organization	1	4	0.021365	P62805
GO:0032201	BP	telomere maintenance via semi-conservative replication	1	1	0.00538451	Q92900
GO:0032206	BP	positive regulation of telomere maintenance	2	11	0.00154112	Q92878/Q9BVP2
GO:0032211	BP	negative regulation of telomere maintenance via telomerase	4	12	3.97432e-07	P07910/P09651/Q00839/Q9H0A0
GO:0032212	BP	positive regulation of telomere maintenance via telomerase	8	41	5.47152e-11	O60832/P09651/P17987/P40227/P48643/P49368/P50991/Q99832
GO:0032298	BP	positive regulation of DNA-dependent DNA replication initiation	1	3	0.0160669	P24941
GO:0032301	CC	MutSalpha complex	2	6	0.000427882	P43246/P52701
GO:0032302	CC	MutSbeta complex	1	2	0.0107401	P43246
GO:0032357	MF	oxidized purine DNA binding	1	2	0.0107401	P23396
GO:0032358	MF	oxidized pyrimidine DNA binding	1	1	0.00538451	P23396
GO:0032402	BP	melanosome transport	2	29	0.0106713	P62820/Q14203
GO:0032437	CC	cuticular plate	1	4	0.021365	Q01082
GO:0032438	BP	melanosome organization	2	20	0.00515593	O00203/Q9BXS5
GO:0032459	BP	regulation of protein oligomerization	1	1	0.00538451	O00429
GO:0032470	BP	positive regulation of endoplasmic reticulum calcium ion concentration	1	2	0.0107401	P16615
GO:0032480	BP	negative regulation of type I interferon production	2	31	0.0121358	Q14258/Q15366
GO:0032481	BP	positive regulation of type I interferon production	6	55	5.48754e-07	P12956/P13010/P78527/Q08211/Q7Z2W4/Q8N884
GO:0032496	BP	response to lipopolysaccharide	4	196	0.0220799	P10620/P31327/Q13151/Q92769
GO:0032508	BP	DNA duplex unwinding	2	14	0.00252272	Q92499/Q92878
GO:0032528	BP	microvillus organization	1	2	0.0107401	Q06124
GO:0032557	MF	pyrimidine ribonucleotide binding	1	1	0.00538451	Q16851
GO:0032587	CC	ruffle membrane	8	81	1.52555e-08	O00159/O60610/P18085/P23396/P50570/P68104/Q12792/Q9Y490
GO:0032728	BP	positive regulation of interferon-beta production	2	26	0.00863352	O00571/Q7Z2W4
GO:0032786	BP	positive regulation of DNA-templated transcription, elongation	3	13	4.26411e-05	Q13838/Q86V81/Q9Y5B9
GO:0032796	BP	uropod organization	1	4	0.021365	P35579
GO:0032804	BP	negative regulation of low-density lipoprotein particle receptor catabolic process	1	2	0.0107401	P07355
GO:0032876	BP	negative regulation of DNA endoreduplication	2	5	0.000286277	Q14683/Q9UQE7
GO:0032880	BP	regulation of protein localization	3	56	0.00348133	O76021/P63244/Q15019
GO:0032922	BP	circadian regulation of gene expression	6	85	7.22329e-06	P11387/P62140/Q00839/Q06210/Q92769/Q9BQG0
GO:0032981	BP	mitochondrial respiratory chain complex I assembly	4	62	0.000361979	O95831/P28331/Q16718/Q16795
GO:0033077	BP	T cell differentiation in thymus	3	34	0.000820269	P62753/P78527/Q96EY1
GO:0033120	BP	positive regulation of RNA splicing	2	12	0.00184276	P26368/Q07955
GO:0033148	BP	positive regulation of intracellular estrogen receptor signaling pathway	3	12	3.29328e-05	P09874/P17844/Q92841
GO:0033206	BP	meiotic cytokinesis	1	3	0.0160669	P61160
GO:0033209	BP	tumor necrosis factor-mediated signaling pathway	17	120	2.35522e-19	O00232/O00487/O43242/P05783/P05787/P17980/P25789/P28070/P35998/P43686/P62191/P62195/P62333/Q13200/Q15008/Q16401/Q9UNM6
GO:0033218	MF	amide binding	1	3	0.0160669	Q99623
GO:0033277	BP	abortive mitotic cell cycle	1	2	0.0107401	Q06124
GO:0033290	CC	eukaryotic 48S preinitiation complex	6	56	6.11813e-07	O00303/O15371/P05198/Q13347/Q14152/Q99613
GO:0033291	CC	eukaryotic 80S initiation complex	1	2	0.0107401	P63173
GO:0033292	BP	T-tubule organization	1	4	0.021365	P16615
GO:0033313	BP	meiotic cell cycle checkpoint	1	1	0.00538451	Q08J23
GO:0033572	BP	transferrin transport	2	40	0.0197204	P50570/Q00610
GO:0033590	BP	response to cobalamin	1	4	0.021365	P00533
GO:0033592	MF	RNA strand annealing activity	1	4	0.021365	P23588
GO:0033594	BP	response to hydroxyisoflavone	1	2	0.0107401	P00533
GO:0033597	CC	mitotic checkpoint complex	1	1	0.00538451	O43684
GO:0033613	MF	activating transcription factor binding	2	19	0.00465687	O75475/P29692
GO:0033674	BP	positive regulation of kinase activity	2	14	0.00252272	Q92616/Q92878
GO:0033677	MF	DNA/RNA helicase activity	1	1	0.00538451	Q92499
GO:0033683	BP	nucleotide-excision repair, DNA incision	2	38	0.0178993	P09874/Q13619
GO:0033962	BP	cytoplasmic mRNA processing body assembly	2	13	0.00217006	P26196/Q14204
GO:0034046	MF	poly(G) binding	2	7	0.000596896	Q00839/Q8TCS8
GO:0034057	MF	RNA strand-exchange activity	1	2	0.0107401	P23588
GO:0034063	BP	stress granule assembly	2	11	0.00154112	O00571/Q14204
GO:0034080	BP	CENP-A containing nucleosome assembly	3	33	0.000750884	P06748/P62805/Q9Y265
GO:0034198	BP	cellular response to amino acid starvation	3	30	0.000565493	P05198/P19525/Q92616
GO:0034329	BP	cell junction assembly	2	12	0.00184276	P21333/Q13418
GO:0034332	BP	adherens junction organization	3	40	0.00132231	O60716/P15924/P41240
GO:0034341	BP	response to interferon-gamma	2	27	0.00929122	P61619/Q96EY1
GO:0034379	BP	very-low-density lipoprotein particle assembly	2	9	0.00101596	O95573/P84077
GO:0034398	BP	telomere tethering at nuclear periphery	1	1	0.00538451	P52948
GO:0034399	CC	nuclear periphery	6	21	1.19942e-09	O75475/P12270/P52948/P57740/Q92973/Q99848
GO:0034418	BP	urate biosynthetic process	1	2	0.0107401	P60891
GO:0034463	BP	90S preribosome assembly	1	2	0.0107401	P63173
GO:0034504	BP	protein localization to nucleus	3	32	0.000685352	O14980/P02545/P62913
GO:0034506	CC	chromosome, centromeric core domain	1	1	0.00538451	Q9P258
GO:0034511	MF	U3 snoRNA binding	2	5	0.000286277	P55769/Q2NL82
GO:0034512	MF	box C/D snoRNA binding	1	1	0.00538451	P55769
GO:0034513	MF	box H/ACA snoRNA binding	1	4	0.021365	O60832
GO:0034515	CC	proteasome storage granule	1	2	0.0107401	Q13200
GO:0034599	BP	cellular response to oxidative stress	6	104	2.29916e-05	P09874/P0DMV9/P16615/P32322/P36776/Q8TCS8
GO:0034602	MF	oxoglutarate dehydrogenase (NAD+) activity	1	1	0.00538451	Q02218
GO:0034604	MF	pyruvate dehydrogenase (NAD+) activity	1	2	0.0107401	P08559
GO:0034605	BP	cellular response to heat	6	49	2.72036e-07	P05198/P0DMV9/P12270/P46013/Q92769/Q9NZM1
GO:0034644	BP	cellular response to UV	3	47	0.00211053	P05198/Q9Y230/Q9Y3T9
GO:0034663	CC	endoplasmic reticulum chaperone complex	2	15	0.00290048	P11021/Q9Y4L1
GO:0034693	CC	U11/U12 snRNP	1	1	0.00538451	O75533
GO:0034709	CC	methylosome	4	15	1.08198e-06	P14678/P62306/P62314/P62318
GO:0034715	CC	pICln-Sm protein complex	3	9	1.27267e-05	P62306/P62314/P62318
GO:0034719	CC	SMN-Sm protein complex	5	16	1.84638e-08	P14678/P62306/P62314/P62318/Q8TEQ6
GO:0034976	BP	response to endoplasmic reticulum stress	5	78	6.78013e-05	P05198/P13639/P16615/Q13148/Q9Y4L1
GO:0034988	MF	Fc-gamma receptor I complex binding	1	2	0.0107401	P21333
GO:0035061	CC	interchromatin granule	2	6	0.000427882	Q01130/Q13148
GO:0035098	CC	ESC/E(Z) complex	2	12	0.00184276	O75530/Q92769
GO:0035145	CC	exon-exon junction complex	2	15	0.00290048	P38919/Q92900
GO:0035173	MF	histone kinase activity	1	3	0.0160669	P06493
GO:0035198	MF	miRNA binding	2	17	0.00373015	P22626/Q8TCS8
GO:0035267	CC	NuA4 histone acetyltransferase complex	2	28	0.00997054	Q9Y230/Q9Y265
GO:0035281	BP	pre-miRNA export from nucleus	2	2	2.89369e-05	P62826/Q9HAV4
GO:0035327	CC	transcriptionally active chromatin	2	20	0.00515593	O75475/P16403
GO:0035437	BP	maintenance of protein localization in endoplasmic reticulum	1	1	0.00538451	P11021
GO:0035455	BP	response to interferon-alpha	2	11	0.00154112	P19525/P55265
GO:0035613	MF	RNA stem-loop binding	3	10	1.81081e-05	O00571/P07814/P38919
GO:0035614	MF	snRNA stem-loop binding	1	2	0.0107401	P09012
GO:0035617	BP	stress granule disassembly	1	3	0.0160669	P33176
GO:0035690	BP	cellular response to drug	4	79	0.000907252	P00533/P11172/P27708/Q15029
GO:0035770	CC	ribonucleoprotein granule	3	10	1.81081e-05	P14866/P51991/Q7L2E3
GO:0035861	CC	site of double-strand break	2	29	0.0106713	Q92878/Q9UMS4
GO:0035904	BP	aorta development	2	22	0.00622415	P50570/P63010
GO:0035927	BP	RNA import into mitochondrion	1	1	0.00538451	Q8TCS8
GO:0035928	BP	rRNA import into mitochondrion	1	3	0.0160669	Q8TCS8
GO:0035999	BP	tetrahydrofolate interconversion	2	32	0.0128992	P11586/P34897
GO:0036002	MF	pre-mRNA binding	3	11	2.47989e-05	P17844/Q01130/Q13247
GO:0036020	CC	endolysosome membrane	3	12	3.29328e-05	O95782/P63010/Q00610
GO:0036211	BP	protein modification process	1	1	0.00538451	P09874
GO:0036228	BP	protein localization to nuclear inner membrane	1	2	0.0107401	O75694
GO:0036402	MF	proteasome-activating ATPase activity	6	6	2.36715e-14	P17980/P35998/P43686/P62191/P62195/P62333
GO:0036464	CC	cytoplasmic ribonucleoprotein granule	9	24	4.31769e-15	P05388/P07437/P19338/P46779/P62701/P62753/Q00839/Q02878/Q08211
GO:0036498	BP	IRE1-mediated unfolded protein response	8	57	8.77507e-10	P02545/P11021/P61619/Q06210/Q14203/Q9Y490/Q9Y4L1/Q9Y5M8
GO:0036499	BP	PERK-mediated unfolded protein response	2	13	0.00217006	P05198/P11021
GO:0038061	BP	NIK/NF-kappaB signaling	15	64	9.47072e-21	O00232/O00487/O43242/P17980/P25789/P28070/P35998/P43686/P62191/P62195/P62333/Q13200/Q15008/Q16401/Q9UNM6
GO:0038089	BP	positive regulation of cell migration by vascular endothelial growth factor signaling pathway	1	1	0.00538451	O00159
GO:0038095	BP	Fc-epsilon receptor signaling pathway	16	206	4.28759e-14	O00232/O00487/O43242/P17980/P25789/P28070/P35998/P43686/P62191/P62195/P62333/Q13177/Q13200/Q15008/Q16401/Q9UNM6
GO:0038096	BP	Fc-gamma receptor signaling pathway involved in phagocytosis	4	154	0.00993202	O00159/P59998/P61160/Q7L576
GO:0038127	BP	ERBB signaling pathway	1	4	0.021365	Q06124
GO:0039507	BP	suppression by virus of host molecular function	1	1	0.00538451	Q7Z2W4
GO:0039534	BP	negative regulation of MDA-5 signaling pathway	1	3	0.0160669	Q07021
GO:0039694	BP	viral RNA genome replication	2	9	0.00101596	Q15365/Q15366
GO:0040008	BP	regulation of growth	3	63	0.00485083	Q13177/Q9Y230/Q9Y265
GO:0040014	BP	regulation of multicellular organism growth	2	35	0.0153107	P40763/Q06124
GO:0042026	BP	protein refolding	3	19	0.000141038	O60884/P0DMV9/P11142
GO:0042059	BP	negative regulation of epidermal growth factor receptor signaling pathway	3	37	0.00105242	O95782/P00533/P63010
GO:0042134	MF	rRNA primary transcript binding	1	3	0.0160669	Q6NZI2
GO:0042149	BP	cellular response to glucose starvation	2	33	0.0136829	P11021/Q9BQG0
GO:0042162	MF	telomeric DNA binding	4	47	0.00012335	P12956/P13010/P19338/Q92900
GO:0042177	BP	negative regulation of protein catabolic process	4	34	3.38966e-05	P00533/P21333/P35232/Q15393
GO:0042220	BP	response to cocaine	3	41	0.00142103	P50570/Q15029/Q92769
GO:0042255	BP	ribosome assembly	3	6	3.06693e-06	P06748/Q2NL82/Q9BY44
GO:0042256	BP	mature ribosome assembly	2	16	0.00330305	O00571/Q07021
GO:0042267	BP	natural killer cell mediated cytotoxicity	2	18	0.00418152	P07437/P68371
GO:0042273	BP	ribosomal large subunit biogenesis	9	29	3.22925e-14	O00541/P18077/P18124/P46777/P50914/P61254/P62913/Q99848/Q9Y3T9
GO:0042274	BP	ribosomal small subunit biogenesis	6	18	4.15988e-10	P62081/P62249/P62753/P62847/Q92979/Q9H0A0
GO:0042288	MF	MHC class I protein binding	4	14	7.9685e-07	P06576/P07437/P25705/P68371
GO:0042327	BP	positive regulation of phosphorylation	2	23	0.00679276	P00533/Q13418
GO:0042382	CC	paraspeckles	5	6	2.65167e-11	O43809/P23246/P52272/Q15233/Q16630
GO:0042383	CC	sarcolemma	4	99	0.0020891	P05787/P07355/Q09666/Q15149
GO:0042393	MF	histone binding	7	86	4.68943e-07	P06748/P35659/P62805/Q15021/Q96P70/Q9BZK7/Q9Y3T9
GO:0042405	CC	nuclear inclusion body	3	12	3.29328e-05	P12270/P49792/P52948
GO:0042445	BP	hormone metabolic process	2	15	0.00290048	Q06124/Q15424
GO:0042470	CC	melanosome	10	112	6.50676e-10	P04843/P07355/P11021/P11142/P50991/P62820/P62826/Q00610/Q7KZF4/Q8WUM4
GO:0042493	BP	response to drug	15	387	4.63165e-09	O14980/O76094/P00966/P04844/P06493/P10620/P11387/P13010/P28288/P31327/P33993/P37108/P40763/Q92769/Q9UHB9
GO:0042555	CC	MCM complex	6	44	1.40488e-07	P25205/P33991/P33992/P33993/P49736/Q14566
GO:0042564	CC	NLS-dependent protein nuclear import complex	1	1	0.00538451	Q9BQG0
GO:0042565	CC	RNA nuclear export complex	2	2	2.89369e-05	P62826/Q9HAV4
GO:0042593	BP	glucose homeostasis	4	120	0.00417372	P08237/P40763/P62753/Q06124
GO:0042594	BP	response to starvation	2	42	0.0216156	P27708/P31327
GO:0042623	MF	ATPase activity, coupled	3	21	0.000192037	P0DMV9/P11142/P46459
GO:0042645	CC	mitochondrial nucleoid	12	48	3.05382e-17	O76031/P05141/P06576/P31327/P34897/P36776/P38646/P42704/Q7L0Y3/Q7L2E3/Q96AG4/Q96EY1
GO:0042752	BP	regulation of circadian rhythm	4	57	0.000261812	P23246/P62140/P78527/Q15233
GO:0042769	BP	DNA damage response, detection of DNA damage	4	37	4.76597e-05	P09874/P23396/P31689/Q13619
GO:0042771	BP	intrinsic apoptotic signaling pathway in response to DNA damage by p53 class mediator	2	35	0.0153107	P43246/Q71UM5
GO:0042776	BP	mitochondrial ATP synthesis coupled proton transport	6	20	8.6065e-10	O75964/P06576/P24539/P25705/P36542/P48047
GO:0042788	CC	polysomal ribosome	3	7	5.34559e-06	P13639/P62424/Q8NE71
GO:0042802	MF	identical protein binding	22	317	8.00982e-18	O00429/P00533/P04792/P07910/P08237/P08670/P17858/P19338/P22234/P27708/P32322/P38159/P41240/P54886/Q13148/Q13838/Q15165/Q15645/Q16851/Q6DD88/Q9UMS4/Q9Y230
GO:0042803	MF	protein homodimerization activity	20	572	7.81802e-11	O00429/O43809/P06748/P11908/P12270/P18124/P21333/P26639/P28288/P35579/P43246/P60891/P63244/Q02809/Q12904/Q15717/Q8WUM4/Q9HB71/Q9P289/Q9Y2Z4
GO:0042826	MF	histone deacetylase binding	7	73	1.51034e-07	O43809/P0DMV9/P16401/P23246/P35232/P52292/Q16513
GO:0042995	CC	cell projection	6	80	5.07701e-06	P27708/P50991/P59998/P61160/P61978/P78347
GO:0042998	BP	positive regulation of Golgi to plasma membrane protein transport	2	5	0.000286277	O95573/P63244
GO:0043000	BP	Golgi to plasma membrane CFTR protein transport	1	1	0.00538451	P05783
GO:0043001	BP	Golgi to plasma membrane protein transport	3	32	0.000685352	P46459/Q01082/Q9H4A6
GO:0043005	CC	neuron projection	7	265	0.000643662	P08670/P27816/P51991/P84077/Q7L576/Q96HC4/Q9HB71
GO:0043006	BP	activation of phospholipase A2 activity by calcium-mediated signaling	1	2	0.0107401	P00533
GO:0043008	MF	ATP-dependent protein binding	1	3	0.0160669	Q13838
GO:0043021	MF	ribonucleoprotein complex binding	4	39	5.8851e-05	O00541/O94906/P38919/Q00839
GO:0043022	MF	ribosome binding	9	89	1.54002e-09	P04844/P05198/P11021/P13639/P61619/P62495/Q8NE71/Q92616/Q9BY44
GO:0043023	MF	ribosomal large subunit binding	2	9	0.00101596	P06748/Q96D46
GO:0043024	MF	ribosomal small subunit binding	4	13	5.71618e-07	O00571/P06748/P23588/P61221
GO:0043025	CC	neuronal cell body	9	376	0.000234562	P21333/P27708/P38919/P51610/P63244/P78347/Q13418/Q14980/Q9UBB4
GO:0043033	CC	isoamylase complex	1	1	0.00538451	P35573
GO:0043034	CC	costamere	4	22	5.62742e-06	P05787/Q09666/Q13418/Q15149
GO:0043044	BP	ATP-dependent chromatin remodeling	6	66	1.63593e-06	O94776/P07910/P51532/Q14839/Q92769/Q92922
GO:0043047	MF	single-stranded telomeric DNA binding	2	18	0.00418152	P22626/Q92878
GO:0043065	BP	positive regulation of apoptotic process	11	431	2.75525e-05	O00429/O00571/O95831/P31689/P50570/P62753/P63244/P78527/Q07021/Q15287/Q96EY1
GO:0043066	BP	negative regulation of apoptotic process	26	606	9.77279e-16	O00571/P00533/P04792/P05783/P06493/P06748/P11021/P18085/P18583/P19525/P21333/P31689/P38646/P40763/P55265/P61247/P61978/P62753/P78527/Q13177/Q86W42/Q92769/Q96EY1/Q99623/Q9H4A6/Q9UQ80
GO:0043069	BP	negative regulation of programmed cell death	2	15	0.00290048	P62195/Q96EY1
GO:0043086	BP	negative regulation of catalytic activity	2	23	0.00679276	O43390/Q86VP6
GO:0043123	BP	positive regulation of I-kappaB kinase/NF-kappaB signaling	4	195	0.0217188	P21333/P29692/Q14258/Q7Z2W4
GO:0043141	MF	ATP-dependent 5'-3' DNA helicase activity	2	17	0.00373015	Q9Y230/Q9Y265
GO:0043154	BP	negative regulation of cysteine-type endopeptidase activity involved in apoptotic process	3	70	0.00650409	O00571/P68400/Q96EY1
GO:0043161	BP	proteasome-mediated ubiquitin-dependent protein catabolic process	20	223	1.67587e-18	O00232/O00487/O43242/O43684/P06493/P17980/P25789/P28070/P35998/P43686/P62191/P62195/P62333/Q13200/Q13619/Q15008/Q15366/Q16401/Q9BZK7/Q9UNM6
GO:0043198	CC	dendritic shaft	3	43	0.00163206	P21333/P46459/Q13418
GO:0043209	CC	myelin sheath	26	211	2.9066e-27	O43175/P05141/P06576/P08559/P10515/P11021/P11142/P14618/P17987/P22695/P24539/P25705/P28331/P35232/P36542/P38646/P46459/P48643/P49368/P61163/P68363/P68371/Q00325/Q15019/Q16891/Q8WUM4
GO:0043231	CC	intracellular membrane-bounded organelle	25	973	2.31404e-10	O00429/O14980/P25205/P25789/P26196/P28288/P35658/P35998/P48444/P52701/P53618/P55735/P63010/P67809/Q00610/Q13813/Q15365/Q86V81/Q96EY1/Q9BQG0/Q9BY77/Q9H4A6/Q9NZM1/Q9Y265/Q9Y2W2
GO:0043248	BP	proteasome assembly	2	35	0.0153107	Q5VYK3/Q9UNM6
GO:0043254	BP	regulation of protein complex assembly	3	13	4.26411e-05	P11142/P51610/Q06124
GO:0043273	MF	CTPase activity	1	1	0.00538451	O00571
GO:0043330	BP	response to exogenous dsRNA	2	42	0.0216156	Q92499/Q9NR30
GO:0043406	BP	positive regulation of MAP kinase activity	3	64	0.00506929	P00533/P41240/Q13418
GO:0043433	BP	negative regulation of DNA-binding transcription factor activity	3	68	0.00600193	P21333/Q92769/Q99623
GO:0043484	BP	regulation of RNA splicing	3	46	0.00198369	P08621/P31943/Q09666
GO:0043488	BP	regulation of mRNA stability	23	105	2.33881e-30	O00232/O00487/O14980/O43242/P04792/P11142/P17980/P25789/P28070/P35658/P35998/P43686/P62191/P62195/P62333/Q04637/Q13200/Q15008/Q15717/Q16401/Q8NC51/Q92973/Q9UNM6
GO:0043531	MF	ADP binding	4	32	2.65084e-05	P35579/P36776/P60891/Q9UHD1
GO:0043538	BP	regulation of actin phosphorylation	1	1	0.00538451	Q12792
GO:0043564	CC	Ku70:Ku80 complex	2	12	0.00184276	P12956/P13010
GO:0043570	BP	maintenance of DNA repeat elements	1	4	0.021365	P43246
GO:0043614	CC	multi-eIF complex	2	2	2.89369e-05	P05198/Q14152
GO:0043686	BP	co-translational protein modification	2	2	2.89369e-05	P46977/Q8TCJ2
GO:0043687	BP	post-translational protein modification	2	23	0.00679276	P46977/Q8TCJ2
GO:0043967	BP	histone H4 acetylation	2	40	0.0197204	Q9Y230/Q9Y265
GO:0043968	BP	histone H2A acetylation	2	25	0.00799771	Q9Y230/Q9Y265
GO:0044053	BP	translocation of peptides or proteins into host cell cytoplasm	1	1	0.00538451	P17987
GO:0044183	MF	protein binding involved in protein folding	3	11	2.47989e-05	P0DMV9/P40227/P49368
GO:0044205	BP	'de novo' UMP biosynthetic process	2	9	0.00101596	P11172/P27708
GO:0044207	CC	translation initiation ternary complex	1	2	0.0107401	P05198
GO:0044212	MF	transcription regulatory region DNA binding	8	352	0.000722187	O94776/P12956/P13010/P14866/P23246/P35232/P40763/Q9BZK7
GO:0044297	CC	cell body	9	81	6.56612e-10	P07437/P17987/P46779/P48643/P49368/P50991/P62753/Q99832/Q9HB71
GO:0044387	BP	negative regulation of protein kinase activity by regulation of protein phosphorylation	2	8	0.000793022	P06748/P55265
GO:0044390	MF	ubiquitin-like protein conjugating enzyme binding	1	4	0.021365	P23396
GO:0044530	CC	supraspliceosomal complex	3	3	1.55208e-07	P38159/P55265/Q92900
GO:0044548	MF	S100 protein binding	3	13	4.26411e-05	P07355/P16615/Q09666
GO:0044611	CC	nuclear pore inner ring	1	3	0.0160669	O75694
GO:0044614	CC	nuclear pore cytoplasmic filaments	2	5	0.000286277	P49792/P52948
GO:0044615	CC	nuclear pore nuclear basket	3	6	3.06693e-06	P12270/P49792/P52948
GO:0044877	MF	protein-containing complex binding	2	8	0.000793022	P12956/P13010
GO:0045025	CC	mitochondrial degradosome	1	2	0.0107401	Q8TCS8
GO:0045026	BP	plasma membrane fusion	1	4	0.021365	P46459
GO:0045047	BP	protein targeting to ER	3	7	5.34559e-06	P37108/P61619/Q9UHB9
GO:0045069	BP	regulation of viral genome replication	1	4	0.021365	P17844
GO:0045070	BP	positive regulation of viral genome replication	4	27	1.32161e-05	O00571/P55265/Q16513/Q6PKG0
GO:0045071	BP	negative regulation of viral genome replication	4	46	0.000113333	P19525/P55265/Q12906/Q7Z2W4
GO:0045087	BP	innate immune response	10	561	0.00106753	O00571/O95373/P19525/P41240/P55265/Q07021/Q14258/Q15366/Q7Z2W4/Q8N884
GO:0045109	BP	intermediate filament organization	2	16	0.00330305	P08670/P15924
GO:0045111	CC	intermediate filament cytoskeleton	3	94	0.0144907	P08670/Q15149/Q16513
GO:0045120	CC	pronucleus	2	8	0.000793022	O75530/P14866
GO:0045121	CC	membrane raft	6	230	0.00165402	O00159/P00533/P13639/P41240/P50454/Q6NZI2
GO:0045128	BP	negative regulation of reciprocal meiotic recombination	1	1	0.00538451	P43246
GO:0045160	CC	myosin I complex	1	1	0.00538451	O00159
GO:0045182	MF	translation regulator activity	3	6	3.06693e-06	O00425/P46781/P62263
GO:0045184	BP	establishment of protein localization	2	40	0.0197204	P21333/Q9P258
GO:0045190	BP	isotype switching	2	17	0.00373015	P43246/P52701
GO:0045197	BP	establishment or maintenance of epithelial cell apical/basal polarity	2	13	0.00217006	P18085/Q13418
GO:0045254	CC	pyruvate dehydrogenase complex	2	14	0.00252272	P08559/P10515
GO:0045333	BP	cellular respiration	2	19	0.00465687	P28331/Q969Z0
GO:0045429	BP	positive regulation of nitric oxide biosynthetic process	3	55	0.00330792	P00533/P00966/P50570
GO:0045471	BP	response to ethanol	6	137	0.000107256	O00487/P06493/P13639/P24534/P40763/P62906
GO:0045716	BP	positive regulation of low-density lipoprotein particle receptor biosynthetic process	1	4	0.021365	P61978
GO:0045727	BP	positive regulation of translation	9	57	2.53839e-11	O00571/P06748/P13639/P38919/P62701/Q13838/Q15717/Q8NE71/Q9BY77
GO:0045732	BP	positive regulation of protein catabolic process	3	62	0.00463816	P46459/P68400/Q8NF37
GO:0045738	BP	negative regulation of DNA repair	1	1	0.00538451	P23396
GO:0045739	BP	positive regulation of DNA repair	2	41	0.0206588	P00533/P23396
GO:0045740	BP	positive regulation of DNA replication	4	50	0.000157248	P00533/P06493/P06748/Q9HB71
GO:0045814	BP	negative regulation of gene expression, epigenetic	2	24	0.00738404	O75530/P62805
GO:0045815	BP	positive regulation of gene expression, epigenetic	6	49	2.72036e-07	O00159/O75533/P35659/P62805/Q9BQG0/Q9NR30
GO:0045876	BP	positive regulation of sister chromatid cohesion	1	1	0.00538451	P23246
GO:0045892	BP	negative regulation of transcription, DNA-templated	15	655	3.75539e-06	O75530/P11142/P12956/P13010/P23246/P35232/P51532/P62195/Q07666/Q12906/Q15233/Q92769/Q99623/Q9BQG0/Q9UQ80
GO:0045893	BP	positive regulation of transcription, DNA-templated	18	619	1.2025e-08	P06748/P12956/P24941/P35232/P40763/P50570/P51532/P62195/P62826/Q12905/Q12906/Q13418/Q92769/Q92922/Q96T76/Q99729/Q9BZK7/Q9Y2W1
GO:0045899	BP	positive regulation of RNA polymerase II transcriptional preinitiation complex assembly	7	10	1.49078e-14	P17980/P35998/P43686/P62191/P62195/P62333/Q86VP6
GO:0045903	BP	positive regulation of translational fidelity	1	3	0.0160669	P46781
GO:0045910	BP	negative regulation of DNA recombination	2	5	0.000286277	P43246/P52701
GO:0045917	BP	positive regulation of complement activation	1	1	0.00538451	P35232
GO:0045931	BP	positive regulation of mitotic cell cycle	3	28	0.000459955	P06493/Q06124/Q16513
GO:0045944	BP	positive regulation of transcription by RNA polymerase II	27	1014	1.98372e-11	O00571/O60684/O75475/O94776/O94906/P00533/P09874/P12956/P17844/P18085/P19338/P38159/P40763/P51532/P61978/P67809/P78527/Q15365/Q15424/Q92769/Q92841/Q92922/Q96PK6/Q9BZK7/Q9Y224/Q9Y230/Q9Y2W1
GO:0045948	BP	positive regulation of translational initiation	2	15	0.00290048	O00571/Q07666
GO:0046034	BP	ATP metabolic process	3	52	0.00281993	P0DMV9/P11142/P28331
GO:0046084	BP	adenine biosynthetic process	1	1	0.00538451	P22234
GO:0046101	BP	hypoxanthine biosynthetic process	1	2	0.0107401	P60891
GO:0046134	BP	pyrimidine nucleoside biosynthetic process	2	6	0.000427882	P11172/P27708
GO:0046209	BP	nitric oxide metabolic process	1	4	0.021365	P31327
GO:0046487	BP	glyoxylate metabolic process	3	26	0.000367975	P08559/P10515/Q02218
GO:0046540	CC	U4/U6 x U5 tri-snRNP complex	3	31	0.000623585	O94906/P14678/P55769
GO:0046596	BP	regulation of viral entry into host cell	1	4	0.021365	Q14258
GO:0046655	BP	folic acid metabolic process	2	19	0.00465687	P11586/P34897
GO:0046676	BP	negative regulation of insulin secretion	2	36	0.0161542	P17858/Q06124
GO:0046732	BP	active induction of host immune response by virus	1	2	0.0107401	P12236
GO:0046777	BP	protein autophosphorylation	6	199	0.000789097	P00533/P05198/P19525/P27708/Q13177/Q9P289
GO:0046784	BP	viral mRNA export from host cell nucleus	3	8	8.51864e-06	Q13838/Q86V81/Q86W42
GO:0046825	BP	regulation of protein export from nucleus	3	7	5.34559e-06	O14980/Q06124/Q9HAV4
GO:0046831	BP	regulation of RNA export from nucleus	1	2	0.0107401	Q07666
GO:0046832	BP	negative regulation of RNA export from nucleus	1	2	0.0107401	P12270
GO:0046833	BP	positive regulation of RNA export from nucleus	1	2	0.0107401	Q07666
GO:0046933	MF	proton-transporting ATP synthase activity, rotational mechanism	4	41	7.18449e-05	P06576/P25705/P36542/P48047
GO:0046947	BP	hydroxylysine biosynthetic process	1	1	0.00538451	Q02809
GO:0046961	MF	proton-transporting ATPase activity, rotational mechanism	3	59	0.0040345	P06576/P25705/P36542
GO:0046982	MF	protein heterodimerization activity	5	231	0.0086385	P00533/P06748/Q14683/Q9NTJ3/Q9UQE7
GO:0047144	MF	2-acylglycerol-3-phosphate O-acyltransferase activity	2	9	0.00101596	Q8NF37/Q96N66
GO:0047159	MF	1-alkenylglycerophosphocholine O-acyltransferase activity	1	1	0.00538451	Q8NF37
GO:0047191	MF	1-alkylglycerophosphocholine O-acyltransferase activity	1	1	0.00538451	Q8NF37
GO:0047192	MF	1-alkylglycerophosphocholine O-acetyltransferase activity	1	3	0.0160669	Q8NF37
GO:0047485	MF	protein N-terminus binding	7	70	1.12679e-07	P09874/P51532/P68400/Q92922/Q99623/Q9BZK7/Q9UQ35
GO:0047496	BP	vesicle transport along microtubule	2	16	0.00330305	P33176/P62820
GO:0048013	BP	ephrin receptor signaling pathway	5	95	0.000172647	O95782/P59998/P61160/P63010/Q06124
GO:0048024	BP	regulation of mRNA splicing, via spliceosome	2	9	0.00101596	P18583/P84103
GO:0048025	BP	negative regulation of mRNA splicing, via spliceosome	7	23	2.86675e-11	P22626/P26368/P38159/P61978/Q07021/Q13247/Q15287
GO:0048026	BP	positive regulation of mRNA splicing, via spliceosome	5	18	3.58968e-08	P08621/P11142/P38159/Q9UMS4/Q9Y2W1
GO:0048027	MF	mRNA 5'-UTR binding	4	10	1.70057e-07	O00425/O00571/P62263/Q6PKG0
GO:0048146	BP	positive regulation of fibroblast proliferation	3	59	0.0040345	P00533/P07355/P78527
GO:0048208	BP	COPII vesicle coating	4	81	0.000996157	P46459/P55735/P62820/Q9H0U4
GO:0048211	BP	Golgi vesicle docking	1	2	0.0107401	P46459
GO:0048255	BP	mRNA stabilization	2	19	0.00465687	Q15717/Q9Y2W1
GO:0048365	MF	Rac GTPase binding	3	26	0.000367975	P21333/Q7L576/Q9P258
GO:0048471	CC	perinuclear region of cytoplasm	32	676	2.56926e-20	O00429/O95573/O95831/P00533/P02545/P05783/P07355/P0DMV9/P16615/P19525/P21333/P25205/P31689/P33176/P42704/P50570/P62753/P63244/P84077/Q07065/Q12792/Q13177/Q15019/Q16513/Q27J81/Q7L576/Q8NC51/Q9NZN4/Q9P289/Q9UBB4/Q9UHD8/Q9Y224
GO:0048487	MF	beta-tubulin binding	2	26	0.00863352	P42704/P48643
GO:0048511	BP	rhythmic process	6	52	3.90672e-07	P17844/P23246/P63244/P68400/P78527/Q08211
GO:0048660	BP	regulation of smooth muscle cell proliferation	3	9	1.27267e-05	P12956/P13010/P78527
GO:0048678	BP	response to axon injury	2	42	0.0216156	P06493/P18085
GO:0048709	BP	oligodendrocyte differentiation	2	34	0.0144869	P41240/Q07955
GO:0048812	BP	neuron projection morphogenesis	3	67	0.00575987	P00533/P50570/Q13418
GO:0050115	MF	myosin-light-chain-phosphatase activity	1	1	0.00538451	P62140
GO:0050658	BP	RNA transport	2	7	0.000596896	P22626/Q9Y224
GO:0050681	MF	androgen receptor binding	4	39	5.8851e-05	O94906/P17844/P51532/P62826
GO:0050687	BP	negative regulation of defense response to virus	2	9	0.00101596	Q07021/Q15366
GO:0050690	BP	regulation of defense response to virus by virus	5	28	3.93859e-07	O95782/P63010/P84077/Q13177/Q9BXS5
GO:0050714	BP	positive regulation of protein secretion	3	40	0.00132231	O00429/P84077/Q9H4A6
GO:0050765	BP	negative regulation of phagocytosis	2	12	0.00184276	P41240/P63244
GO:0050769	BP	positive regulation of neurogenesis	2	25	0.00799771	P13010/Q9BXP5
GO:0050821	BP	protein stabilization	13	151	2.80494e-12	P0DMV9/P16401/P17987/P21333/P35232/P40227/P48643/P49368/P50991/P51610/Q96EY1/Q99623/Q99832
GO:0050847	BP	progesterone receptor signaling pathway	1	4	0.021365	P35232
GO:0050852	BP	T cell receptor signaling pathway	17	192	7.72057e-16	O00232/O00487/O43242/P17980/P25789/P28070/P35998/P41240/P43686/P62191/P62195/P62333/Q13177/Q13200/Q15008/Q16401/Q9UNM6
GO:0050999	BP	regulation of nitric-oxide synthase activity	2	33	0.0136829	P00533/P50570
GO:0051012	BP	microtubule sliding	1	2	0.0107401	P27816
GO:0051015	MF	actin filament binding	4	89	0.00141336	P00533/P21333/P35579/Q7L576
GO:0051020	MF	GTPase binding	6	19	6.05213e-10	P07814/P21333/P41252/P67809/Q01082/Q12904
GO:0051028	BP	mRNA transport	9	56	2.1478e-11	O00159/O00425/O14980/P09651/P42704/P51991/P55735/Q9UIA9/Q9UN86
GO:0051059	MF	NF-kappaB binding	3	28	0.000459955	P06748/Q92769/Q96EY1
GO:0051082	MF	unfolded protein binding	14	78	1.07869e-17	O60884/P06748/P0DMV9/P11021/P11142/P17987/P25685/P38646/P40227/P49368/P50991/P68371/Q99832/Q9Y230
GO:0051085	BP	chaperone cofactor-dependent protein refolding	2	14	0.00252272	P11142/P25685
GO:0051087	MF	chaperone binding	6	60	9.2635e-07	O60884/O95433/P11021/P25685/P31689/Q9Y4L1
GO:0051092	BP	positive regulation of NF-kappaB transcription factor activity	4	181	0.0170418	P06748/P0DMV9/P19525/Q14258
GO:0051096	BP	positive regulation of helicase activity	2	6	0.000427882	P43246/P52701
GO:0051154	BP	negative regulation of striated muscle cell differentiation	1	4	0.021365	P67809
GO:0051170	BP	import into nucleus	6	17	2.78595e-10	P09651/P14678/P62306/P62314/P62318/Q8TEQ6
GO:0051223	BP	regulation of protein transport	2	12	0.00184276	P31689/Q14C86
GO:0051225	BP	spindle assembly	3	86	0.0114166	P07437/P23396/Q14839
GO:0051246	BP	regulation of protein metabolic process	1	3	0.0160669	Q13619
GO:0051259	BP	protein complex oligomerization	5	60	1.89926e-05	O00429/P06748/P08237/P17858/Q09666
GO:0051260	BP	protein homooligomerization	5	286	0.0200042	P06748/P36776/P38159/Q6DD88/Q8TCS8
GO:0051262	BP	protein tetramerization	3	87	0.0117779	O43809/P34897/Q16630
GO:0051289	BP	protein homotetramerization	4	80	0.000950974	O00429/P12268/P17858/P34897
GO:0051290	BP	protein heterotetramerization	4	20	3.75923e-06	P07355/P12956/P62805/Q9Y285
GO:0051291	BP	protein heterooligomerization	3	80	0.00938442	Q13418/Q16181/Q9UHD8
GO:0051292	BP	nuclear pore complex assembly	2	10	0.00126543	P52948/P57740
GO:0051293	BP	establishment of spindle localization	1	1	0.00538451	Q14204
GO:0051301	BP	cell division	24	466	2.23859e-16	O43684/P06493/P07437/P12270/P23396/P24941/P27816/P62140/P62826/P68363/Q08J23/Q14683/Q14980/Q15019/Q15021/Q16513/Q29RF7/Q53GS9/Q9BQE3/Q9NTJ3/Q9P258/Q9UHD8/Q9UQE7/Q9Y265
GO:0051321	BP	meiotic cell cycle	2	44	0.023583	O43684/Q14980
GO:0051343	BP	positive regulation of cyclic-nucleotide phosphodiesterase activity	1	4	0.021365	P63244
GO:0051347	BP	positive regulation of transferase activity	1	1	0.00538451	P15880
GO:0051383	BP	kinetochore organization	1	4	0.021365	Q9NTJ3
GO:0051391	BP	tRNA acetylation	1	2	0.0107401	Q9H0A0
GO:0051414	BP	response to cortisol	1	4	0.021365	P27708
GO:0051463	BP	negative regulation of cortisol secretion	1	1	0.00538451	Q06124
GO:0051575	MF	5'-deoxyribose-5-phosphate lyase activity	1	4	0.021365	P12956
GO:0051599	BP	response to hydrostatic pressure	1	4	0.021365	P05787
GO:0051607	BP	defense response to virus	9	268	1.78001e-05	P19525/P55265/Q12904/Q12906/Q14258/Q15366/Q7Z2W4/Q8N884/Q9NUQ8
GO:0051693	BP	actin filament capping	2	17	0.00373015	Q01082/Q13813
GO:0051726	BP	regulation of cell cycle	7	212	0.000168635	O00541/P11142/P18583/P35658/P40763/P63244/Q13148
GO:0051879	MF	Hsp90 protein binding	3	21	0.000192037	P23396/P68400/Q9UHD1
GO:0051880	MF	G-quadruplex DNA binding	2	6	0.000427882	P36776/Q92878
GO:0051881	BP	regulation of mitochondrial membrane potential	2	34	0.0144869	P28331/P32322
GO:0051897	BP	positive regulation of protein kinase B signaling	3	93	0.0140833	P00533/Q07021/Q13418
GO:0051901	BP	positive regulation of mitochondrial depolarization	2	13	0.00217006	P09874/P63244
GO:0051959	MF	dynein light intermediate chain binding	1	3	0.0160669	Q14204
GO:0051973	BP	positive regulation of telomerase activity	3	29	0.000510981	O60832/P17987/P50991
GO:0051987	BP	positive regulation of attachment of spindle microtubules to kinetochore	1	3	0.0160669	Q9P258
GO:0055015	BP	ventricular cardiac muscle cell development	2	11	0.00154112	P02545/P06493
GO:0055081	BP	anion homeostasis	1	2	0.0107401	P31327
GO:0055085	BP	transmembrane transport	6	401	0.0224055	P05198/P20042/P28288/P41091/P61221/Q8NE71
GO:0055108	BP	Golgi to transport vesicle transport	1	2	0.0107401	P84077
GO:0055129	BP	L-proline biosynthetic process	2	16	0.00330305	P32322/P54886
GO:0055131	MF	C3HC4-type RING finger domain binding	3	6	3.06693e-06	P0DMV9/P11142/P31689
GO:0060020	BP	Bergmann glial cell differentiation	2	13	0.00217006	P08670/Q06124
GO:0060041	BP	retina development in camera-type eye	3	68	0.00600193	P12268/P83731/Q8NF37
GO:0060071	BP	Wnt signaling pathway, planar cell polarity pathway	18	92	4.37361e-23	O00232/O00487/O43242/O95782/P17980/P25789/P28070/P35998/P43686/P62191/P62195/P62333/P63010/Q00610/Q13200/Q15008/Q16401/Q9UNM6
GO:0060125	BP	negative regulation of growth hormone secretion	1	1	0.00538451	Q06124
GO:0060171	CC	stereocilium membrane	1	3	0.0160669	O00159
GO:0060352	BP	cell adhesion molecule production	1	2	0.0107401	Q9H4A6
GO:0060368	BP	regulation of Fc receptor mediated stimulatory signaling pathway	1	4	0.021365	P41240
GO:0060395	BP	SMAD protein signal transduction	3	71	0.00676426	P08670/P53999/Q96PK6
GO:0060416	BP	response to growth hormone	3	18	0.000119246	P00966/P31327/Q9HB71
GO:0060548	BP	negative regulation of cell death	3	59	0.0040345	P0DMV9/Q13247/Q9HB71
GO:0060571	BP	morphogenesis of an epithelial fold	1	4	0.021365	P00533
GO:0060698	MF	endoribonuclease inhibitor activity	1	2	0.0107401	P61221
GO:0060699	BP	regulation of endoribonuclease activity	1	1	0.00538451	P06748
GO:0060702	BP	negative regulation of endoribonuclease activity	1	2	0.0107401	P61221
GO:0060735	BP	regulation of eIF2 alpha phosphorylation by dsRNA	1	1	0.00538451	P06748
GO:0060766	BP	negative regulation of androgen receptor signaling pathway	2	12	0.00184276	P35232/P51532
GO:0060904	BP	regulation of protein folding in endoplasmic reticulum	1	1	0.00538451	P11021
GO:0060965	BP	negative regulation of gene silencing by miRNA	1	4	0.021365	Q15717
GO:0060968	BP	regulation of gene silencing	1	2	0.0107401	P24941
GO:0060976	BP	coronary vasculature development	2	29	0.0106713	P50570/P63010
GO:0060996	BP	dendritic spine development	2	16	0.00330305	P18085/Q13177
GO:0061014	BP	positive regulation of mRNA catabolic process	4	12	3.97432e-07	O43390/Q7Z2W4/Q8TCS8/Q92900
GO:0061029	BP	eyelid development in camera-type eye	2	15	0.00290048	P00533/Q92769
GO:0061034	BP	olfactory bulb mitral cell layer development	1	2	0.0107401	Q02218
GO:0061041	BP	regulation of wound healing	1	4	0.021365	Q13247
GO:0061077	BP	chaperone-mediated protein folding	3	38	0.00113808	P68400/Q12931/Q9UHD1
GO:0061101	BP	neuroendocrine cell differentiation	1	2	0.0107401	Q9P287
GO:0061198	BP	fungiform papilla formation	1	4	0.021365	Q92769
GO:0061481	BP	response to TNF agonist	1	1	0.00538451	P23396
GO:0061484	BP	hematopoietic stem cell homeostasis	2	6	0.000427882	P55265/Q14157
GO:0061501	MF	cyclic-GMP-AMP synthase activity	1	1	0.00538451	Q8N884
GO:0061574	CC	ASAP complex	1	3	0.0160669	Q15287
GO:0061582	BP	intestinal epithelial cell migration	1	1	0.00538451	Q06124
GO:0061621	BP	canonical glycolysis	4	26	1.13063e-05	P08237/P14618/P17858/Q01813
GO:0061673	CC	mitotic spindle astral microtubule	1	2	0.0107401	Q14980
GO:0061684	BP	chaperone-mediated autophagy	1	3	0.0160669	P11142
GO:0061740	BP	protein targeting to lysosome involved in chaperone-mediated autophagy	1	1	0.00538451	P11142
GO:0061741	BP	chaperone-mediated protein transport involved in chaperone-mediated autophagy	1	1	0.00538451	P11142
GO:0061752	MF	telomeric repeat-containing RNA binding	1	2	0.0107401	P09651
GO:0070034	MF	telomerase RNA binding	5	16	1.84638e-08	O60832/P07910/P14678/P62318/Q00839
GO:0070037	MF	rRNA (pseudouridine) methyltransferase activity	1	1	0.00538451	Q92979
GO:0070061	MF	fructose binding	2	5	0.000286277	P08237/P17858
GO:0070062	CC	extracellular exosome	198	2775	2.11654e-164	O00159/O00232/O00487/O00571/O15031/O43175/O43242/O43776/O60701/O60716/O60884/O75369/O75964/O95433/P00966/P04792/P05141/P05198/P05387/P05388/P05783/P05787/P06493/P06576/P07355/P07437/P07910/P08237/P08670/P08729/P09651/P10412/P11021/P11142/P11216/P11586/P11908/P12268/P13639/P14618/P14678/P14866/P14868/P15880/P15924/P16401/P17844/P17858/P17987/P18077/P18085/P18124/P19338/P21333/P22102/P22234/P22626/…
GO:0070095	MF	fructose-6-phosphate binding	1	3	0.0160669	P17858
GO:0070129	BP	regulation of mitochondrial translation	1	4	0.021365	P42704
GO:0070141	BP	response to UV-A	1	3	0.0160669	P00533
GO:0070142	BP	synaptic vesicle budding	1	2	0.0107401	P84077
GO:0070180	MF	large ribosomal subunit rRNA binding	5	7	9.23961e-11	P05387/P05388/P62829/P84098/Q9UKD2
GO:0070181	MF	small ribosomal subunit rRNA binding	3	8	8.51864e-06	P23396/P62263/P62277
GO:0070182	MF	DNA polymerase binding	2	11	0.00154112	P36776/P51532
GO:0070184	BP	mitochondrial tyrosyl-tRNA aminoacylation	1	1	0.00538451	Q9Y2Z4
GO:0070192	BP	chromosome organization involved in meiotic cell cycle	1	4	0.021365	Q92878
GO:0070207	BP	protein homotrimerization	3	24	0.000288755	P10620/Q8TCS8/Q9UBB4
GO:0070212	BP	protein poly-ADP-ribosylation	1	4	0.021365	P09874
GO:0070221	BP	sulfide oxidation, using sulfide:quinone oxidoreductase	1	4	0.021365	Q9UBX3
GO:0070266	BP	necroptotic process	2	18	0.00418152	O00429/Q96HS1
GO:0070301	BP	cellular response to hydrogen peroxide	4	65	0.000433772	O95831/P06493/P23396/Q92769
GO:0070335	MF	aspartate binding	1	1	0.00538451	P27708
GO:0070370	BP	cellular heat acclimation	1	3	0.0160669	P0DMV9
GO:0070373	BP	negative regulation of ERK1 and ERK2 cascade	3	78	0.00875826	P35232/P41240/Q14152
GO:0070374	BP	positive regulation of ERK1 and ERK2 cascade	4	194	0.0213613	P00533/P35232/Q06124/Q99623
GO:0070409	BP	carbamoyl phosphate biosynthetic process	1	1	0.00538451	P31327
GO:0070419	CC	nonhomologous end joining complex	3	8	8.51864e-06	P12956/P13010/P78527
GO:0070434	BP	positive regulation of nucleotide-binding oligomerization domain containing 2 signaling pathway	1	3	0.0160669	P0DMV9
GO:0070435	CC	Shc-EGFR complex	1	2	0.0107401	P00533
GO:0070475	BP	rRNA base methylation	2	9	0.00101596	P46087/Q92979
GO:0070527	BP	platelet aggregation	5	52	9.36373e-06	P04792/P21333/P35579/Q13418/Q9Y490
GO:0070536	BP	protein K63-linked deubiquitination	2	28	0.00997054	O00487/P34897
GO:0070584	BP	mitochondrion morphogenesis	2	24	0.00738404	O00429/Q8TCS8
GO:0070585	BP	protein localization to mitochondrion	2	7	0.000596896	O00429/P31689
GO:0070618	CC	Grb2-Sos complex	1	1	0.00538451	Q07666
GO:0070682	BP	proteasome regulatory particle assembly	1	3	0.0160669	Q16401
GO:0070840	MF	dynein complex binding	1	4	0.021365	P12270
GO:0070849	BP	response to epidermal growth factor	1	4	0.021365	P12270
GO:0070883	MF	pre-miRNA binding	1	3	0.0160669	Q9HAV4
GO:0070901	BP	mitochondrial tRNA methylation	1	4	0.021365	Q7L0Y3
GO:0070911	BP	global genome nucleotide-excision repair	2	32	0.0128992	P09874/Q13619
GO:0070932	BP	histone H3 deacetylation	2	12	0.00184276	P23246/Q92769
GO:0070934	BP	CRD-mediated mRNA stabilization	3	5	1.53964e-06	P67809/Q00839/Q08211
GO:0070935	BP	3'-UTR-mediated mRNA stabilization	4	17	1.87046e-06	P07910/Q13148/Q13151/Q15717
GO:0070937	CC	CRD-mediated mRNA stability complex	4	6	1.23567e-08	O75534/P67809/Q00839/Q08211
GO:0071004	CC	U2-type prespliceosome	7	18	3.80897e-12	O75533/O95232/P08621/P14678/P26368/Q15459/Q9Y383
GO:0071010	CC	prespliceosome	2	6	0.000427882	P62314/P62318
GO:0071011	CC	precatalytic spliceosome	6	25	3.84368e-09	P08621/P18583/P55769/P62314/P62318/Q13435
GO:0071013	CC	catalytic step 2 spliceosome	33	93	5.6359e-51	O43390/O75533/O75643/O94906/P07910/P09651/P09661/P14678/P17844/P22626/P31943/P38159/P38919/P42285/P51991/P52272/P61978/P62306/P62314/P62318/Q00839/Q01081/Q07955/Q12874/Q13435/Q15029/Q15393/Q15459/Q6P2Q9/Q86V81/Q9BUQ8/Q9UMS4/Q9UQ35
GO:0071042	BP	nuclear polyadenylation-dependent mRNA catabolic process	1	4	0.021365	Q8TCS8
GO:0071169	BP	establishment of protein localization to chromatin	2	7	0.000596896	P16401/Q9Y230
GO:0071173	BP	spindle assembly checkpoint	1	3	0.0160669	O43684
GO:0071174	BP	mitotic spindle checkpoint	1	2	0.0107401	P68400
GO:0071204	CC	histone pre-mRNA 3'end processing complex	2	7	0.000596896	P14678/P67809
GO:0071208	MF	histone pre-mRNA DCP binding	2	4	0.000172382	P14678/P62318
GO:0071209	MF	U7 snRNA binding	1	3	0.0160669	P62318
GO:0071242	BP	cellular response to ammonium ion	1	4	0.021365	P00966
GO:0071245	BP	cellular response to carbon monoxide	1	1	0.00538451	P50570
GO:0071320	BP	cellular response to cAMP	3	62	0.00463816	P00966/P05388/P31327
GO:0071339	CC	MLL1 complex	3	29	0.000510981	P51610/Q9Y230/Q9Y265
GO:0071346	BP	cellular response to interferon-gamma	3	59	0.0040345	P00966/P07814/P40429
GO:0071353	BP	cellular response to interleukin-4	6	32	1.90492e-08	P05388/P11021/P12268/P39023/P49736/P68363
GO:0071360	BP	cellular response to exogenous dsRNA	2	13	0.00217006	Q7Z2W4/Q8N884
GO:0071364	BP	cellular response to epidermal growth factor stimulus	4	39	5.8851e-05	P00533/P27708/P33993/P68104
GO:0071377	BP	cellular response to glucagon stimulus	2	39	0.0188005	P00966/P31327
GO:0071392	BP	cellular response to estradiol stimulus	3	39	0.00122802	O95831/P00533/Q9Y230
GO:0071400	BP	cellular response to oleic acid	2	4	0.000172382	P00966/P31327
GO:0071407	BP	cellular response to organic cyclic compound	3	71	0.00676426	P40763/P51610/Q13177
GO:0071418	BP	cellular response to amine stimulus	1	4	0.021365	P00966
GO:0071439	CC	clathrin complex	1	4	0.021365	Q00610
GO:0071449	BP	cellular response to lipid hydroperoxide	1	1	0.00538451	P10620
GO:0071456	BP	cellular response to hypoxia	3	109	0.0214002	P02545/Q5SSJ5/Q9Y4L1
GO:0071475	BP	cellular hyperosmotic salinity response	2	3	8.65001e-05	P12956/P13010
GO:0071480	BP	cellular response to gamma radiation	2	22	0.00622415	P12956/P13010
GO:0071481	BP	cellular response to X-ray	3	12	3.29328e-05	P12956/P13010/P50570
GO:0071526	BP	semaphorin-plexin signaling pathway	2	35	0.0153107	O15031/P21333
GO:0071528	BP	tRNA re-export from nucleus	1	1	0.00538451	O43592
GO:0071540	CC	eukaryotic translation initiation factor 3 complex, eIF3e	1	1	0.00538451	Q14152
GO:0071541	CC	eukaryotic translation initiation factor 3 complex, eIF3m	4	10	1.70057e-07	O00303/O15371/Q13347/Q14152
GO:0071549	BP	cellular response to dexamethasone stimulus	4	33	3.00365e-05	P00533/P00966/P62910/Q00839
GO:0071564	CC	npBAF complex	2	20	0.00515593	P51532/Q92922
GO:0071565	CC	nBAF complex	2	17	0.00373015	P51532/Q92922
GO:0071709	BP	membrane assembly	1	2	0.0107401	Q01082
GO:0071732	BP	cellular response to nitric oxide	3	17	9.97708e-05	O95831/P24941/P50570
GO:0071733	BP	transcriptional activation by promoter-enhancer looping	1	3	0.0160669	Q9Y230
GO:0071765	BP	nuclear inner membrane organization	1	1	0.00538451	Q13148
GO:0071806	BP	protein transmembrane transport	1	1	0.00538451	P62826
GO:0071817	CC	MMXD complex	2	7	0.000596896	P05141/Q96T76
GO:0071899	BP	negative regulation of estrogen receptor binding	1	3	0.0160669	Q9Y230
GO:0071920	CC	cleavage body	1	2	0.0107401	Q92499
GO:0071944	CC	cell periphery	3	39	0.00122802	P05783/Q99623/Q9P289
GO:0071987	MF	WD40-repeat domain binding	1	3	0.0160669	P40227
GO:0072318	BP	clathrin coat disassembly	1	4	0.021365	P11142
GO:0072332	BP	intrinsic apoptotic signaling pathway by p53 class mediator	2	27	0.00929122	P17844/Q9BQG0
GO:0072356	BP	chromosome passenger complex localization to kinetochore	1	1	0.00538451	Q9P258
GO:0072369	BP	regulation of lipid transport by positive regulation of transcription from RNA polymerase II promoter	1	2	0.0107401	P61978
GO:0072422	BP	signal transduction involved in DNA damage checkpoint	1	2	0.0107401	Q9UMS4
GO:0072431	BP	signal transduction involved in mitotic G1 DNA damage checkpoint	1	1	0.00538451	P78527
GO:0072545	MF	tyrosine binding	1	4	0.021365	Q9Y2Z4
GO:0072553	BP	terminal button organization	1	4	0.021365	Q14839
GO:0072562	CC	blood microparticle	4	149	0.0088751	P0DMV9/P11142/P62195/Q9BY44
GO:0072589	CC	box H/ACA scaRNP complex	1	4	0.021365	O60832
GO:0072669	CC	tRNA-splicing ligase complex	3	9	1.27267e-05	Q92499/Q9Y224/Q9Y3I0
GO:0072686	CC	mitotic spindle	6	40	7.77964e-08	O60610/P06493/P12270/P23396/P27816/Q14980
GO:0072715	BP	cellular response to selenite ion	1	2	0.0107401	P38919
GO:0075522	BP	IRES-dependent viral translational initiation	4	7	2.87091e-08	O00303/O15371/Q14152/Q15366
GO:0075525	BP	viral translational termination-reinitiation	2	5	0.000286277	O15371/Q14152
GO:0075713	BP	establishment of integrated proviral latency	3	8	8.51864e-06	O75475/P12956/P13010
GO:0075733	BP	intracellular transport of virus	11	51	3.88894e-15	O14980/O75694/P12270/P35658/P49792/P52292/P52948/P57740/P62826/Q8TEM1/Q9NRG9
GO:0080182	BP	histone H3-K4 trimethylation	2	17	0.00373015	P10412/P16403
GO:0086039	MF	calcium-transporting ATPase activity involved in regulation of cardiac muscle cell membrane potential	1	2	0.0107401	P16615
GO:0089701	CC	U2AF	2	14	0.00252272	P26368/Q01081
GO:0090084	BP	negative regulation of inclusion body assembly	2	10	0.00126543	P0DMV9/P25685
GO:0090090	BP	negative regulation of canonical Wnt signaling pathway	16	182	6.12998e-15	O00232/O00487/O43242/O60716/P17980/P25789/P28070/P35998/P43686/P62191/P62195/P62333/Q13200/Q15008/Q16401/Q9UNM6
GO:0090110	BP	cargo loading into COPII-coated vesicle	1	3	0.0160669	P62820
GO:0090149	BP	mitochondrial membrane fission	1	2	0.0107401	O00429
GO:0090164	BP	asymmetric Golgi ribbon formation	1	2	0.0107401	Q9H4A6
GO:0090263	BP	positive regulation of canonical Wnt signaling pathway	16	136	5.71964e-17	O00232/O00487/O43242/P17980/P25789/P28070/P35998/P43686/P62191/P62195/P62333/Q13200/Q13418/Q15008/Q16401/Q9UNM6
GO:0090316	BP	positive regulation of intracellular protein transport	2	25	0.00799771	P12270/P33176
GO:0090343	BP	positive regulation of cell aging	1	1	0.00538451	P02545
GO:0090534	CC	calcium ion-transporting ATPase complex	1	2	0.0107401	P16615
GO:0090575	CC	RNA polymerase II transcription factor complex	4	37	4.76597e-05	P23246/P40763/Q15233/Q99729
GO:0090646	BP	mitochondrial tRNA processing	1	4	0.021365	Q7L0Y3
GO:0090650	BP	cellular response to oxygen-glucose deprivation	1	4	0.021365	O95831
GO:0090661	CC	box H/ACA telomerase RNP complex	1	4	0.021365	O60832
GO:0090666	BP	scaRNA localization to Cajal body	2	4	0.000172382	P17987/P50991
GO:0090669	BP	telomerase RNA stabilization	1	1	0.00538451	O60832
GO:0093001	BP	glycolysis from storage polysaccharide through glucose-1-phosphate	1	1	0.00538451	P08237
GO:0097061	BP	dendritic spine organization	1	3	0.0160669	P84077
GO:0097100	MF	supercoiled DNA binding	2	6	0.000427882	O75475/P23396
GO:0097110	MF	scaffold protein binding	4	37	4.76597e-05	P05783/P05787/P08670/P15924
GO:0097157	MF	pre-mRNA intronic binding	3	8	8.51864e-06	P14866/P22626/Q6P2Q9
GO:0097165	CC	nuclear stress granule	1	2	0.0107401	Q08211
GO:0097177	MF	mitochondrial ribosome binding	1	2	0.0107401	Q07021
GO:0097191	BP	extrinsic apoptotic signaling pathway	2	43	0.0225904	P05783/P05787
GO:0097193	BP	intrinsic apoptotic signaling pathway	3	32	0.000685352	O00571/P52701/Q13619
GO:0097212	BP	lysosomal membrane organization	1	2	0.0107401	P84077
GO:0097222	BP	mitochondrial mRNA polyadenylation	1	1	0.00538451	Q8TCS8
GO:0097227	CC	sperm annulus	1	3	0.0160669	P26196
GO:0097255	CC	R2TP complex	2	5	0.000286277	Q9Y230/Q9Y265
GO:0097284	BP	hepatocyte apoptotic process	2	17	0.00373015	P05783/P05787
GO:0097298	BP	regulation of nucleus size	1	1	0.00538451	Q5SSJ5
GO:0097421	BP	liver regeneration	6	39	6.64291e-08	P00533/P62249/P62847/P62910/P84098/Q07955
GO:0097452	CC	GAIT complex	2	4	0.000172382	P07814/P40429
GO:0097489	CC	multivesicular body, internal vesicle lumen	1	1	0.00538451	P00533
GO:0097493	MF	structural molecule activity conferring elasticity	1	2	0.0107401	Q09666
GO:0097513	CC	myosin II filament	1	3	0.0160669	P35579
GO:0097526	CC	spliceosomal tri-snRNP complex	2	5	0.000286277	P62314/P62318
GO:0097680	BP	double-strand break repair via classical nonhomologous end joining	1	3	0.0160669	P12956
GO:0097681	BP	double-strand break repair via alternative nonhomologous end joining	1	3	0.0160669	P78527
GO:0098532	BP	histone H3-K27 trimethylation	2	8	0.000793022	P10412/P16403
GO:0098534	BP	centriole assembly	1	3	0.0160669	Q96PK6
GO:0098554	CC	cytoplasmic side of endoplasmic reticulum membrane	1	2	0.0107401	P31689
GO:0098574	CC	cytoplasmic side of lysosomal membrane	1	4	0.021365	P68104
GO:0098575	CC	lumenal side of lysosomal membrane	1	1	0.00538451	P11142
GO:0098641	MF	cadherin binding involved in cell-cell adhesion	65	277	3.68182e-86	O00571/O60716/O75369/O76021/O95433/P00533/P05783/P07355/P11021/P11142/P13639/P14618/P15880/P21333/P22234/P25685/P26196/P26641/P29692/P33176/P35579/P41091/P42166/P49207/P50914/P51610/P54136/P61313/P61978/P62424/P62750/P62820/P62826/P63244/P78344/P83731/Q00341/Q01082/Q01813/Q02878/Q04637/Q09666/Q12792/Q13177/Q13813/Q14258/Q14C86/Q15019/Q15149/Q15365/Q16181/Q16513/Q6PKG0/Q7KZF4/Q7Z2W4/Q86UP2/Q8NC51/…
GO:0098847	MF	sequence-specific single stranded DNA binding	1	3	0.0160669	Q15365
GO:0098909	BP	regulation of cardiac muscle cell action potential involved in regulation of contraction	1	4	0.021365	P16615
GO:0102007	MF	acyl-L-homoserine-lactone lactonohydrolase activity	1	3	0.0160669	Q15165
GO:1900026	BP	positive regulation of substrate adhesion-dependent cell spreading	3	34	0.000820269	P21333/P50570/Q07021
GO:1900034	BP	regulation of cellular response to heat	13	75	2.56889e-16	O75694/O95816/P0DMV9/P11142/P12270/P25685/P35658/P49792/P52948/P57740/Q8TEM1/Q9NRG9/Q9UHD1
GO:1900063	BP	regulation of peroxisome organization	1	3	0.0160669	O00429
GO:1900078	BP	positive regulation of cellular response to insulin stimulus	1	3	0.0160669	O00159
GO:1900087	BP	positive regulation of G1/S transition of mitotic cell cycle	2	23	0.00679276	O00571/Q13619
GO:1900102	BP	negative regulation of endoplasmic reticulum unfolded protein response	1	3	0.0160669	P63244
GO:1900126	BP	negative regulation of hyaluronan biosynthetic process	2	3	8.65001e-05	O95782/Q00610
GO:1900225	BP	regulation of NLRP3 inflammasome complex assembly	1	1	0.00538451	P19525
GO:1900363	BP	regulation of mRNA polyadenylation	1	1	0.00538451	P09012
GO:1900369	BP	negative regulation of RNA interference	1	1	0.00538451	P55265
GO:1900370	BP	positive regulation of RNA interference	1	1	0.00538451	Q9HAV4
GO:1900748	BP	positive regulation of vascular endothelial growth factor signaling pathway	1	3	0.0160669	O00159
GO:1901006	BP	ubiquinone-6 biosynthetic process	1	1	0.00538451	Q16795
GO:1901165	BP	positive regulation of trophoblast cell migration	1	3	0.0160669	Q07021
GO:1901194	BP	negative regulation of formation of translation preinitiation complex	1	1	0.00538451	P40429
GO:1901216	BP	positive regulation of neuron death	3	21	0.000192037	P05198/P09874/Q13155
GO:1901224	BP	positive regulation of NIK/NF-kappaB signaling	2	15	0.00290048	P19525/P23396
GO:1901532	BP	regulation of hematopoietic progenitor cell differentiation	1	2	0.0107401	P19525
GO:1901796	BP	regulation of signal transduction by p53 class mediator	9	125	3.12183e-08	O94776/P24941/P68400/Q08945/Q14839/Q92769/Q92878/Q9Y3T9/Q9Y5B9
GO:1901838	BP	positive regulation of transcription of nucleolar large rRNA by RNA polymerase I	2	6	0.000427882	P19338/P51532
GO:1901856	BP	negative regulation of cellular respiration	1	2	0.0107401	Q12931
GO:1901998	BP	toxin transport	8	34	1.0746e-11	P11021/P17987/P31689/P35606/P48643/P49368/P50991/Q99832
GO:1902033	BP	regulation of hematopoietic stem cell proliferation	1	2	0.0107401	P19525
GO:1902036	BP	regulation of hematopoietic stem cell differentiation	1	1	0.00538451	P19525
GO:1902165	BP	regulation of intrinsic apoptotic signaling pathway in response to DNA damage by p53 class mediator	1	2	0.0107401	P61978
GO:1902186	BP	regulation of viral release from host cell	1	3	0.0160669	Q14258
GO:1902275	BP	regulation of chromatin organization	1	1	0.00538451	P46013
GO:1902307	BP	positive regulation of sodium ion transmembrane transport	1	3	0.0160669	P84077
GO:1902510	BP	regulation of apoptotic DNA fragmentation	1	4	0.021365	O95831
GO:1902546	BP	positive regulation of DNA N-glycosylase activity	1	1	0.00538451	P23396
GO:1902570	BP	protein localization to nucleolus	1	2	0.0107401	P62826
GO:1902626	BP	assembly of large subunit precursor of preribosome	1	3	0.0160669	P83731
GO:1902661	BP	positive regulation of glucose mediated signaling pathway	1	3	0.0160669	P51532
GO:1902722	BP	positive regulation of prolactin secretion	1	3	0.0160669	P00533
GO:1902728	BP	positive regulation of growth factor dependent skeletal muscle satellite cell proliferation	1	2	0.0107401	P40763
GO:1902751	BP	positive regulation of cell cycle G2/M phase transition	1	1	0.00538451	P06748
GO:1902775	BP	mitochondrial large ribosomal subunit assembly	1	3	0.0160669	Q7L2E3
GO:1902824	BP	positive regulation of late endosome to lysosome transport	1	3	0.0160669	P84077
GO:1902856	BP	negative regulation of non-motile cilium assembly	1	2	0.0107401	P27816
GO:1902857	BP	positive regulation of non-motile cilium assembly	2	6	0.000427882	Q16181/Q9UHD8
GO:1902895	BP	positive regulation of pri-miRNA transcription by RNA polymerase II	3	24	0.000288755	P40763/P51532/Q9BVP2
GO:1902904	BP	negative regulation of supramolecular fiber organization	1	1	0.00538451	P11142
GO:1903020	BP	positive regulation of glycoprotein metabolic process	2	2	2.89369e-05	P62820/Q9H0U4
GO:1903038	BP	negative regulation of leukocyte cell-cell adhesion	1	2	0.0107401	P00966
GO:1903146	BP	regulation of autophagy of mitochondrion	6	33	2.31763e-08	O00429/P26368/P46779/Q01081/Q9Y265/Q9Y2W2
GO:1903205	BP	regulation of hydrogen peroxide-induced cell death	1	1	0.00538451	Q9P289
GO:1903208	BP	negative regulation of hydrogen peroxide-induced neuron death	1	4	0.021365	P63244
GO:1903233	BP	regulation of calcium ion-dependent exocytosis of neurotransmitter	1	3	0.0160669	P16615
GO:1903298	BP	negative regulation of hypoxia-induced intrinsic apoptotic signaling pathway	1	3	0.0160669	Q9Y4L1
GO:1903351	BP	cellular response to dopamine	2	8	0.000793022	P50570/Q92769
GO:1903376	BP	regulation of oxidative stress-induced neuron intrinsic apoptotic signaling pathway	1	2	0.0107401	P09874
GO:1903377	BP	negative regulation of oxidative stress-induced neuron intrinsic apoptotic signaling pathway	1	4	0.021365	Q15233
GO:1903382	BP	negative regulation of endoplasmic reticulum stress-induced neuron intrinsic apoptotic signaling pathway	1	3	0.0160669	Q9Y4L1
GO:1903408	BP	positive regulation of sodium:potassium-exchanging ATPase activity	1	1	0.00538451	P50570
GO:1903427	BP	negative regulation of reactive oxygen species biosynthetic process	1	4	0.021365	Q12931
GO:1903515	BP	calcium ion transport from cytosol to endoplasmic reticulum	1	1	0.00538451	P16615
GO:1903526	BP	negative regulation of membrane tubulation	1	2	0.0107401	P50570
GO:1903551	BP	regulation of extracellular exosome assembly	1	3	0.0160669	Q8WUM4
GO:1903553	BP	positive regulation of extracellular exosome assembly	1	4	0.021365	Q8WUM4
GO:1903561	CC	extracellular vesicle	5	50	7.70154e-06	P14618/P68371/Q00610/Q13813/Q8WUM4
GO:1903578	BP	regulation of ATP metabolic process	1	2	0.0107401	O00429
GO:1903608	BP	protein localization to cytoplasmic stress granule	4	7	2.87091e-08	O00571/P67809/Q08211/Q92499
GO:1903725	BP	regulation of phospholipid metabolic process	1	2	0.0107401	P84077
GO:1903748	BP	negative regulation of establishment of protein localization to mitochondrion	1	2	0.0107401	P31689
GO:1903751	BP	negative regulation of intrinsic apoptotic signaling pathway in response to hydrogen peroxide	1	4	0.021365	Q12931
GO:1903800	BP	positive regulation of production of miRNAs involved in gene silencing by miRNA	1	3	0.0160669	P00533
GO:1903891	BP	regulation of ATF6-mediated unfolded protein response	1	1	0.00538451	P11021
GO:1903894	BP	regulation of IRE1-mediated unfolded protein response	1	2	0.0107401	P11021
GO:1903897	BP	regulation of PERK-mediated unfolded protein response	1	1	0.00538451	P11021
GO:1903919	BP	negative regulation of actin filament severing	1	3	0.0160669	P35579
GO:1903923	BP	positive regulation of protein processing in phagocytic vesicle	1	3	0.0160669	P35579
GO:1903955	BP	positive regulation of protein targeting to mitochondrion	6	85	7.22329e-06	P26368/P46779/Q01081/Q7Z6Z7/Q9Y265/Q9Y2W2
GO:1904045	BP	cellular response to aldosterone	1	1	0.00538451	O95831
GO:1904401	BP	cellular response to Thyroid stimulating hormone	1	2	0.0107401	P05388
GO:1904430	BP	negative regulation of t-circle formation	1	3	0.0160669	P13010
GO:1904570	BP	negative regulation of selenocysteine incorporation	1	2	0.0107401	P38919
GO:1904574	BP	negative regulation of selenocysteine insertion sequence binding	1	2	0.0107401	P38919
GO:1904589	BP	regulation of protein import	1	1	0.00538451	P11142
GO:1904646	BP	cellular response to amyloid-beta	1	4	0.021365	P09874
GO:1904685	BP	positive regulation of metalloendopeptidase activity	1	1	0.00538451	P40763
GO:1904715	BP	negative regulation of chaperone-mediated autophagy	1	3	0.0160669	P08621
GO:1904762	BP	positive regulation of myofibroblast differentiation	1	2	0.0107401	P09874
GO:1904764	BP	chaperone-mediated autophagy translocation complex disassembly	1	1	0.00538451	P11142
GO:1904816	BP	positive regulation of protein localization to chromosome, telomeric region	1	3	0.0160669	Q9BVP2
GO:1904837	BP	beta-catenin-TCF complex assembly	3	30	0.000565493	P51532/P62805/Q9Y265
GO:1904851	BP	positive regulation of establishment of protein localization to telomere	6	9	1.96132e-12	O60832/P17987/P40227/P48643/P50991/Q99832
GO:1904871	BP	positive regulation of protein localization to Cajal body	6	8	6.5677e-13	P17987/P40227/P48643/P49368/P50991/Q99832
GO:1904874	BP	positive regulation of telomerase RNA localization to Cajal body	9	15	1.72529e-17	O60832/P17987/P40227/P48643/P49368/P50991/Q99832/Q9Y230/Q9Y265
GO:1905053	BP	positive regulation of base-excision repair	1	2	0.0107401	P23396
GO:1905098	BP	negative regulation of guanyl-nucleotide exchange factor activity	1	2	0.0107401	P05198
GO:1905152	BP	positive regulation of voltage-gated sodium channel activity	1	2	0.0107401	P33176
GO:1905259	BP	negative regulation of nitrosative stress-induced intrinsic apoptotic signaling pathway	1	2	0.0107401	P31689
GO:1990036	BP	calcium ion import into sarcoplasmic reticulum	1	2	0.0107401	P16615
GO:1990247	MF	N6-methyladenosine-containing RNA binding	2	7	0.000596896	P07910/P22626
GO:1990253	BP	cellular response to leucine starvation	1	3	0.0160669	Q92616
GO:1990298	CC	bub1-bub3 complex	1	1	0.00538451	O43684
GO:1990416	BP	cellular response to brain-derived neurotrophic factor stimulus	2	5	0.000286277	P13639/P38919
GO:1990428	BP	miRNA transport	1	1	0.00538451	P22626
GO:1990446	MF	U1 snRNP binding	4	7	2.87091e-08	P08621/P09012/P62314/P62318
GO:1990481	BP	mRNA pseudouridine synthesis	1	2	0.0107401	O60832
GO:1990498	CC	mitotic spindle microtubule	1	1	0.00538451	Q00610
GO:1990583	MF	phospholipase D activator activity	1	2	0.0107401	P84077
GO:1990630	CC	IRE1-RACK1-PP2A complex	1	2	0.0107401	P63244
GO:1990667	CC	PCSK9-AnxA2 complex	1	2	0.0107401	P07355
GO:1990723	CC	cytoplasmic periphery of the nuclear pore complex	1	3	0.0160669	P49792
GO:1990829	MF	C-rich single-stranded DNA binding	1	2	0.0107401	Q15366
GO:1990876	CC	cytoplasmic side of nuclear pore	1	1	0.00538451	P35658
GO:1990904	CC	ribonucleoprotein complex	1	3	0.0160669	Q15717
GO:1990928	BP	response to amino acid starvation	1	2	0.0107401	Q9BY44
GO:1990932	MF	5.8S rRNA binding	2	2	2.89369e-05	P62277/P84098
GO:1990966	BP	ATP generation from poly-ADP-D-ribose	1	4	0.021365	P09874
GO:2000109	BP	regulation of macrophage apoptotic process	1	1	0.00538451	P17987
GO:2000145	BP	regulation of cell motility	3	29	0.000510981	O60610/P00533/Q16513
GO:2000299	BP	negative regulation of Rho-dependent protein serine/threonine kinase activity	1	1	0.00538451	Q9UHD1
GO:2000373	BP	positive regulation of DNA topoisomerase (ATP-hydrolyzing) activity	1	4	0.021365	Q00839
GO:2000627	BP	positive regulation of miRNA catabolic process	1	2	0.0107401	Q8TCS8
GO:2000767	BP	positive regulation of cytoplasmic translation	1	2	0.0107401	P13639
GO:2000772	BP	regulation of cellular senescence	2	10	0.00126543	O76021/Q8TCS8
GO:2000779	BP	regulation of double-strand break repair	1	2	0.0107401	P35659
GO:2000819	BP	regulation of nucleotide-excision repair	1	2	0.0107401	Q13619
GO:2001014	BP	regulation of skeletal muscle cell differentiation	2	8	0.000793022	P17844/Q92841
GO:2001032	BP	regulation of double-strand break repair via nonhomologous end joining	1	2	0.0107401	P35659
GO:2001229	BP	negative regulation of response to gamma radiation	1	1	0.00538451	P78527
GO:2001243	BP	negative regulation of intrinsic apoptotic signaling pathway	2	23	0.00679276	O00571/Q9Y3T9
GO:2001244	BP	positive regulation of intrinsic apoptotic signaling pathway	2	32	0.0128992	O00429/P63244
GO:2001246	BP	negative regulation of phosphatidylcholine biosynthetic process	1	1	0.00538451	Q8NF37
GO:2001247	BP	positive regulation of phosphatidylcholine biosynthetic process	1	1	0.00538451	O95573
GO:2001271	BP	negative regulation of cysteine-type endopeptidase activity involved in execution phase of apoptosis	1	3	0.0160669	Q13177
GO:2001272	BP	positive regulation of cysteine-type endopeptidase activity involved in execution phase of apoptosis	1	1	0.00538451	P23396
