# Supplementary material for: Hsp90α forms condensate engaging client proteins with RG motif repeats
Source: Royal Society of Chemistry journal article supplement (doi:10.1039/d4sc00267a), 2024-01-01
Supplement: d4sc00267a3.xlsx [file d4sc00267a3.xlsx]

## Sheet: Table S3
uniprot	MOL
O00159	P-body
O00203	Stress granule
O00232
O00303	Stress granule
O00425	P-body,Stress granule
O00429
O00487
O00541	P-body,Nucleolus
O00571	Splicesome,Nuclear body,Stress granule,Paraspeckle,Nucleolus
O14579
O14949
O14980	Stress granule,Nucleolus
O15031
O15042	Splicesome,Nuclear speckle,Paraspeckle,Stress granule
O15260
O15371	Stress granule
O43175	Paraspeckle
O43242	Stress granule
O43390	Splicesome,P-body,IMP1 ribonucleoprotein granule,SMN complex,Paraspeckle,Stress granule,Nucleolus
O43592	Stress granule
O43684	Splicesome,Nuclear stress body,Nucleolus
O43776	Stress granule
O43809	Nucleolus,Paraspeckle,Stress granule
O60610	Stress granule
O60684	Stress granule
O60701
O60716	Stress granule
O60832	Nuclear body,Cajal body,Stress granule,Nucleolus
O60841	Stress granule,Nucleolus
O60884	Nucleolus
O75369	Paraspeckle,Stress granule
O75475
O75530
O75533	Splicesome,Nuclear stress body,Nuclear speckle,P-body,Stress granule
O75534	Stress granule
O75643	Splicesome,Nuclear body,Stress granule,Nucleolus
O75694	Nuclear body,Stress granule
O75964
O76021	Stress granule,Nucleolus
O76031
O76094	Stress granule,Nucleolus
O94776
O94906	Splicesome,Nuclear speckle,Cajal body,Stress granule
O95163	Stress granule,Nuclear stress body
O95232	Nuclear speckle,Stress granule
O95373	Stress granule,Nuclear stress body
O95433	Stress granule
O95573	Stress granule,Nucleolus
O95782	Stress granule
O95816	Splicesome,Stress granule
O95831	Stress granule
P00533	PML nuclear body
P00966
P02545	Nuclear speckle,Nuclear body,Stress granule,Paraspeckle,Nucleolus
P04792	Splicesome,P-body,Stress granule
P04843
P04844	Stress granule
P05141	P-body
P05198	Nuclear speckle,P-body,Nucleolus
P05387	Nucleolus
P05388	Nuclear body,IMP1 ribonucleoprotein granule
P05783
P05787	Stress granule
P06493	Stress granule,Nuclear stress body,Nucleolus
P06576	Paraspeckle,Nucleolus
P06748	Nuclear stress body,Cajal body,P-body,SMN complex,Nucleolus
P07355	Nucleolus
P07437	Nuclear body,Nucleolus
P07814	Stress granule
P07910	Splicesome,Nuclear stress body,P-body,Stress granule,Nucleolus
P08237
P08559
P08621	Splicesome,Nuclear speckle,Nuclear body,Stress granule,SMN complex,Paraspeckle,Nucleolus
P08670	Nuclear stress body,Nuclear body,Stress granule,Paraspeckle,Nucleolus
P08729
P09012	Splicesome,Nucleolus
P09651	Splicesome,Sam68 nuclear body,Nuclear stress body,IMP1 ribonucleoprotein granule,Nuclear body,Stress granule,Paraspeckle,Nucleolus
P09661	Splicesome,Nuclear stress body,Nuclear speckle,Nuclear body,SMN complex,Stress granule,Nucleolus
P09874	Nuclear speckle,Nucleolus
P0DMV9	Splicesome
P10412	Paraspeckle,Nucleolus
P10515
P10620	Stress granule
P11021	Paraspeckle,Nuclear body,Stress granule,Nucleolus
P11142	Splicesome,SMN complex,IMP1 ribonucleoprotein granule,Nucleolus
P11172
P11216	Stress granule
P11387	Nucleolus
P11498
P11586	Stress granule
P11908
P12081
P12236	P-body,Stress granule
P12268
P12270	Nuclear pore complex,Paraspeckle,Nucleolus
P12956	P-body,Nucleolus
P13010	Stress granule,P-body,Nucleolus
P13639	Paraspeckle,Stress granule,Nucleolus
P14618
P14678	Splicesome,SMN complex
P14866	Sam68 nuclear body,Nuclear stress body,Nuclear body,IMP1 ribonucleoprotein granule,Stress granule,Nucleolus
P14868	Stress granule
P15880	Nuclear body,Stress granule,Nucleolus
P15924	Paraspeckle,Stress granule
P16401	Nucleolus
P16403	Nucleolus
P16615	Stress granule
P17480	Nucleolus
P17844	Splicesome,SMN complex,Nucleolus
P17858	P-body
P17980	Nucleolus
P17987	Stress granule
P18077	Nucleolus
P18085
P18124	Nucleolus
P18583	Nuclear speckle,Nuclear body
P18621	Nucleolus
P19338	Cajal body,IMP1 ribonucleoprotein granule,Nucleolus
P19525	Nucleolus,P-body,Stress granule
P20042	Stress granule,Nucleolus
P20700	P-body,Nucleolus
P21333
P22102	Paraspeckle,Stress granule
P22234
P22626	Splicesome,Sam68 nuclear body,Nuclear stress body,IMP1 ribonucleoprotein granule,Nuclear body,Stress granule,SMN complex,Paraspeckle,Nucleolus
P22695
P23246	Nuclear stress body,Nuclear speckle,Nuclear body,SMN complex,Paraspeckle,Nucleolus
P23396	Stress granule,P-body,IMP1 ribonucleoprotein granule,Nucleolus
P23588	Paraspeckle,Stress granule
P24534	Paraspeckle,Nucleolus
P24539	Stress granule
P24666	Stress granule
P24941	Nucleolus
P25205	Stress granule,Paraspeckle,Nucleolus
P25685	Nucleolus
P25705	Paraspeckle,Stress granule
P25789	P-body,Nucleolus
P26196	P-body,Stress granule
P26368	Splicesome,Nuclear speckle,Nuclear body,Stress granule,Paraspeckle,Nucleolus
P26373	Nuclear stress body,Nucleolus
P26639
P26640	Stress granule
P26641	Nucleolus
P27635	Nucleolus
P27708	Stress granule
P27816	Paraspeckle,Stress granule
P28070	Nuclear speckle
P28288
P28331
P29692	Nucleolus,Paraspeckle,Stress granule
P30050	Nuclear body,Nucleolus
P31327	Nucleolus
P31689	Nuclear body,Stress granule,Nucleolus
P31943	Splicesome,Nuclear speckle,Stress granule,SMN complex,Paraspeckle,Nucleolus
P32322	Stress granule
P32969	Nucleolus
P33176
P33991	Stress granule,Nucleolus
P33992	Paraspeckle,Stress granule,Nucleolus
P33993	Nucleolus,P-body,Stress granule
P34897	Nucleolus
P35232	Stress granule,Nuclear stress body
P35268	Nucleolus
P35573	P-body
P35579	Paraspeckle,Nucleolus
P35606
P35658	Stress granule
P35659	Nucleolus
P35998	Nuclear speckle,Stress granule,Nucleolus
P36542
P36578	Nuclear body,Stress granule,Nucleolus
P36776
P37108	Stress granule,Nucleolus
P38159	Splicesome,Sam68 nuclear body,Nuclear stress body,Nuclear body,P-body,Stress granule,Paraspeckle,Nucleolus
P38646	Stress granule,Nuclear stress body,Nucleolus
P38919	Splicesome,Nuclear speckle,Nuclear body,P-body,Stress granule,Nucleolus
P39023	Stress granule,Nucleolus
P39748	P-body,Nucleolus
P40227	Stress granule
P40429	Nucleolus
P40763	Stress granule
P41091	Stress granule,Nucleolus
P41240
P41252
P42166	Nuclear body,Paraspeckle
P42167	Paraspeckle
P42285	Stress granule,Nucleolus
P42704	Stress granule,Nuclear stress body
P42766	Nuclear body,Nucleolus
P43243	Splicesome,Nuclear stress body,P-body,Stress granule,Paraspeckle
P43246	Paraspeckle
P43686
P46013	Stress granule,Nucleolus
P46063	Stress granule,Nuclear stress body,Nucleolus
P46087	P-body,Nucleolus
P46459
P46776	Nuclear body,Nucleolus
P46777	Nucleolus
P46778	Nucleolus
P46779	Nucleolus
P46781	Stress granule,IMP1 ribonucleoprotein granule,Nucleolus
P46783	Nuclear body,Stress granule,Nuclear stress body,Nucleolus
P46977	Stress granule
P47897
P48047	Nuclear stress body
P48444	Stress granule
P48643	Stress granule
P49207	Nucleolus
P49368	Stress granule
P49643
P49736	Nucleolus
P49792	Nuclear pore complex,Nuclear body,P-body
P50454
P50570
P50579	Stress granule
P50914	Nuclear body,Nucleolus
P50991	Stress granule,Nuclear stress body,Nucleolus
P51398
P51532	Nuclear speckle
P51571
P51610	Nuclear body
P51991	Splicesome,Nuclear body,Stress granule,Nuclear stress body
P52272	Splicesome,Nuclear body,P-body,Stress granule,Nucleolus
P52292	Stress granule,Nucleolus
P52701	Stress granule
P52948	Nuclear pore complex,Stress granule
P53618
P53621
P53999	Nucleolus
P54136	Stress granule
P54577	Stress granule
P54886	Stress granule
P55060	Stress granule
P55265	Stress granule,Nuclear stress body,Nucleolus
P55735	Nuclear pore complex
P55769	Splicesome,Nucleolus
P55795	Splicesome,Nuclear speckle,Nuclear body,Stress granule
P56192	Stress granule
P57740	Nuclear pore complex,Stress granule
P58107	Stress granule
P59998	Nucleolus
P60660	Stress granule
P60842	Stress granule
P60866
P60891
P61160
P61163	Stress granule
P61221	Stress granule
P61247	Stress granule,IMP1 ribonucleoprotein granule,Nucleolus
P61254	Nucleolus,P-body,Stress granule
P61313	Nucleolus
P61353	Paraspeckle
P61513	Stress granule
P61619
P61978	Splicesome,Paraspeckle,Nuclear stress body,Stress granule
P62081	Nuclear stress body
P62140	Paraspeckle,Nuclear stress body,Nucleolus
P62191
P62195
P62241	IMP1 ribonucleoprotein granule,Paraspeckle,Nuclear stress body,Nucleolus
P62249	P-body
P62263	Nucleolus
P62266
P62277	Nucleolus
P62280	Stress granule,Nucleolus
P62306	Splicesome,SMN complex,Stress granule
P62314	Splicesome,Cajal body,Stress granule,SMN complex
P62318	Splicesome,Nuclear speckle,SMN complex
P62333	Stress granule
P62424	Nucleolus
P62495	P-body,Stress granule
P62701	P-body,IMP1 ribonucleoprotein granule
P62750	Nucleolus
P62753	Stress granule,Nucleolus
P62805	Nuclear stress body
P62820	Stress granule
P62826	Stress granule
P62829
P62847	Stress granule,Nuclear stress body
P62861	Stress granule,Nucleolus
P62888	Paraspeckle
P62899	Nucleolus
P62906	Nucleolus
P62910	Stress granule,Nucleolus
P62913	Stress granule,P-body,Nucleolus
P62917	Nucleolus
P63010	Stress granule
P63173
P63244	Splicesome,Stress granule
P67809	Splicesome,Nuclear stress body,IMP1 ribonucleoprotein granule,P-body,Stress granule,Paraspeckle,Nucleolus
P67812
P68104	Nucleolus
P68363	Paraspeckle
P68371	Paraspeckle
P68400
P78344	Stress granule
P78347	Stress granule,Nucleolus
P78527	Stress granule,Nucleolus
P83731	Paraspeckle
P84077	Stress granule
P84098	Stress granule,Nucleolus
P84103	Splicesome,Nuclear speckle,Stress granule,SMN complex
Q00325	PML nuclear body,Stress granule
Q00341	Stress granule
Q00610	Nuclear body,Nuclear stress body
Q00839	Splicesome,Nuclear stress body,Spindle apparatus,Nuclear speckle,Nuclear body,P-body,IMP1 ribonucleoprotein granule,SMN complex,Nucleolus
Q01081	Splicesome,Nuclear speckle,Nuclear body,Stress granule
Q01082	Paraspeckle,P-body,Stress granule
Q01130	Splicesome,Nuclear speckle,Nuclear body,Stress granule,Nucleolus
Q01813
Q01844	Nuclear speckle,Nuclear body,Stress granule,SMN complex,Paraspeckle,Nucleolus
Q02218
Q02809
Q02878	Nuclear stress body,Nucleolus
Q04637	Stress granule
Q06124	PML nuclear body,Nucleolus
Q06210	Stress granule,Nucleolus
Q07021	Paraspeckle
Q07065	Stress granule,Nuclear stress body
Q07666	Splicesome,Sam68 nuclear body,Nuclear stress body,Stress granule,Nucleolus
Q07955	Splicesome,Nuclear speckle,PML nuclear body,Stress granule,Nucleolus
Q08211	Splicesome,Nuclear stress body,Nuclear body,P-body,IMP1 ribonucleoprotein granule,Stress granule,Nucleolus
Q08945	Stress granule,Nucleolus
Q08J23	Stress granule,Nuclear stress body
Q09666	Paraspeckle,Nuclear stress body
Q12792	Nuclear speckle
Q12874	Splicesome,Nuclear speckle,Nucleolus
Q12904
Q12905	Splicesome,P-body,Nuclear stress body,IMP1 ribonucleoprotein granule
Q12906	Splicesome,Nuclear body,P-body,IMP1 ribonucleoprotein granule,Stress granule,Nucleolus
Q12931	Stress granule
Q13045	Stress granule
Q13148	Cajal body,Paraspeckle,Stress granule
Q13151	Splicesome,Paraspeckle,Nuclear stress body,Nucleolus
Q13155
Q13177
Q13200	Stress granule
Q13247	Splicesome,Nuclear speckle,Stress granule,Nucleolus
Q13310	Nuclear body,Stress granule,IMP1 ribonucleoprotein granule
Q13347	Stress granule
Q13418
Q13428	Nucleolus
Q13435	Splicesome,Nuclear stress body,Nuclear speckle,Nuclear body,Paraspeckle,Nucleolus
Q13610	Stress granule,Nucleolus
Q13619	Stress granule
Q13813	Paraspeckle,P-body,Nuclear stress body,Stress granule
Q13838	Splicesome,Nuclear speckle,Nuclear body,Nucleolus
Q14152	Stress granule
Q14157	Paraspeckle,Stress granule
Q14203	Stress granule
Q14204	Nuclear stress body,Nucleolus
Q14258	Stress granule,Nuclear stress body
Q14498	Splicesome,Nuclear speckle,Nucleolus
Q14558	Stress granule
Q14566	Stress granule,Paraspeckle,Nucleolus
Q14683	Stress granule,P-body,Nuclear stress body,Nucleolus
Q14839	Nuclear body,Nuclear stress body,Nucleolus
Q14978	Cajal body,Stress granule,Nucleolus
Q14980	P-body,Nuclear stress body
Q14C86	Stress granule
Q15008
Q15019	Stress granule,Nuclear stress body,Nucleolus
Q15021	Stress granule,Nucleolus
Q15029	Splicesome,Nuclear speckle,P-body,Stress granule,Nucleolus
Q15046	Stress granule
Q15149	Stress granule,Nucleolus
Q15165	Stress granule
Q15233	Nuclear stress body,Nuclear body,P-body,Stress granule,SMN complex,Paraspeckle,Nucleolus
Q15287	Splicesome,Nuclear speckle
Q15365	Nucleolus,Splicesome,P-body,Stress granule
Q15366	Splicesome,P-body,Stress granule
Q15393	Splicesome,Nuclear speckle,Stress granule,Nucleolus
Q15424
Q15459	Splicesome,Nuclear speckle,Nuclear body,Paraspeckle
Q15645
Q15717	P-body,Splicesome,Stress granule,Nucleolus
Q16181	Nucleolus
Q16401
Q16513
Q16630	Nucleolus,Nuclear speckle,Paraspeckle,Stress granule
Q16718
Q16795	Stress granule
Q16851
Q16891	Nuclear stress body
Q27J81	Stress granule
Q29RF7	Stress granule
Q2NL82
Q53GS9	Splicesome
Q58FG1
Q5JTH9	Nucleolus
Q5SSJ5
Q5T4S7	Paraspeckle,Stress granule
Q5VYK3	Stress granule
Q6DD88
Q6NZI2	Stress granule
Q6P2Q9	Splicesome,Nuclear speckle,Stress granule,Nuclear stress body
Q6PKG0	Stress granule
Q71UM5	Nucleolus
Q7KZF4	Stress granule
Q7L014	Splicesome,Nuclear speckle,Cajal body,Stress granule
Q7L0Y3	Stress granule
Q7L2E3	P-body,Stress granule
Q7L576	Stress granule
Q7Z2W4	P-body,Stress granule
Q7Z6Z7	Stress granule
Q86TC9
Q86UP2	Stress granule
Q86V81	Splicesome,Nuclear speckle,Paraspeckle,Stress granule,Nucleolus
Q86VP6	Stress granule
Q86W42
Q86Y56	Stress granule
Q8N884
Q8NC51	Paraspeckle,Stress granule,Nuclear stress body
Q8NE71	Stress granule
Q8NF37
Q8TCJ2	Stress granule
Q8TCS8	Stress granule
Q8TDN6	P-body,Nucleolus
Q8TEM1
Q8TEQ6	Nuclear speckle,P-body,Stress granule
Q8WUM4	P-body,Nuclear stress body,Stress granule
Q92499	Stress granule,Nucleolus
Q92616	Nucleolus
Q92769	Nuclear stress body,Nucleolus
Q92841	Splicesome,Nuclear stress body,Nuclear body,SMN complex,Nucleolus
Q92878	Stress granule,Nuclear stress body
Q92900	P-body,Stress granule
Q92922	Nuclear stress body
Q92973	Stress granule
Q92979	Nucleolus
Q969Z0
Q96A33
Q96AG4
Q96D46	Nucleolus
Q96EY1
Q96GQ7	P-body,Nucleolus
Q96HC4	Stress granule
Q96HS1	Stress granule
Q96KA5	Stress granule
Q96N66
Q96P70	Stress granule
Q96PK6	Paraspeckle,Stress granule
Q96T76	Stress granule
Q99613	Stress granule
Q99623	Nuclear stress body
Q99729	Splicesome,Nuclear stress body,IMP1 ribonucleoprotein granule,Stress granule,Paraspeckle,Nucleolus
Q99832	Stress granule,Nuclear stress body,Nucleolus
Q99848	Nucleolus
Q99878	Nuclear stress body,Nucleolus
Q9BQE3	Stress granule
Q9BQG0	SMN complex,Nucleolus
Q9BT73
Q9BUF5	Stress granule
Q9BUQ8	Splicesome,Nuclear speckle,Nucleolus
Q9BVA1
Q9BVP2	Nucleolus
Q9BXP5	Splicesome,Nuclear speckle,Stress granule
Q9BXS5
Q9BY44	Stress granule,Nucleolus
Q9BY77	Nuclear speckle
Q9BZK7
Q9H0A0	Nucleolus
Q9H0S4	Stress granule,Nucleolus
Q9H0U4
Q9H4A6
Q9H8H3
Q9H9B4
Q9HAV4	Stress granule,Nuclear stress body
Q9HB71	Stress granule
Q9NR30	PML nuclear body,Stress granule,P-body,Nucleolus
Q9NR31
Q9NRG9	Nuclear pore complex
Q9NSE4
Q9NTJ3	Stress granule,Nuclear stress body,Nucleolus
Q9NUQ8	Nucleolus
Q9NUU7	Stress granule
Q9NZ01	Stress granule
Q9NZM1
Q9NZN4	Stress granule
Q9P258	Stress granule
Q9P287	Stress granule,Nucleolus
Q9P289
Q9P2E9	Stress granule
Q9P2J5	Stress granule,Nuclear stress body
Q9UBB4
Q9UBX3	Stress granule
Q9UG63	Stress granule
Q9UHB9	Stress granule
Q9UHD1	Stress granule
Q9UHD8
Q9UIA9	Stress granule
Q9UKD2	Stress granule,Nucleolus
Q9UMS4	Splicesome,Nuclear speckle,Nucleolus
Q9UN86	Paraspeckle,Stress granule
Q9UNM6	Stress granule
Q9UQ35	Splicesome,Nuclear stress body,Nuclear speckle,Stress granule,Paraspeckle,Nucleolus
Q9UQ80	Nucleolus
Q9UQE7	Stress granule,P-body,Nuclear stress body,Nucleolus
Q9Y224	Stress granule,Nucleolus
Q9Y230	Nuclear speckle,Paraspeckle,Nucleolus
Q9Y265	Nucleolus
Q9Y285	Stress granule
Q9Y295	Stress granule
Q9Y2W1	Splicesome,Nuclear speckle,Stress granule,SMN complex,Paraspeckle
Q9Y2W2	Splicesome,Nucleolus
Q9Y2Z4
Q9Y383	Nuclear speckle,Stress granule
Q9Y3I0	Stress granule,Nucleolus
Q9Y3T9	Nucleolus
Q9Y3U8	Nucleolus
Q9Y490	Paraspeckle
Q9Y4L1
Q9Y5B9	Stress granule,Nucleolus
Q9Y5M8	Stress granule
Q9Y678	Stress granule
