# Supplementary material for: Hsp90α forms condensate engaging client proteins with RG motif repeats
Source: Royal Society of Chemistry journal article supplement (doi:10.1039/d4sc00267a), 2024-01-01
Supplement: d4sc00267a4.xlsx [file d4sc00267a4.xlsx]

## Sheet: Hsp90 graunle
uniprot	RG_count	GR_count	GRG_count	RGR_count	GGR_count	RRG_count	GRR_count	RGG_count	YGG_count	QN_count
O00159	0	0	0	0	0	0	0	0	0	0
O00203	0	1	0	0	0	0	0	0	0	0
O00232	0	2	0	0	0	0	0	0	0	0
O00303	0	0	0	0	0	0	0	0	0	0
O00425	0	0	0	0	0	0	0	0	0	1
O00429	1	0	0	0	0	0	0	0	0	0
O00487	0	0	0	0	0	0	0	0	0	0
O00541	2	0	0	0	0	0	0	0	0	0
O00571	8	4	0	3	0	0	0	1	2	0
O14579	0	0	0	0	0	0	0	0	0	0
O14949	0	1	0	0	0	0	0	0	0	0
O14980	0	0	0	0	0	0	0	0	0	0
O15031
O15042	2	3	0	0	0	0	1	1	0	2
O15260
O15371	0	0	0	0	0	0	0	0	0	0
O43175
O43242	1	0	0	0	0	1	0	0	0	0
O43390	21	10	9	6	4	0	0	8	0	2
O43592	0	0	0	0	0	0	0	0	0	0
O43684	0	0	0	0	0	0	0	0	0	0
O43776	0	0	0	0	0	0	0	0	0	0
O43809	0	0	0	0	0	0	0	0	0	0
O60610	2	3	1	0	0	0	0	0	0	1
O60684	0	0	0	0	0	0	0	0	0	0
O60701	0	0	0	0	0	0	0	0	0	0
O60716	1	2	0	0	0	0	0	0	0	1
O60832	0	0	0	0	0	0	0	0	0	0
O60841	0	0	0	0	0	0	0	0	0	0
O60884	1	0	0	0	0	0	0	0	0	0
O75369	0	0	0	0	0	0	0	0	0	0
O75475	3	4	0	3	1	1	0	0	0	1
O75530	0	1	0	0	0	0	0	0	0	0
O75533	2	2	1	0	0	0	0	1	1	0
O75534	1	0	0	0	0	0	0	0	0	0
O75643	0	0	0	0	0	0	0	0	0	0
O75694	0	1	0	0	0	0	0	0	0	0
O75964	1	0	0	0	0	0	0	0	0	0
O76021	3	1	1	1	0	0	0	0	0	0
O76031	1	2	0	0	1	0	0	0	0	0
O76094	1	1	0	1	0	0	0	0	0	0
O94776	0	0	0	0	0	0	0	0	0	0
O94906	1	1	1	0	0	0	0	0	0	0
O95163	0	0	0	0	0	0	0	0	0	0
O95232	1	1	0	0	0	0	0	0	0	0
O95373	0	0	0	0	0	0	0	0	0	1
O95433	0	0	0	0	0	0	0	0	0	0
O95573	0	1	0	0	0	0	0	0	0	0
O95782	1	1	0	0	0	0	1	0	0	0
O95816	0	2	0	0	0	0	0	0	0	2
O95831	0	0	0	0	0	0	0	0	0	0
P00533	0	0	0	0	0	0	0	0	0	1
P00966
P02545	2	2	0	1	0	0	0	0	0	2
P04792	1	0	0	0	0	0	0	0	0	0
P04843	0	0	0	0	0	0	0	0	0	0
P04844
P05141
P05198	1	0	0	0	0	0	0	0	0	0
P05387	0	0	0	0	0	0	0	0	0	0
P05388	0	0	0	0	0	0	0	0	0	0
P05783	0	0	0	0	0	0	0	0	0	0
P05787	1	0	0	0	0	0	0	1	2	1
P06493	0	1	0	0	0	0	0	0	0	0
P06576	0	1	0	0	0	0	0	0	0	0
P06748	0	0	0	0	0	0	0	0	0	2
P07355
P07437	0	0	0	0	0	0	0	0	0	0
P07814	0	0	0	0	0	0	0	0	0	3
P07910	4	1	0	0	0	1	0	0	0	0
P08237
P08559	1	0	0	0	0	0	0	0	0	0
P08621	8	5	0	2	0	1	1	3	0	0
P08670	0	1	0	0	0	0	0	0	0	2
P08729	1	1	1	0	0	0	0	0	1	0
P09012	0	0	0	0	0	0	0	0	0	1
P09651	7	6	3	1	2	0	1	4	5	0
P09661	1	1	0	0	0	0	0	0	0	0
P09874	1	1	0	0	0	0	0	0	0	1
P0DMV9	0	0	0	0	0	0	0	0	0	0
P10412	0	0	0	0	0	0	0	0	0	0
P10515	0	0	0	0	0	0	0	0	1	1
P10620
P11021	0	0	0	0	0	0	0	0	0	1
P11142	0	1	0	0	0	0	0	0	0	0
P11172
P11216	1	0	0	0	0	0	0	0	0	0
P11387	0	0	0	0	0	0	0	0	0	0
P11498
P11586	0	0	0	0	0	0	0	0	0	0
P11908	0	0	0	0	0	0	0	0	0	0
P12081	1	0	0	0	0	0	0	0	0	0
P12236
P12268
P12270	9	10	2	1	2	0	1	1	0	11
P12956	0	1	0	0	0	0	0	0	0	0
P13010	0	0	0	0	0	0	0	0	0	0
P13639	0	0	0	0	0	0	0	0	0	0
P14618
P14678	8	6	5	0	0	0	0	1	0	0
P14866	0	2	0	0	2	0	0	0	1	0
P14868	0	0	0	0	0	0	0	0	0	0
P15880	11	8	7	7	0	0	0	3	0	0
P15924	2	1	0	1	0	2	0	0	0	2
P16401	0	0	0	0	0	0	0	0	0	0
P16403	0	0	0	0	0	0	0	0	0	0
P16615	0	0	0	0	0	0	0	0	0	0
P17480	2	1	0	0	0	0	0	0	0	1
P17844	2	1	0	1	0	0	0	0	0	0
P17858
P17980	0	0	0	0	0	0	0	0	0	0
P17987	0	0	0	0	0	0	0	0	0	0
P18077	1	1	0	0	0	0	0	0	0	0
P18085	0	0	0	0	0	0	0	0	0	0
P18124	0	0	0	0	0	0	0	0	0	0
P18583	2	5	0	2	0	0	2	0	0	0
P18621	1	0	0	0	0	0	0	0	0	0
P19338	12	11	9	1	8	0	0	10	0	3
P19525	0	2	0	0	0	0	0	0	0	0
P20042	0	0	0	0	0	0	0	0	0	0
P20700	2	2	0	1	0	0	0	0	0	0
P21333	0	0	0	0	0	0	0	0	0	1
P22102
P22234	0	0	0	0	0	0	0	0	0	0
P22626	2	3	2	0	2	0	0	1	7	0
P22695	0	0	0	0	0	0	0	0	0	0
P23246	8	5	2	1	3	1	0	5	0	1
P23396	0	0	0	0	0	0	0	0	0	0
P23588	7	4	0	0	1	1	1	1	1	0
P24534	0	0	0	0	0	0	0	0	0	0
P24539
P24666
P24941	0	0	0	0	0	0	0	0	0	0
P25205	0	0	0	0	0	0	0	0	0	0
P25685	1	2	0	0	1	0	0	0	0	0
P25705
P25789	0	0	0	0	0	0	0	0	0	0
P26196	1	0	0	0	0	0	0	0	0	1
P26368	1	0	0	0	0	0	0	0	0	0
P26373	1	1	1	0	0	0	0	0	0	0
P26639	0	1	0	0	1	0	0	0	0	0
P26640	0	0	0	0	0	0	0	0	0	0
P26641	0	0	0	0	0	0	0	0	0	0
P27635	1	1	0	0	0	0	1	0	0	0
P27708
P27816	0	2	0	0	1	0	0	0	0	3
P28070	0	0	0	0	0	0	0	0	0	0
P28288	0	0	0	0	0	0	0	0	0	0
P28331
P29692	1	0	0	0	0	0	0	0	0	0
P30050	0	1	0	0	0	0	0	0	0	1
P31327	0	0	0	0	0	0	0	0	0	0
P31689	1	0	0	0	0	0	0	1	0	0
P31943	0	0	0	0	0	0	0	0	3	0
P32322	0	0	0	0	0	0	0	0	0	0
P32969	0	0	0	0	0	0	0	0	0	0
P33176	3	0	0	0	0	1	0	2	0	3
P33991	4	1	0	1	0	3	0	0	0	0
P33992	0	0	0	0	0	0	0	0	0	0
P33993	0	0	0	0	0	0	0	0	0	0
P34897	1	0	0	0	0	0	0	0	0	0
P35232	0	0	0	0	0	0	0	0	0	0
P35268	0	0	0	0	0	0	0	0	0	0
P35573
P35579	2	1	0	0	0	1	0	0	0	3
P35606	0	0	0	0	0	0	0	0	0	0
P35658	1	3	1	0	0	0	0	1	0	1
P35659	0	0	0	0	0	0	0	0	0	1
P35998	0	0	0	0	0	0	0	0	0	0
P36542
P36578	0	0	0	0	0	0	0	0	0	0
P36776	0	0	0	0	0	0	0	0	0	0
P37108	0	1	0	0	0	0	0	0	0	0
P38159	19	10	2	1	4	1	1	6	3	0
P38646	1	0	0	0	0	0	0	0	0	0
P38919	1	0	0	0	0	0	0	0	0	0
P39023	1	1	0	0	0	0	0	0	0	0
P39748	1	1	0	0	0	0	0	0	0	0
P40227
P40429	0	0	0	0	0	0	0	0	0	0
P40763	0	0	0	0	0	0	0	0	0	0
P41091	0	0	0	0	0	0	0	0	0	0
P41240
P41252
P42166	1	4	1	0	0	0	0	0	0	2
P42167	1	5	0	0	0	0	0	0	0	1
P42285	0	0	0	0	0	0	0	0	0	0
P42704	0	0	0	0	0	0	0	0	0	0
P42766	1	0	0	0	0	0	0	0	0	0
P43243	6	5	1	0	0	0	0	0	0	0
P43246	0	0	0	0	0	0	0	0	0	0
P43686	0	0	0	0	0	0	0	0	0	0
P46013	8	7	0	0	1	0	1	2	0	9
P46063	0	0	0	0	0	0	0	0	0	1
P46087	3	4	0	0	0	0	0	0	0	2
P46459	0	1	0	0	0	0	0	0	0	0
P46776	1	1	0	0	0	0	0	0	0	0
P46777	0	0	0	0	0	0	0	0	0	0
P46778	1	0	0	0	0	1	0	0	0	0
P46779	0	0	0	0	0	0	0	0	0	0
P46781	0	2	0	0	1	0	0	0	1	0
P46783	4	3	2	1	0	0	0	1	0	0
P46977
P47897	0	0	0	0	0	0	0	0	0	0
P48047
P48444
P48643	0	0	0	0	0	0	0	0	0	0
P49207	1	1	0	0	0	0	0	0	1	0
P49368	0	0	0	0	0	0	0	0	0	0
P49643	0	1	0	0	0	0	0	0	0	0
P49736	3	4	1	0	0	2	0	0	0	0
P49792	2	2	1	0	0	0	0	0	0	0
P50454	0	0	0	0	0	0	0	0	0	0
P50570	1	1	0	0	0	0	0	0	0	0
P50579	1	1	0	0	0	0	0	0	0	0
P50914	0	0	0	0	0	0	0	0	0	0
P50991	1	1	1	0	1	0	0	0	0	0
P51398
P51532	6	6	1	1	1	0	1	0	0	3
P51571
P51610	0	1	0	0	0	0	0	0	0	0
P51991	7	5	2	0	2	1	1	4	7	0
P52272	1	1	0	0	0	0	0	1	0	1
P52292	0	0	0	0	0	0	0	0	0	1
P52701	1	1	0	0	1	0	0	0	0	1
P52948	0	1	0	0	0	0	0	0	0	2
P53618	0	0	0	0	0	0	0	0	0	0
P53621
P53999	0	1	0	0	0	0	0	0	0	0
P54136
P54577	0	0	0	0	0	0	0	0	0	0
P54886
P55060	0	0	0	0	0	0	0	0	0	0
P55265	6	2	0	2	0	0	0	0	0	0
P55735	0	0	0	0	0	0	0	0	0	1
P55769	1	1	0	0	0	0	0	0	0	0
P55795	0	0	0	0	0	0	0	0	3	0
P56192	0	0	0	0	0	0	0	0	0	0
P57740	0	0	0	0	0	0	0	0	0	0
P58107	10	10	5	0	0	0	0	0	0	0
P59998
P60660	0	0	0	0	0	0	0	0	0	0
P60842	0	0	0	0	0	0	0	0	0	0
P60866	1	0	0	0	0	0	0	0	0	0
P60891
P61160
P61163	0	0	0	0	0	0	0	0	0	0
P61221	0	0	0	0	0	0	0	0	0	0
P61247	0	0	0	0	0	0	0	0	0	0
P61254	1	0	0	0	0	0	0	0	0	0
P61313	0	0	0	0	0	0	0	0	0	0
P61353	0	2	0	0	0	0	0	0	0	0
P61513	0	0	0	0	0	0	0	0	0	0
P61619
P61978	6	5	3	1	3	2	0	3	0	2
P62081	0	1	0	0	1	0	0	0	0	0
P62140	0	1	0	0	0	0	0	0	1	0
P62191	1	0	0	0	0	0	0	0	0	0
P62195	0	0	0	0	0	0	0	0	0	1
P62241	1	3	0	0	0	0	0	1	0	0
P62249	1	2	0	0	0	0	0	0	0	0
P62263	1	3	0	1	1	1	2	0	0	0
P62266	1	1	0	0	0	0	0	0	0	0
P62277	0	1	0	0	0	0	0	0	0	0
P62280	0	0	0	0	0	0	0	0	0	1
P62306	1	0	0	0	0	0	0	0	0	0
P62314	10	9	9	8	0	0	0	1	0	0
P62318	6	5	4	2	0	0	0	0	0	0
P62333	0	1	0	0	0	0	0	0	0	0
P62424	0	0	0	0	0	0	0	0	0	0
P62495	0	0	0	0	0	0	0	0	0	0
P62701	2	0	0	0	0	0	0	0	0	0
P62750	0	0	0	0	0	0	0	0	0	0
P62753	1	1	0	0	0	0	0	0	0	0
P62805	3	2	1	0	0	1	0	1	0	0
P62820	0	0	0	0	0	0	0	0	0	0
P62826	0	0	0	0	0	0	0	0	0	0
P62829	2	2	1	1	0	0	0	1	0	0
P62847	1	0	0	0	0	0	0	0	0	0
P62861	1	1	0	0	0	0	0	0	0	0
P62888	0	0	0	0	0	0	0	0	0	0
P62899	0	1	0	0	0	0	0	0	0	0
P62906	0	0	0	0	0	0	0	0	0	0
P62910	1	0	0	0	0	0	0	0	0	0
P62913	0	0	0	0	0	0	0	0	0	0
P62917	1	2	0	0	0	0	0	0	0	0
P63010	0	0	0	0	0	0	0	0	0	0
P63173	0	0	0	0	0	0	0	0	0	0
P63244
P67809	3	2	0	0	0	2	1	0	0	3
P67812
P68104	0	1	0	0	0	0	0	0	0	0
P68363	0	0	0	0	0	0	0	0	0	0
P68371	0	0	0	0	0	0	0	0	0	0
P68400	0	0	0	0	0	0	0	0	0	0
P78344	2	0	0	0	0	0	0	0	0	1
P78347	0	0	0	0	0	0	0	0	0	0
P78527
P83731	0	1	0	0	0	0	1	0	0	0
P84077
P84098	0	0	0	0	0	0	0	0	0	0
P84103	1	2	0	0	0	0	1	0	0	0
Q00325	0	0	0	0	0	0	0	0	0	0
Q00341	1	0	0	0	0	0	0	0	0	0
Q00610	0	0	0	0	0	0	0	0	0	0
Q00839	18	7	4	2	2	1	0	7	0	2
Q01081	2	4	1	1	1	0	1	1	0	0
Q01082	0	0	0	0	0	0	0	0	0	1
Q01130	2	5	0	0	0	1	1	0	1	0
Q01813	0	0	0	0	0	0	0	0	0	0
Q01844	30	14	11	3	9	2	2	22	0	2
Q02218
Q02809
Q02878	1	1	0	0	0	0	0	0	0	0
Q04637	11	4	0	1	1	1	0	3	0	1
Q06124	0	0	0	0	0	0	0	0	0	0
Q06210
Q07021	1	0	0	0	0	0	0	0	0	0
Q07065	2	2	0	0	0	0	0	1	0	2
Q07666	14	5	3	3	0	0	0	2	0	0
Q07955	6	5	2	1	0	1	0	2	0	0
Q08211	8	2	2	0	1	0	0	3	2	0
Q08945	3	1	1	0	1	0	0	0	0	0
Q08J23	2	2	0	1	0	0	2	0	0	0
Q09666	9	3	0	0	0	0	0	0	0	1
Q12792	2	0	0	0	0	0	0	0	0	0
Q12874	0	0	0	0	0	0	0	0	0	0
Q12904	0	0	0	0	0	0	0	0	0	1
Q12905	5	3	2	2	1	0	0	2	0	0
Q12906	9	8	5	5	1	1	0	2	2	2
Q12931	0	0	0	0	0	0	0	0	0	0
Q13045
Q13148	0	0	0	0	0	0	0	0	0	2
Q13151	5	5	3	1	4	0	0	4	6	1
Q13155
Q13177	0	0	0	0	0	0	0	0	0	0
Q13200	0	1	0	0	1	0	0	0	0	0
Q13247	2	6	0	0	0	0	0	0	0	0
Q13310	0	0	0	0	0	0	0	0	0	0
Q13347
Q13418	0	0	0	0	0	0	0	0	0	0
Q13428	1	1	0	0	0	0	0	0	0	1
Q13435	6	0	0	0	0	0	0	1	0	0
Q13610	0	2	0	0	0	0	1	0	0	0
Q13619	0	1	0	0	0	0	0	0	0	0
Q13813	0	1	0	0	0	0	0	0	0	1
Q13838	0	0	0	0	0	0	0	0	0	0
Q14152	29	1	0	0	0	17	0	1	0	0
Q14157	13	10	5	6	1	4	2	3	0	4
Q14203	4	1	0	0	0	0	0	0	0	1
Q14204	0	0	0	0	0	0	0	0	0	1
Q14258	0	1	0	0	0	0	0	0	0	0
Q14498	2	1	0	1	0	0	0	0	0	0
Q14558
Q14566	0	0	0	0	0	0	0	0	0	0
Q14683	0	1	0	0	0	0	0	0	0	2
Q14839	0	1	0	0	0	0	0	0	0	1
Q14978	3	0	0	0	0	0	0	1	0	2
Q14980	8	9	0	2	0	1	0	0	0	3
Q14C86	1	0	0	0	0	0	0	0	0	1
Q15008	1	0	0	0	0	0	0	0	0	0
Q15019	0	0	0	0	0	0	0	0	0	0
Q15021	2	0	0	0	0	1	0	0	0	0
Q15029	0	1	0	0	0	0	0	0	0	0
Q15046	0	0	0	0	0	0	0	0	0	0
Q15149	5	5	0	0	0	2	1	1	0	0
Q15165
Q15233	1	0	0	0	0	0	0	0	0	2
Q15287	1	3	0	1	0	0	1	0	0	0
Q15365
Q15366
Q15393	0	0	0	0	0	0	0	0	0	0
Q15424	7	9	2	1	0	0	1	1	0	0
Q15459	0	1	0	0	0	0	0	0	0	1
Q15645	0	0	0	0	0	0	0	0	0	0
Q15717
Q16181	0	0	0	0	0	0	0	0	0	1
Q16401	0	0	0	0	0	0	0	0	0	0
Q16513	2	1	0	1	0	0	0	0	0	0
Q16630	5	5	2	2	1	0	0	0	1	1
Q16718	0	0	0	0	0	0	0	0	0	0
Q16795
Q16851	0	0	0	0	0	0	0	0	0	0
Q16891	0	0	0	0	0	0	0	0	0	1
Q27J81	7	3	1	2	0	0	0	0	0	1
Q29RF7	2	3	0	1	0	1	1	0	0	0
Q2NL82	3	4	1	1	1	0	0	0	0	1
Q53GS9	4	3	0	0	0	0	0	0	0	0
Q58FG1	0	0	0	0	0	0	0	0	0	0
Q5JTH9	3	6	1	1	0	1	0	0	0	0
Q5SSJ5	4	0	0	0	0	1	0	0	0	0
Q5T4S7	0	1	0	0	0	0	0	0	0	0
Q5VYK3	0	0	0	0	0	0	0	0	0	0
Q6DD88	1	1	0	0	0	0	0	0	0	0
Q6NZI2	3	0	0	0	0	1	0	0	0	0
Q6P2Q9	1	0	0	0	0	0	0	0	0	0
Q6PKG0	11	11	7	7	0	0	1	3	0	0
Q71UM5	0	0	0	0	0	0	0	0	0	0
Q7KZF4	3	0	0	0	0	0	0	1	0	0
Q7L014	5	4	0	2	0	0	1	1	0	3
Q7L0Y3	0	0	0	0	0	0	0	0	0	0
Q7L2E3	2	2	0	0	0	0	0	0	0	0
Q7L576	0	0	0	0	0	0	0	0	0	0
Q7Z2W4	0	0	0	0	0	0	0	0	0	0
Q7Z6Z7	1	2	0	0	0	0	0	0	0	3
Q86TC9	1	0	0	0	0	0	0	0	0	4
Q86UP2	0	0	0	0	0	0	0	0	0	9
Q86V81	14	11	6	4	4	1	0	6	0	0
Q86VP6	0	0	0	0	0	0	0	0	0	0
Q86W42
Q86Y56	0	1	0	0	0	0	1	0	0	0
Q8N884	2	0	0	0	0	0	0	0	0	0
Q8NC51	15	14	11	4	5	0	1	7	0	1
Q8NE71	1	1	0	0	0	0	1	1	0	1
Q8NF37	1	1	0	0	0	0	0	0	0	0
Q8TCJ2	1	0	0	0	0	0	0	0	0	0
Q8TCS8	0	1	0	0	0	0	0	0	0	0
Q8TDN6	1	0	0	0	0	1	0	1	0	0
Q8TEM1	0	0	0	0	0	0	0	0	0	0
Q8TEQ6	0	0	0	0	0	0	0	0	0	1
Q8WUM4	0	0	0	0	0	0	0	0	0	0
Q92499
Q92616	0	0	0	0	0	0	0	0	0	0
Q92769	0	1	0	0	1	0	1	0	0	0
Q92841	4	3	0	0	1	0	1	3	0	0
Q92878	0	1	0	0	0	0	0	0	0	3
Q92900	2	3	2	0	1	0	0	1	0	1
Q92922	0	1	0	0	0	0	0	0	0	2
Q92973	0	0	0	0	0	0	0	0	0	0
Q92979	0	1	0	0	1	0	1	0	0	0
Q969Z0	0	0	0	0	0	0	0	0	0	0
Q96A33	0	0	0	0	0	0	0	0	0	0
Q96AG4	0	0	0	0	0	0	0	0	0	0
Q96D46	0	0	0	0	0	0	0	0	0	0
Q96EY1	0	0	0	0	0	0	0	0	0	0
Q96GQ7	4	1	0	0	0	2	1	2	0	0
Q96HC4	1	2	0	0	0	1	0	0	0	2
Q96HS1	0	0	0	0	0	0	0	0	0	0
Q96KA5	0	0	0	0	0	0	0	0	0	0
Q96N66	0	0	0	0	0	0	0	0	0	0
Q96P70	0	0	0	0	0	0	0	0	0	0
Q96PK6	2	1	0	0	0	0	0	0	2	0
Q96T76	1	0	0	0	0	0	0	0	0	0
Q99613	2	0	0	0	0	1	0	2	1	1
Q99623	1	0	0	0	0	0	0	0	0	2
Q99729	8	4	2	1	1	2	0	1	1	2
Q99832	3	4	3	3	0	0	0	0	0	0
Q99848	2	1	1	0	0	0	0	0	0	1
Q99878	1	2	1	0	0	0	0	0	0	0
Q9BQE3	0	0	0	0	0	0	0	0	0	0
Q9BQG0	1	1	0	0	0	0	0	0	0	0
Q9BT73	0	0	0	0	0	0	0	0	0	0
Q9BUF5	0	0	0	0	0	0	0	0	0	0
Q9BUQ8	3	4	2	0	0	1	0	1	0	0
Q9BVA1	0	0	0	0	0	0	0	0	0	0
Q9BVP2	1	0	0	0	0	0	0	0	0	1
Q9BXP5	6	4	1	1	0	1	0	0	0	0
Q9BXS5
Q9BY44	1	0	0	0	0	0	0	0	0	1
Q9BY77	1	1	0	0	0	0	0	0	0	0
Q9BZK7
Q9H0A0	1	0	0	0	0	0	0	0	0	0
Q9H0S4	0	1	0	0	0	0	0	0	0	0
Q9H0U4	0	0	0	0	0	0	0	0	0	0
Q9H4A6	0	0	0	0	0	0	0	0	0	0
Q9H8H3
Q9H9B4	0	0	0	0	0	0	0	0	0	0
Q9HAV4	0	0	0	0	0	0	0	0	0	0
Q9HB71	0	0	0	0	0	0	0	0	0	0
Q9NR30	6	0	0	0	0	0	0	0	1	2
Q9NR31
Q9NRG9	1	0	0	0	0	0	0	0	0	0
Q9NSE4	1	1	0	0	0	0	0	0	0	0
Q9NTJ3	0	1	0	0	0	0	0	0	0	0
Q9NUQ8	0	0	0	0	0	0	0	0	0	0
Q9NUU7	0	0	0	0	0	0	0	0	0	0
Q9NZ01
Q9NZM1	1	0	0	0	0	0	0	0	0	1
Q9NZN4	0	1	0	0	0	0	0	0	0	0
Q9P258	1	1	0	0	0	0	0	1	0	0
Q9P287	0	0	0	0	0	0	0	0	0	0
Q9P289	0	0	0	0	0	0	0	0	0	2
Q9P2E9	0	4	0	0	0	0	0	0	0	28
Q9P2J5	0	0	0	0	0	0	0	0	0	0
Q9UBB4	0	0	0	0	0	0	0	0	0	1
Q9UBX3
Q9UG63	0	1	0	0	0	0	0	0	0	0
Q9UHB9	2	1	1	0	1	0	0	0	0	0
Q9UHD1	1	1	0	0	0	0	0	0	0	0
Q9UHD8	0	1	0	0	0	0	0	0	0	0
Q9UIA9	0	0	0	0	0	0	0	0	0	0
Q9UKD2	0	1	0	0	0	0	0	0	0	1
Q9UMS4	0	0	0	0	0	0	0	0	0	0
Q9UN86	9	4	3	0	0	0	0	2	0	1
Q9UNM6	0	0	0	0	0	0	0	0	0	1
Q9UQ35	31	29	1	18	1	18	3	1	0	1
Q9UQ80	0	0	0	0	0	0	0	0	0	0
Q9UQE7	3	1	1	0	0	0	0	0	0	0
Q9Y224	0	1	0	0	0	0	0	0	0	0
Q9Y230	0	0	0	0	0	0	0	0	0	0
Q9Y265	0	0	0	0	0	0	0	0	0	0
Q9Y285	0	0	0	0	0	0	0	0	0	0
Q9Y295	0	0	0	0	0	0	0	0	0	0
Q9Y2W1	21	10	5	7	1	1	0	2	0	2
Q9Y2W2	3	5	0	0	0	0	1	0	0	0
Q9Y2Z4
Q9Y383	0	1	0	0	0	0	0	0	0	0
Q9Y3I0
Q9Y3T9	2	1	0	0	0	0	0	0	0	0
Q9Y3U8	1	1	0	1	0	1	0	0	0	0
Q9Y490	1	0	0	0	0	0	0	0	0	2
Q9Y4L1	0	0	0	0	0	0	0	0	0	0
Q9Y5B9	3	2	2	0	0	0	0	0	0	0
Q9Y5M8	1	1	1	0	1	0	0	0	0	0
Q9Y678	0	0	0	0	0	0	0	0	0	0

## Sheet: Control
uniprot	RG_count	GR_count	GRG_count	RGR_count	GGR_count	RRG_count	GRR_count	RGG_count	YGG_count	QN_count
A6NDG6	0	0	0	0	0	0	0	0	0	0
E9PAV3	1	0	0	0	0	0	0	0	0	1
O00148	0	0	0	0	0	0	0	0	0	0
O00151	0	0	0	0	0	0	0	0	0	0
O00159	0	0	0	0	0	0	0	0	0	0
O00203	0	1	0	0	0	0	0	0	0	0
O00217
O00231	0	0	0	0	0	0	0	0	0	0
O00232	0	2	0	0	0	0	0	0	0	0
O00299	0	0	0	0	0	0	0	0	0	0
O00303	0	0	0	0	0	0	0	0	0	0
O00410	0	0	0	0	0	0	0	0	0	0
O00425	0	0	0	0	0	0	0	0	0	1
O00429	1	0	0	0	0	0	0	0	0	0
O00442	0	0	0	0	0	0	0	0	0	0
O00469
O00487	0	0	0	0	0	0	0	0	0	0
O00541	2	0	0	0	0	0	0	0	0	0
O00560
O00571	8	4	0	3	0	0	0	1	2	0
O00625	2	3	1	0	1	0	0	0	0	0
O00743
O00764	0	0	0	0	0	0	0	0	0	0
O14579	0	0	0	0	0	0	0	0	0	0
O14617	1	0	0	0	0	0	0	0	0	1
O14744	0	0	0	0	0	0	0	0	0	0
O14773	0	1	0	0	0	0	0	0	0	0
O14818	0	0	0	0	0	0	0	0	0	0
O14828	0	0	0	0	0	0	0	0	0	1
O14880
O14925	0	0	0	0	0	0	0	0	0	0
O14929	0	0	0	0	0	0	0	0	0	0
O14949	0	1	0	0	0	0	0	0	0	0
O14975
O14979	8	6	4	2	3	1	1	2	2	3
O14980	0	0	0	0	0	0	0	0	0	0
O15031
O15042	2	3	0	0	0	0	1	1	0	2
O15067	0	0	0	0	0	0	0	0	0	0
O15143	0	0	0	0	0	0	0	0	0	0
O15160	0	0	0	0	0	0	0	0	0	0
O15260
O15371	0	0	0	0	0	0	0	0	0	0
O15372	1	0	0	0	0	0	0	0	0	0
O15397	1	1	1	0	0	0	0	0	0	0
O15427	0	0	0	0	0	0	0	0	0	0
O43143	1	0	0	0	0	0	0	0	0	0
O43156	0	0	0	0	0	0	0	0	0	1
O43172	0	0	0	0	0	0	0	0	0	0
O43175
O43242	1	0	0	0	0	1	0	0	0	0
O43324	0	0	0	0	0	0	0	0	0	0
O43390	21	10	9	6	4	0	0	8	0	2
O43592	0	0	0	0	0	0	0	0	0	0
O43615	0	2	0	0	0	0	0	0	0	0
O43684	0	0	0	0	0	0	0	0	0	0
O43707	0	0	0	0	0	0	0	0	0	0
O43747	0	0	0	0	0	0	0	0	0	0
O43776	0	0	0	0	0	0	0	0	0	0
O43809	0	0	0	0	0	0	0	0	0	0
O43813	0	1	0	0	0	0	0	0	0	0
O43920	0	1	0	0	0	0	0	0	0	0
O60264	2	3	1	1	0	0	0	0	0	1
O60313	0	0	0	0	0	0	0	0	0	0
O60488	0	0	0	0	0	0	0	0	1	0
O60493	0	0	0	0	0	0	0	0	0	1
O60506	21	9	8	6	3	0	0	8	0	1
O60610	2	3	1	0	0	0	0	0	0	1
O60664	2	0	0	0	0	0	0	0	0	1
O60684	0	0	0	0	0	0	0	0	0	0
O60701	0	0	0	0	0	0	0	0	0	0
O60716	1	2	0	0	0	0	0	0	0	1
O60749	0	0	0	0	0	0	0	0	0	0
O60763	0	2	0	0	0	0	0	0	0	0
O60832	0	0	0	0	0	0	0	0	0	0
O60841	0	0	0	0	0	0	0	0	0	0
O60869	2	2	0	0	0	1	0	0	0	1
O60884	1	0	0	0	0	0	0	0	0	0
O75131	0	0	0	0	0	0	0	0	0	0
O75153	0	0	0	0	0	0	0	0	0	0
O75306
O75340	0	0	0	0	0	0	0	0	0	0
O75351	0	0	0	0	0	0	0	0	0	1
O75352
O75367	1	2	0	0	0	0	0	1	0	0
O75369	0	0	0	0	0	0	0	0	0	0
O75380	0	1	0	0	0	0	0	0	0	0
O75390	0	0	0	0	0	0	0	0	0	0
O75396	0	1	0	0	0	0	0	0	0	0
O75400	1	1	0	0	0	0	0	1	0	1
O75436	0	0	0	0	0	0	0	0	0	0
O75439
O75475	3	4	0	3	1	1	0	0	0	1
O75489	0	0	0	0	0	0	0	0	0	0
O75521
O75530	0	1	0	0	0	0	0	0	0	0
O75531	1	0	0	0	0	0	0	0	0	0
O75533	2	2	1	0	0	0	0	1	1	0
O75534	1	0	0	0	0	0	0	0	0	0
O75607	0	2	0	0	1	0	0	0	0	0
O75643	0	0	0	0	0	0	0	0	0	0
O75694	0	1	0	0	0	0	0	0	0	0
O75718	0	0	0	0	0	0	0	0	0	0
O75794	1	1	0	0	0	0	0	0	0	1
O75821	1	0	0	0	0	1	0	0	0	1
O75874
O75947	0	1	0	0	0	0	0	0	0	1
O75964	1	0	0	0	0	0	0	0	0	0
O76021	3	1	1	1	0	0	0	0	0	0
O76031	1	2	0	0	1	0	0	0	0	0
O76094	1	1	0	1	0	0	0	0	0	0
O94776	0	0	0	0	0	0	0	0	0	0
O94826	2	2	1	1	0	0	0	0	0	0
O94906	1	1	1	0	0	0	0	0	0	0
O94964	4	3	0	0	0	1	0	0	0	2
O94973	1	0	0	0	0	0	0	0	0	0
O94979	0	0	0	0	0	0	0	0	0	1
O95071	1	4	0	1	0	0	1	0	0	0
O95163	0	0	0	0	0	0	0	0	0	0
O95168	1	0	0	0	0	1	0	0	0	0
O95232	1	1	0	0	0	0	0	0	0	0
O95340	2	0	0	0	0	0	0	1	0	0
O95347	0	1	0	0	0	0	0	0	0	2
O95373	0	0	0	0	0	0	0	0	0	1
O95433	0	0	0	0	0	0	0	0	0	0
O95573	0	1	0	0	0	0	0	0	0	0
O95757	0	0	0	0	0	0	0	0	0	1
O95782	1	1	0	0	0	0	1	0	0	0
O95816	0	2	0	0	0	0	0	0	0	2
O95831	0	0	0	0	0	0	0	0	0	0
O95983	0	0	0	0	0	0	0	0	0	0
O96008	0	0	0	0	0	0	0	0	0	0
O96019	0	0	0	0	0	0	0	0	1	0
P00338	0	0	0	0	0	0	0	0	0	0
P00367	1	0	0	0	0	0	0	0	0	0
P00387
P00403
P00491	0	0	0	0	0	0	0	0	0	0
P00505
P00533	0	0	0	0	0	0	0	0	0	1
P00558	0	0	0	0	0	0	0	0	0	0
P00568	0	0	0	0	0	0	0	0	0	0
P00966
P02545	2	2	0	1	0	0	0	0	0	2
P02786
P04075	0	0	0	0	0	0	0	0	0	0
P04080	0	0	0	0	0	0	0	0	0	0
P04083	0	0	0	0	0	0	0	0	0	0
P04264	7	5	4	0	5	0	0	3	2	0
P04406
P04439	0	0	0	0	0	0	0	0	0	0
P04792	1	0	0	0	0	0	0	0	0	0
P04843	0	0	0	0	0	0	0	0	0	0
P04844
P05023	1	1	0	0	0	0	0	0	0	0
P05141
P05198	1	0	0	0	0	0	0	0	0	0
P05386	0	0	0	0	0	0	0	0	0	0
P05387	0	0	0	0	0	0	0	0	0	0
P05388	0	0	0	0	0	0	0	0	0	0
P05455	1	1	0	0	0	0	1	0	0	1
P05556	1	0	0	0	0	0	0	0	0	0
P05783	0	0	0	0	0	0	0	0	0	0
P05787	1	0	0	0	0	0	0	1	2	1
P06493	0	1	0	0	0	0	0	0	0	0
P06576	0	1	0	0	0	0	0	0	0	0
P06733	0	1	0	0	0	0	0	0	0	0
P06744	0	0	0	0	0	0	0	0	0	0
P06748	0	0	0	0	0	0	0	0	0	2
P07108	0	0	0	0	0	0	0	0	0	0
P07195	0	0	0	0	0	0	0	0	0	0
P07237	0	0	0	0	0	0	0	0	0	0
P07355
P07384
P07437	0	0	0	0	0	0	0	0	0	0
P07686
P07737
P07741	0	0	0	0	0	0	0	0	0	0
P07814	0	0	0	0	0	0	0	0	0	3
P07910	4	1	0	0	0	1	0	0	0	0
P07954	0	0	0	0	0	0	0	0	0	0
P08133	1	0	0	0	0	0	0	0	0	0
P08195	0	1	0	0	0	0	0	0	0	1
P08237
P08238	0	0	0	0	0	0	0	0	0	0
P08240	3	1	1	0	0	0	0	0	0	1
P08243	0	0	0	0	0	0	0	0	0	0
P08559	1	0	0	0	0	0	0	0	0	0
P08574	0	0	0	0	0	0	0	0	0	0
P08579	0	0	0	0	0	0	0	0	0	0
P08621	8	5	0	2	0	1	1	3	0	0
P08670	0	1	0	0	0	0	0	0	0	2
P08708	3	1	0	0	0	0	0	0	0	0
P08729	1	1	1	0	0	0	0	0	1	0
P08758	1	0	0	0	0	0	0	0	0	0
P08865	0	0	0	0	0	0	0	0	0	0
P09001	0	0	0	0	0	0	0	0	0	0
P09012	0	0	0	0	0	0	0	0	0	1
P09234	0	1	0	0	0	0	0	0	0	0
P09382	0	0	0	0	0	0	0	0	0	0
P09429	1	0	0	0	0	0	0	0	0	0
P09525	0	0	0	0	0	0	0	0	0	0
P09622
P09651	7	6	3	1	2	0	1	4	5	0
P09661	1	1	0	0	0	0	0	0	0	0
P09874	1	1	0	0	0	0	0	0	0	1
P0CW18	0	0	0	0	0	0	0	0	0	0
P0DMV9	0	0	0	0	0	0	0	0	0	0
P10155	0	0	0	0	0	0	0	0	0	0
P10412	0	0	0	0	0	0	0	0	0	0
P10515	0	0	0	0	0	0	0	0	1	1
P10599	0	0	0	0	0	0	0	0	0	0
P10620
P10809	0	0	0	0	0	0	0	0	0	0
P11021	0	0	0	0	0	0	0	0	0	1
P11142	0	1	0	0	0	0	0	0	0	0
P11172
P11177
P11216	1	0	0	0	0	0	0	0	0	0
P11310
P11387	0	0	0	0	0	0	0	0	0	0
P11413
P11498
P11586	0	0	0	0	0	0	0	0	0	0
P11717	2	2	1	0	0	0	0	0	0	0
P11908	0	0	0	0	0	0	0	0	0	0
P11940	0	0	0	0	0	0	0	0	0	0
P12004	0	0	0	0	0	0	0	0	0	0
P12081	1	0	0	0	0	0	0	0	0	0
P12235
P12236
P12268
P12270	9	10	2	1	2	0	1	1	0	11
P12277	0	0	0	0	0	0	0	0	0	0
P12956	0	1	0	0	0	0	0	0	0	0
P13010	0	0	0	0	0	0	0	0	0	0
P13489	0	0	0	0	0	0	0	0	0	0
P13639	0	0	0	0	0	0	0	0	0	0
P13645	3	1	1	0	1	0	0	1	8	2
P13667	0	0	0	0	0	0	0	0	0	0
P13674	1	0	0	0	0	0	0	0	0	0
P13693
P13797	0	0	0	0	0	0	0	0	0	0
P13804
P13995	0	0	0	0	0	0	0	0	0	0
P14174	0	0	0	0	0	0	0	0	0	1
P14314	0	0	0	0	0	0	0	0	0	0
P14324
P14618
P14625	0	0	0	0	0	0	0	0	0	0
P14678	8	6	5	0	0	0	0	1	0	0
P14854	0	0	0	0	0	0	0	0	0	2
P14866	0	2	0	0	2	0	0	0	1	0
P14868	0	0	0	0	0	0	0	0	0	0
P15170	0	1	0	0	0	0	0	0	0	0
P15311	0	1	0	0	0	0	0	0	0	0
P15531
P15880	11	8	7	7	0	0	0	3	0	0
P15924	2	1	0	1	0	2	0	0	0	2
P16104	1	2	1	0	0	0	0	0	0	0
P16152	0	0	0	0	0	0	0	0	0	0
P16401	0	0	0	0	0	0	0	0	0	0
P16403	0	0	0	0	0	0	0	0	0	0
P16435	0	0	0	0	0	0	0	0	0	0
P16615	0	0	0	0	0	0	0	0	0	0
P16989	4	1	0	0	0	3	1	0	0	0
P17174	0	0	0	0	0	0	0	0	0	0
P17480	2	1	0	0	0	0	0	0	0	1
P17612	0	0	0	0	0	0	0	0	0	1
P17812	0	1	0	0	0	0	0	0	0	0
P17844	2	1	0	1	0	0	0	0	0	0
P17858
P17931	0	0	0	0	0	0	0	0	0	0
P17980	0	0	0	0	0	0	0	0	0	0
P17987	0	0	0	0	0	0	0	0	0	0
P18077	1	1	0	0	0	0	0	0	0	0
P18085	0	0	0	0	0	0	0	0	0	0
P18124	0	0	0	0	0	0	0	0	0	0
P18206	1	0	0	0	0	0	0	0	0	1
P18583	2	5	0	2	0	0	2	0	0	0
P18621	1	0	0	0	0	0	0	0	0	0
P18669	0	0	0	0	0	0	0	0	0	0
P18754	0	0	0	0	0	0	0	0	0	0
P18858	0	1	0	0	0	0	0	0	0	1
P19105	0	0	0	0	0	0	0	0	0	1
P19338	12	11	9	1	8	0	0	10	0	3
P19525	0	2	0	0	0	0	0	0	0	0
P19623	0	0	0	0	0	0	0	0	0	0
P20042	0	0	0	0	0	0	0	0	0	0
P20073	0	0	0	0	0	0	0	0	1	0
P20290	5	2	1	2	0	0	0	2	0	0
P20340	0	0	0	0	0	0	0	0	0	0
P20618	0	0	0	0	0	0	0	0	0	0
P20674	0	0	0	0	0	0	0	0	0	0
P20700	2	2	0	1	0	0	0	0	0	0
P20810	0	0	0	0	0	0	0	0	0	2
P20839
P21266
P21281	0	0	0	0	0	0	0	0	0	0
P21291	0	0	0	0	0	0	0	0	0	0
P21333	0	0	0	0	0	0	0	0	0	1
P21796	0	0	0	0	0	0	0	0	0	0
P21964	0	0	0	0	0	0	0	0	0	0
P22087	15	10	10	5	5	0	0	9	0	0
P22102
P22234	0	0	0	0	0	0	0	0	0	0
P22314	0	0	0	0	0	0	0	0	0	0
P22392
P22626	2	3	2	0	2	0	0	1	7	0
P22695	0	0	0	0	0	0	0	0	0	0
P23246	8	5	2	1	3	1	0	5	0	1
P23284	0	0	0	0	0	0	0	0	0	0
P23381	0	0	0	0	0	0	0	0	0	0
P23396	0	0	0	0	0	0	0	0	0	0
P23526
P23528	0	0	0	0	0	0	0	0	0	0
P23588	7	4	0	0	1	1	1	1	1	0
P23919	1	0	0	0	0	1	0	0	0	0
P23921	0	0	0	0	0	0	0	0	0	0
P24534	0	0	0	0	0	0	0	0	0	0
P24539
P24666
P24752
P24941	0	0	0	0	0	0	0	0	0	0
P25205	0	0	0	0	0	0	0	0	0	0
P25325	1	1	1	0	0	0	0	0	0	0
P25398	1	0	0	0	0	0	0	0	0	0
P25685	1	2	0	0	1	0	0	0	0	0
P25705
P25786	0	0	0	0	0	0	0	0	0	0
P25787
P25788	0	1	0	0	0	0	0	0	0	0
P25789	0	0	0	0	0	0	0	0	0	0
P26038	0	1	0	0	0	0	0	0	0	0
P26196	1	0	0	0	0	0	0	0	0	1
P26232	1	1	0	0	0	1	0	0	0	1
P26358	0	1	0	0	0	0	0	0	0	1
P26368	1	0	0	0	0	0	0	0	0	0
P26373	1	1	1	0	0	0	0	0	0	0
P26447	0	0	0	0	0	0	0	0	0	0
P26583	1	1	0	0	0	0	0	0	0	0
P26599	1	0	0	0	0	0	0	0	0	0
P26639	0	1	0	0	1	0	0	0	0	0
P26640	0	0	0	0	0	0	0	0	0	0
P26641	0	0	0	0	0	0	0	0	0	0
P27105	0	0	0	0	0	0	0	0	0	0
P27144
P27348	0	1	0	0	1	0	0	0	0	0
P27635	1	1	0	0	0	0	1	0	0	0
P27694
P27695	1	0	0	0	0	0	0	0	0	0
P27708
P27797	0	0	0	0	0	0	0	0	0	1
P27816	0	2	0	0	1	0	0	0	0	3
P27824	1	0	0	0	0	0	0	0	0	0
P28066
P28070	0	0	0	0	0	0	0	0	0	0
P28072	1	0	0	0	0	0	0	0	0	0
P28074	0	0	0	0	0	0	0	0	0	0
P28288	0	0	0	0	0	0	0	0	0	0
P28331
P29401	0	0	0	0	0	0	0	0	0	0
P29692	1	0	0	0	0	0	0	0	0	0
P29992	0	0	0	0	0	0	0	0	0	0
P30040	0	0	0	0	0	0	0	0	0	0
P30041	0	0	0	0	0	0	0	0	0	0
P30044	0	0	0	0	0	0	0	0	0	0
P30046	0	0	0	0	0	0	0	0	0	0
P30048	0	0	0	0	0	0	0	0	0	0
P30049	0	0	0	0	0	0	0	0	0	0
P30050	0	1	0	0	0	0	0	0	0	1
P30084	0	0	0	0	0	0	0	0	0	0
P30085	0	1	0	0	0	0	0	0	0	0
P30086	1	0	0	0	0	0	0	0	0	0
P30101	1	1	0	0	1	0	0	0	0	0
P30153	0	0	0	0	0	0	0	0	0	0
P30405	0	1	0	0	0	0	0	0	0	0
P30419	1	0	0	0	0	0	0	1	0	0
P30536
P30740
P31040	0	0	0	0	0	0	0	0	0	0
P31153	0	0	0	0	0	0	0	0	0	0
P31327	0	0	0	0	0	0	0	0	0	0
P31689	1	0	0	0	0	0	0	1	0	0
P31930
P31937
P31939
P31942	2	1	1	0	0	0	0	1	0	0
P31943	0	0	0	0	0	0	0	0	3	0
P31946	0	0	0	0	0	0	0	0	0	0
P31948	0	0	0	0	0	0	0	0	0	1
P31949	0	0	0	0	0	0	0	0	0	0
P32119	0	0	0	0	0	0	0	0	0	0
P32322	0	0	0	0	0	0	0	0	0	0
P32754	1	1	0	1	0	0	0	0	0	0
P32969	0	0	0	0	0	0	0	0	0	0
P33176	3	0	0	0	0	1	0	2	0	3
P33316	3	2	0	0	0	0	0	0	0	1
P33991	4	1	0	1	0	3	0	0	0	0
P33992	0	0	0	0	0	0	0	0	0	0
P33993	0	0	0	0	0	0	0	0	0	0
P34896	0	0	0	0	0	0	0	0	0	0
P34897	1	0	0	0	0	0	0	0	0	0
P34932	0	0	0	0	0	0	0	0	0	3
P35221	1	1	0	1	0	0	0	0	0	0
P35232	0	0	0	0	0	0	0	0	0	0
P35237
P35241	0	1	0	0	0	0	0	0	0	1
P35249	1	0	0	0	0	0	0	0	0	0
P35268	0	0	0	0	0	0	0	0	0	0
P35270	0	0	0	0	0	0	0	0	0	0
P35520	0	1	0	0	0	0	0	0	0	0
P35527	7	4	3	0	2	0	0	5	10	1
P35573
P35579	2	1	0	0	0	1	0	0	0	3
P35606	0	0	0	0	0	0	0	0	0	0
P35613	0	0	0	0	0	0	0	0	0	1
P35637	24	13	13	4	7	1	0	19	2	2
P35658	1	3	1	0	0	0	0	1	0	1
P35659	0	0	0	0	0	0	0	0	0	1
P35998	0	0	0	0	0	0	0	0	0	0
P36507	0	0	0	0	0	0	0	0	0	0
P36542
P36578	0	0	0	0	0	0	0	0	0	0
P36776	0	0	0	0	0	0	0	0	0	0
P36871	0	0	0	0	0	0	0	0	0	0
P36915	2	2	0	0	0	0	0	0	0	0
P36952
P37108	0	1	0	0	0	0	0	0	0	0
P37198	0	1	0	0	0	0	1	0	0	1
P37802	2	1	0	0	0	0	0	0	0	0
P38117	0	1	0	0	0	0	0	0	0	0
P38159	19	10	2	1	4	1	1	6	3	0
P38606	0	0	0	0	0	0	0	0	0	1
P38646	1	0	0	0	0	0	0	0	0	0
P38919	1	0	0	0	0	0	0	0	0	0
P39019	2	2	0	0	2	0	0	1	1	0
P39023	1	1	0	0	0	0	0	0	0	0
P39656
P39748	1	1	0	0	0	0	0	0	0	0
P40121	0	0	0	0	0	0	0	0	0	0
P40227
P40261	0	0	0	0	0	0	0	0	0	0
P40429	0	0	0	0	0	0	0	0	0	0
P40616	0	0	0	0	0	0	0	0	0	0
P40763	0	0	0	0	0	0	0	0	0	0
P40925	0	0	0	0	0	0	0	0	0	0
P40926	0	0	0	0	0	0	0	0	0	0
P40937	0	0	0	0	0	0	0	0	0	0
P40939	0	0	0	0	0	0	0	0	0	0
P41091	0	0	0	0	0	0	0	0	0	0
P41223	0	0	0	0	0	0	0	0	0	0
P41240
P41250	1	0	0	0	0	0	0	0	0	0
P41252
P41567	0	1	0	0	0	0	0	0	0	1
P42126	0	0	0	0	0	0	0	0	0	0
P42166	1	4	1	0	0	0	0	0	0	2
P42167	1	5	0	0	0	0	0	0	0	1
P42224	0	0	0	0	0	0	0	0	0	0
P42285	0	0	0	0	0	0	0	0	0	0
P42704	0	0	0	0	0	0	0	0	0	0
P42765
P42766	1	0	0	0	0	0	0	0	0	0
P42771	2	2	0	1	0	0	1	0	0	0
P42785
P43034	0	0	0	0	0	0	0	0	0	0
P43243	6	5	1	0	0	0	0	0	0	0
P43246	0	0	0	0	0	0	0	0	0	0
P43487	1	0	0	0	0	0	0	0	0	0
P43490	0	0	0	0	0	0	0	0	0	0
P43686	0	0	0	0	0	0	0	0	0	0
P45880
P45974	0	0	0	0	0	0	0	0	0	0
P46013	8	7	0	0	1	0	1	2	0	9
P46060	1	0	0	0	0	0	0	0	0	0
P46063	0	0	0	0	0	0	0	0	0	1
P46087	3	4	0	0	0	0	0	0	0	2
P46379	2	2	0	0	0	0	0	1	0	1
P46459	0	1	0	0	0	0	0	0	0	0
P46776	1	1	0	0	0	0	0	0	0	0
P46777	0	0	0	0	0	0	0	0	0	0
P46778	1	0	0	0	0	1	0	0	0	0
P46779	0	0	0	0	0	0	0	0	0	0
P46781	0	2	0	0	1	0	0	0	1	0
P46782	0	0	0	0	0	0	0	0	0	0
P46783	4	3	2	1	0	0	0	1	0	0
P46940	0	0	0	0	0	0	0	0	0	1
P46977
P47756	0	0	0	0	0	0	0	0	0	0
P47813	2	1	0	0	0	1	0	0	0	0
P47897	0	0	0	0	0	0	0	0	0	0
P48047
P48444
P48556	1	1	0	0	0	0	0	1	0	0
P48643	0	0	0	0	0	0	0	0	0	0
P48651	0	0	0	0	0	0	0	0	0	0
P48729	0	0	0	0	0	0	0	0	0	0
P48960	0	0	0	0	0	0	0	0	0	0
P49005	0	0	0	0	0	0	0	0	0	0
P49207	1	1	0	0	0	0	0	0	1	0
P49257	0	0	0	0	0	0	0	0	0	0
P49327	0	0	0	0	0	0	0	0	0	0
P49368	0	0	0	0	0	0	0	0	0	0
P49411
P49458	0	0	0	0	0	0	0	0	0	0
P49588	0	0	0	0	0	0	0	0	0	0
P49589	0	1	0	0	0	0	1	0	0	1
P49591	0	0	0	0	0	0	0	0	0	1
P49643	0	1	0	0	0	0	0	0	0	0
P49720
P49721
P49736	3	4	1	0	0	2	0	0	0	0
P49748	0	1	0	0	0	0	0	0	0	0
P49755
P49773	0	0	0	0	0	0	0	0	0	0
P49792	2	2	1	0	0	0	0	0	0	0
P49902	0	0	0	0	0	0	0	0	0	1
P49915	0	0	0	0	0	0	0	0	0	0
P50213	0	0	0	0	0	0	0	0	0	0
P50395	0	0	0	0	0	0	0	0	0	0
P50402	1	1	0	0	0	0	0	0	0	0
P50416
P50454	0	0	0	0	0	0	0	0	0	0
P50502	1	0	0	0	0	0	0	0	0	1
P50552	1	1	0	0	0	0	0	0	0	0
P50570	1	1	0	0	0	0	0	0	0	0
P50579	1	1	0	0	0	0	0	0	0	0
P50897
P50914	0	0	0	0	0	0	0	0	0	0
P50990	0	0	0	0	0	0	0	0	0	1
P50991	1	1	1	0	1	0	0	0	0	0
P50995	1	0	0	0	0	0	0	0	0	0
P51148	2	2	1	0	0	0	0	1	0	1
P51149	0	0	0	0	0	0	0	0	0	0
P51398
P51532	6	6	1	1	1	0	1	0	0	3
P51571
P51610	0	1	0	0	0	0	0	0	0	0
P51648
P51659
P51665	0	0	0	0	0	0	0	0	0	0
P51858	1	1	1	0	0	0	0	0	0	0
P51970	0	0	0	0	0	0	0	0	0	0
P51991	7	5	2	0	2	1	1	4	7	0
P52209
P52272	1	1	0	0	0	0	0	1	0	1
P52292	0	0	0	0	0	0	0	0	0	1
P52565	1	1	0	0	0	0	0	0	0	0
P52597	1	1	0	0	0	0	0	0	0	2
P52701	1	1	0	0	1	0	0	0	0	1
P52815
P52907	0	0	0	0	0	0	0	0	0	0
P52943	0	0	0	0	0	0	0	0	0	0
P52948	0	1	0	0	0	0	0	0	0	2
P53004	0	1	0	0	0	0	0	0	0	0
P53041	0	0	0	0	0	0	0	0	0	0
P53396
P53597	0	0	0	0	0	0	0	0	0	0
P53618	0	0	0	0	0	0	0	0	0	0
P53621
P53634
P53992	3	0	0	0	0	0	0	0	2	2
P53999	0	1	0	0	0	0	0	0	0	0
P54136
P54577	0	0	0	0	0	0	0	0	0	0
P54578	0	1	0	0	0	0	0	0	0	0
P54709	0	1	0	0	0	0	0	0	0	0
P54819	0	0	0	0	0	0	0	0	0	0
P54886
P55010	0	0	0	0	0	0	0	0	0	0
P55060	0	0	0	0	0	0	0	0	0	0
P55072	1	0	0	0	0	0	0	0	0	0
P55084
P55209	1	1	1	0	0	0	0	0	0	2
P55265	6	2	0	2	0	0	0	0	0	0
P55735	0	0	0	0	0	0	0	0	0	1
P55769	1	1	0	0	0	0	0	0	0	0
P55786
P55795	0	0	0	0	0	0	0	0	3	0
P55809
P55884	1	1	0	0	0	0	0	1	0	0
P56134	1	0	0	0	0	0	0	0	0	0
P56192	0	0	0	0	0	0	0	0	0	0
P56537
P56556	0	1	0	0	0	0	0	0	0	0
P57088
P57678	0	0	0	0	0	0	0	0	0	0
P57740	0	0	0	0	0	0	0	0	0	0
P58107	10	10	5	0	0	0	0	0	0	0
P59998
P60174	0	0	0	0	0	0	0	0	0	0
P60228	0	0	0	0	0	0	0	0	0	1
P60660	0	0	0	0	0	0	0	0	0	0
P60842	0	0	0	0	0	0	0	0	0	0
P60866	1	0	0	0	0	0	0	0	0	0
P60891
P60900
P60903	0	0	0	0	0	0	0	0	0	0
P60953	0	0	0	0	0	0	0	0	0	0
P60981
P61019	0	0	0	0	0	0	0	0	0	0
P61026	0	0	0	0	0	0	0	0	0	0
P61081	0	0	0	0	0	0	0	0	0	0
P61088	0	0	0	0	0	0	0	0	0	0
P61106	0	1	0	0	1	0	0	0	0	1
P61158
P61160
P61163	0	0	0	0	0	0	0	0	0	0
P61201	0	0	0	0	0	0	0	0	0	0
P61221	0	0	0	0	0	0	0	0	0	0
P61224	0	0	0	0	0	0	0	0	0	0
P61247	0	0	0	0	0	0	0	0	0	0
P61254	1	0	0	0	0	0	0	0	0	0
P61313	0	0	0	0	0	0	0	0	0	0
P61353	0	2	0	0	0	0	0	0	0	0
P61513	0	0	0	0	0	0	0	0	0	0
P61586	1	0	0	0	0	1	0	0	0	0
P61604	0	0	0	0	0	0	0	0	1	0
P61619
P61960	0	0	0	0	0	0	0	0	0	0
P61978	6	5	3	1	3	2	0	3	0	2
P61981	0	0	0	0	0	0	0	0	0	0
P62081	0	1	0	0	1	0	0	0	0	0
P62136	0	2	0	0	1	0	0	0	0	0
P62140	0	1	0	0	0	0	0	0	1	0
P62191	1	0	0	0	0	0	0	0	0	0
P62195	0	0	0	0	0	0	0	0	0	1
P62241	1	3	0	0	0	0	0	1	0	0
P62244
P62249	1	2	0	0	0	0	0	0	0	0
P62258	0	0	0	0	0	0	0	0	0	1
P62263	1	3	0	1	1	1	2	0	0	0
P62266	1	1	0	0	0	0	0	0	0	0
P62269	3	2	0	1	0	1	1	0	0	1
P62273	0	0	0	0	0	0	0	0	0	0
P62277	0	1	0	0	0	0	0	0	0	0
P62280	0	0	0	0	0	0	0	0	0	1
P62306	1	0	0	0	0	0	0	0	0	0
P62314	10	9	9	8	0	0	0	1	0	0
P62316	1	1	0	0	0	0	0	0	0	0
P62318	6	5	4	2	0	0	0	0	0	0
P62328	0	0	0	0	0	0	0	0	0	0
P62333	0	1	0	0	0	0	0	0	0	0
P62424	0	0	0	0	0	0	0	0	0	0
P62495	0	0	0	0	0	0	0	0	0	0
P62633	6	5	4	2	1	0	0	2	0	0
P62701	2	0	0	0	0	0	0	0	0	0
P62750	0	0	0	0	0	0	0	0	0	0
P62753	1	1	0	0	0	0	0	0	0	0
P62805	3	2	1	0	0	1	0	1	0	0
P62820	0	0	0	0	0	0	0	0	0	0
P62826	0	0	0	0	0	0	0	0	0	0
P62829	2	2	1	1	0	0	0	1	0	0
P62837	0	0	0	0	0	0	0	0	0	0
P62841	2	0	0	0	0	0	0	0	0	0
P62847	1	0	0	0	0	0	0	0	0	0
P62851	1	0	0	0	0	0	0	0	0	0
P62854	1	2	1	0	0	0	0	0	0	0
P62857	0	1	0	0	0	0	0	0	0	0
P62861	1	1	0	0	0	0	0	0	0	0
P62879	0	0	0	0	0	0	0	0	0	0
P62888	0	0	0	0	0	0	0	0	0	0
P62899	0	1	0	0	0	0	0	0	0	0
P62906	0	0	0	0	0	0	0	0	0	0
P62910	1	0	0	0	0	0	0	0	0	0
P62913	0	0	0	0	0	0	0	0	0	0
P62917	1	2	0	0	0	0	0	0	0	0
P62937	0	0	0	0	0	0	0	0	0	0
P62979	1	1	0	0	0	0	0	1	0	0
P62995	5	2	0	0	0	0	1	2	0	1
P63000
P63010	0	0	0	0	0	0	0	0	0	0
P63092	0	0	0	0	0	0	0	0	0	0
P63104	0	0	0	0	0	0	0	0	0	0
P63151	0	0	0	0	0	0	0	0	0	0
P63167	0	1	0	0	0	0	0	0	0	0
P63173	0	0	0	0	0	0	0	0	0	0
P63220	0	1	0	0	0	0	0	0	0	1
P63241	0	0	0	0	0	0	0	0	0	0
P63244
P63261	0	0	0	0	0	0	0	0	0	0
P63279	0	0	0	0	0	0	0	0	0	1
P63313	0	0	0	0	0	0	0	0	0	0
P67775	1	0	0	0	0	1	0	0	0	0
P67809	3	2	0	0	0	2	1	0	0	3
P67812
P67870
P67936	1	0	0	0	0	0	0	0	0	0
P68032
P68036	0	0	0	0	0	0	0	0	0	0
P68104	0	1	0	0	0	0	0	0	0	0
P68363	0	0	0	0	0	0	0	0	0	0
P68366	0	0	0	0	0	0	0	0	0	0
P68371	0	0	0	0	0	0	0	0	0	0
P68400	0	0	0	0	0	0	0	0	0	0
P68431	1	0	0	0	0	0	0	0	0	0
P69849	0	0	0	0	0	0	0	0	0	0
P78344	2	0	0	0	0	0	0	0	0	1
P78346	0	0	0	0	0	0	0	0	0	0
P78347	0	0	0	0	0	0	0	0	0	0
P78371
P78406	0	0	0	0	0	0	0	0	0	0
P78527
P80723	0	0	0	0	0	0	0	0	0	0
P82650	0	0	0	0	0	0	0	0	0	0
P82979	1	0	0	0	0	0	0	0	0	0
P83731	0	1	0	0	0	0	1	0	0	0
P83881	0	0	0	0	0	0	0	0	1	0
P84077
P84085
P84090	0	1	0	0	0	0	0	0	0	0
P84098	0	0	0	0	0	0	0	0	0	0
P84103	1	2	0	0	0	0	1	0	0	0
P84243	1	0	0	0	0	0	0	0	0	0
P98179	5	6	1	1	0	0	0	2	0	0
P99999	0	1	0	0	0	0	0	0	0	0
Q00325	0	0	0	0	0	0	0	0	0	0
Q00341	1	0	0	0	0	0	0	0	0	0
Q00610	0	0	0	0	0	0	0	0	0	0
Q00688	1	0	0	0	0	0	0	0	0	0
Q00796	0	0	0	0	0	0	0	0	0	0
Q00839	18	7	4	2	2	1	0	7	0	2
Q01081	2	4	1	1	1	0	1	1	0	0
Q01082	0	0	0	0	0	0	0	0	0	1
Q01105	0	0	0	0	0	0	0	0	0	2
Q01130	2	5	0	0	0	1	1	0	1	0
Q01518	1	1	0	0	0	0	0	0	0	1
Q01650	0	0	0	0	0	0	0	0	0	0
Q01813	0	0	0	0	0	0	0	0	0	0
Q01844	30	14	11	3	9	2	2	22	0	2
Q02218
Q02543
Q02790	0	0	0	0	0	0	0	0	0	0
Q02809
Q02878	1	1	0	0	0	0	0	0	0	0
Q02978	0	0	0	0	0	0	0	0	0	0
Q03252	2	5	0	0	0	0	1	0	0	1
Q03701	0	0	0	0	0	0	0	0	0	2
Q04637	11	4	0	1	1	1	0	3	0	1
Q04837
Q05519	1	1	0	1	0	0	1	0	0	0
Q06124	0	0	0	0	0	0	0	0	0	0
Q06210
Q06265	0	0	0	0	0	0	0	0	0	0
Q06830	0	0	0	0	0	0	0	0	0	0
Q07020	2	4	0	1	0	0	1	0	0	0
Q07021	1	0	0	0	0	0	0	0	0	0
Q07065	2	2	0	0	0	0	0	1	0	2
Q07666	14	5	3	3	0	0	0	2	0	0
Q07866	0	2	0	0	0	0	1	0	1	0
Q07955	6	5	2	1	0	1	0	2	0	0
Q08211	8	2	2	0	1	0	0	3	2	0
Q08379	1	1	0	0	0	0	0	0	0	7
Q08945	3	1	1	0	1	0	0	0	0	0
Q08J23	2	2	0	1	0	0	2	0	0	0
Q09028	0	0	0	0	0	0	0	0	0	0
Q09161	0	0	0	0	0	0	0	0	0	0
Q09666	9	3	0	0	0	0	0	0	0	1
Q10471	0	1	0	0	0	0	0	0	0	0
Q10567	0	0	0	0	0	0	0	0	0	0
Q12769	1	1	0	0	0	1	1	0	0	0
Q12792	2	0	0	0	0	0	0	0	0	0
Q12797	2	1	0	0	0	0	0	0	0	1
Q12849	1	2	0	0	0	0	1	0	0	0
Q12874	0	0	0	0	0	0	0	0	0	0
Q12904	0	0	0	0	0	0	0	0	0	1
Q12905	5	3	2	2	1	0	0	2	0	0
Q12906	9	8	5	5	1	1	0	2	2	2
Q12907
Q12931	0	0	0	0	0	0	0	0	0	0
Q12965	1	2	0	0	1	0	0	0	0	3
Q13011	0	0	0	0	0	0	0	0	0	0
Q13045
Q13057	0	0	0	0	0	0	0	0	0	0
Q13084	0	0	0	0	0	0	0	0	0	0
Q13098	0	0	0	0	0	0	0	0	0	1
Q13126	0	1	0	0	0	0	0	0	0	0
Q13148	0	0	0	0	0	0	0	0	0	2
Q13151	5	5	3	1	4	0	0	4	6	1
Q13155
Q13162	0	0	0	0	0	0	0	0	0	0
Q13177	0	0	0	0	0	0	0	0	0	0
Q13185	2	0	0	0	0	0	0	0	0	1
Q13200	0	1	0	0	1	0	0	0	0	0
Q13247	2	6	0	0	0	0	0	0	0	0
Q13263	1	0	0	0	0	0	0	0	0	0
Q13283	7	1	1	0	0	0	0	2	0	0
Q13310	0	0	0	0	0	0	0	0	0	0
Q13347
Q13418	0	0	0	0	0	0	0	0	0	0
Q13428	1	1	0	0	0	0	0	0	0	1
Q13435	6	0	0	0	0	0	0	1	0	0
Q13523	4	4	0	1	1	0	3	1	0	2
Q13546	0	0	0	0	0	0	0	0	0	2
Q13555	0	0	0	0	0	0	0	0	0	0
Q13564
Q13595	3	5	0	0	1	0	2	0	0	0
Q13610	0	2	0	0	0	0	1	0	0	0
Q13617	0	0	0	0	0	0	0	0	0	0
Q13619	0	1	0	0	0	0	0	0	0	0
Q13724	3	2	1	0	0	0	1	2	0	0
Q13769	2	1	0	0	0	0	0	1	0	0
Q13813	0	1	0	0	0	0	0	0	0	1
Q13838	0	0	0	0	0	0	0	0	0	0
Q13868	0	1	0	0	0	0	0	0	0	0
Q13895	3	1	1	1	0	1	0	0	0	0
Q13907
Q14019	0	0	0	0	0	0	0	0	0	1
Q14103	6	3	1	1	0	2	0	3	2	2
Q14134	0	1	0	0	0	0	0	0	0	1
Q14152	29	1	0	0	0	17	0	1	0	0
Q14157	13	10	5	6	1	4	2	3	0	4
Q14203	4	1	0	0	0	0	0	0	0	1
Q14204	0	0	0	0	0	0	0	0	0	1
Q14232	0	0	0	0	0	0	0	0	0	0
Q14258	0	1	0	0	0	0	0	0	0	0
Q14444	11	1	1	1	0	0	0	3	0	5
Q14498	2	1	0	1	0	0	0	0	0	0
Q14558
Q14566	0	0	0	0	0	0	0	0	0	0
Q14683	0	1	0	0	0	0	0	0	0	2
Q14697	0	0	0	0	0	0	0	0	0	0
Q14738	0	0	0	0	0	0	0	0	0	0
Q14739	2	2	0	1	0	1	0	0	0	0
Q14839	0	1	0	0	0	0	0	0	0	1
Q14847	0	0	0	0	0	0	0	0	1	0
Q14974	0	1	0	0	0	0	1	0	0	0
Q14978	3	0	0	0	0	0	0	1	0	2
Q14980	8	9	0	2	0	1	0	0	0	3
Q14C86	1	0	0	0	0	0	0	0	0	1
Q14CX7	1	0	0	0	0	0	0	0	0	0
Q15003	1	0	0	0	0	0	0	0	0	3
Q15008	1	0	0	0	0	0	0	0	0	0
Q15019	0	0	0	0	0	0	0	0	0	0
Q15020	5	1	0	0	0	0	0	0	0	1
Q15021	2	0	0	0	0	1	0	0	0	0
Q15029	0	1	0	0	0	0	0	0	0	0
Q15046	0	0	0	0	0	0	0	0	0	0
Q15056	6	3	2	0	2	0	0	2	0	0
Q15084	1	2	1	0	0	0	0	0	0	0
Q15125	0	0	0	0	0	0	0	0	0	0
Q15149	5	5	0	0	0	2	1	1	0	0
Q15165
Q15181	0	0	0	0	0	0	0	0	0	0
Q15185	0	0	0	0	0	0	0	0	0	0
Q15233	1	0	0	0	0	0	0	0	0	2
Q15287	1	3	0	1	0	0	1	0	0	0
Q15363
Q15365
Q15366
Q15369	0	0	0	0	0	0	0	0	1	0
Q15393	0	0	0	0	0	0	0	0	0	0
Q15397	0	1	0	0	0	0	0	0	0	0
Q15404	1	1	0	0	0	0	0	0	0	0
Q15424	7	9	2	1	0	0	1	1	0	0
Q15427	5	0	0	0	0	0	0	0	0	1
Q15428	0	0	0	0	0	0	0	0	0	0
Q15436
Q15437
Q15459	0	1	0	0	0	0	0	0	0	1
Q15637	2	1	0	0	0	0	0	0	0	3
Q15645	0	0	0	0	0	0	0	0	0	0
Q15691	0	0	0	0	0	0	0	0	0	0
Q15717
Q15738	0	0	0	0	0	0	0	0	0	1
Q15758	1	0	0	0	0	0	0	0	0	0
Q15785	0	1	0	0	0	0	0	0	0	1
Q15843	1	0	0	0	0	0	0	1	0	0
Q15907	0	0	0	0	0	0	0	0	0	1
Q15942	1	1	0	0	0	0	0	0	0	2
Q16181	0	0	0	0	0	0	0	0	0	1
Q16401	0	0	0	0	0	0	0	0	0	0
Q16513	2	1	0	1	0	0	0	0	0	0
Q16531
Q16543	1	0	0	0	0	0	0	0	0	0
Q16555	0	1	0	0	1	0	0	0	0	0
Q16576	0	0	0	0	0	0	0	0	0	0
Q16629	3	3	0	2	0	0	2	0	1	0
Q16630	5	5	2	2	1	0	0	0	1	1
Q16658
Q16718	0	0	0	0	0	0	0	0	0	0
Q16740	0	0	0	0	0	0	0	0	0	0
Q16778	0	0	0	0	0	0	0	0	0	0
Q16795
Q16836	0	0	0	0	0	0	0	0	0	0
Q16851	0	0	0	0	0	0	0	0	0	0
Q16881	0	1	0	0	0	0	1	0	0	0
Q16891	0	0	0	0	0	0	0	0	0	1
Q1KMD3	7	2	0	0	0	3	0	1	1	1
Q27J81	7	3	1	2	0	0	0	0	0	1
Q29RF7	2	3	0	1	0	1	1	0	0	0
Q2NL82	3	4	1	1	1	0	0	0	0	1
Q3LXA3	0	1	0	0	0	0	0	0	0	0
Q3ZCQ8	2	0	0	0	0	0	0	0	0	1
Q49A26	3	2	0	1	0	0	0	0	0	0
Q53EL6	3	5	2	1	1	0	0	0	0	0
Q53GQ0
Q53GS9	4	3	0	0	0	0	0	0	0	0
Q53H96	0	1	0	0	0	0	0	0	0	0
Q58FF6	0	0	0	0	0	0	0	0	0	0
Q58FF8	0	0	0	0	0	0	0	0	0	0
Q58FG1	0	0	0	0	0	0	0	0	0	0
Q59GN2	0	0	0	0	0	0	0	0	0	1
Q5JTH9	3	6	1	1	0	1	0	0	0	0
Q5SRE5	1	1	0	0	0	1	0	0	0	0
Q5SSJ5	4	0	0	0	0	1	0	0	0	0
Q5T4S7	0	1	0	0	0	0	0	0	0	0
Q5T6F2	13	10	7	5	1	0	0	1	0	3
Q5T8P6	12	10	8	7	0	1	0	0	0	1
Q5VYK3	0	0	0	0	0	0	0	0	0	0
Q68E01	0	1	0	0	1	0	0	0	0	0
Q6DD88	1	1	0	0	0	0	0	0	0	0
Q6DKI1	0	0	0	0	0	0	0	0	0	0
Q6NUK1
Q6NUQ4	2	5	1	0	2	0	1	1	0	2
Q6NZI2	3	0	0	0	0	1	0	0	0	0
Q6P2E9	3	0	0	0	0	0	0	1	0	0
Q6P2Q9	1	0	0	0	0	0	0	0	0	0
Q6P5R6	0	0	0	0	0	0	0	0	0	0
Q6PKG0	11	11	7	7	0	0	1	3	0	0
Q6UB35	0	2	0	0	2	0	0	0	0	1
Q6UN15	1	5	0	0	1	0	1	0	1	0
Q6UXN9
Q6Y7W6	10	11	5	4	1	0	0	2	0	3
Q6YHK3
Q6YN16
Q71DI3	1	0	0	0	0	0	0	0	0	0
Q71UI9	1	2	0	0	0	0	0	0	0	0
Q71UM5	0	0	0	0	0	0	0	0	0	0
Q7KZF4	3	0	0	0	0	0	0	1	0	0
Q7L014	5	4	0	2	0	0	1	1	0	3
Q7L0Y3	0	0	0	0	0	0	0	0	0	0
Q7L1Q6	0	0	0	0	0	0	0	0	0	0
Q7L2E3	2	2	0	0	0	0	0	0	0	0
Q7L2H7	0	0	0	0	0	0	0	0	0	0
Q7L576	0	0	0	0	0	0	0	0	0	0
Q7L5N1	0	0	0	0	0	0	0	0	0	0
Q7Z2W4	0	0	0	0	0	0	0	0	0	0
Q7Z3B4	0	0	0	0	0	0	0	0	0	0
Q7Z6Z7	1	2	0	0	0	0	0	0	0	3
Q86TC9	1	0	0	0	0	0	0	0	0	4
Q86UP2	0	0	0	0	0	0	0	0	0	9
Q86V81	14	11	6	4	4	1	0	6	0	0
Q86VP6	0	0	0	0	0	0	0	0	0	0
Q86W42
Q86Y56	0	1	0	0	0	0	1	0	0	0
Q8IVT2	7	3	0	1	0	0	0	0	0	1
Q8IWX8	4	2	0	1	0	0	1	0	0	1
Q8IXB1	0	0	0	0	0	0	0	0	0	0
Q8IXT5	2	3	0	0	0	0	0	0	0	0
Q8IYB3	3	3	0	1	0	1	2	0	0	1
Q8IZ83	0	0	0	0	0	0	0	0	0	0
Q8IZL8	1	1	0	0	1	0	0	0	0	0
Q8N163	1	1	0	0	1	0	0	0	0	2
Q8N1F7	1	0	0	0	0	0	0	0	0	0
Q8N1G4	1	3	1	0	0	0	0	1	0	0
Q8N3U4	0	1	0	0	0	0	0	0	0	1
Q8N684	1	1	0	0	0	0	0	1	0	1
Q8N766
Q8N7H5	1	0	0	0	0	0	0	0	0	1
Q8N884	2	0	0	0	0	0	0	0	0	0
Q8NBJ5	1	1	0	0	0	1	1	0	0	0
Q8NBJ7	0	1	0	0	0	0	0	0	0	0
Q8NC51	15	14	11	4	5	0	1	7	0	1
Q8NCA5	14	16	12	0	14	0	0	12	2	1
Q8NE71	1	1	0	0	0	0	1	1	0	1
Q8NE86	0	0	0	0	0	0	0	0	0	0
Q8NF37	1	1	0	0	0	0	0	0	0	0
Q8TB61	1	0	0	0	0	0	0	0	0	0
Q8TC12
Q8TCJ2	1	0	0	0	0	0	0	0	0	0
Q8TCS8	0	1	0	0	0	0	0	0	0	0
Q8TDD1	10	7	1	1	0	3	0	2	0	2
Q8TDN6	1	0	0	0	0	1	0	1	0	0
Q8TEM1	0	0	0	0	0	0	0	0	0	0
Q8TEQ6	0	0	0	0	0	0	0	0	0	1
Q8TEX9
Q8WU90	0	2	0	0	1	0	0	0	0	1
Q8WUM0	2	1	0	0	0	1	1	0	0	0
Q8WUM4	0	0	0	0	0	0	0	0	0	0
Q8WVY7	0	0	0	0	0	0	0	0	0	0
Q8WWI1	3	1	0	0	1	1	0	1	0	2
Q8WWM7	8	6	0	0	1	1	0	2	0	2
Q8WX93	2	1	0	0	0	0	0	0	0	2
Q92499
Q92522	2	2	0	0	0	1	0	0	0	2
Q92552	0	0	0	0	0	0	0	0	0	1
Q92598	0	0	0	0	0	0	0	0	0	1
Q92600	1	0	0	0	0	0	0	0	0	0
Q92616	0	0	0	0	0	0	0	0	0	0
Q92620	3	4	1	2	0	0	1	0	0	1
Q92621
Q92688	0	0	0	0	0	0	0	0	0	0
Q92769	0	1	0	0	1	0	1	0	0	0
Q92804	31	12	9	5	5	1	1	22	22	3
Q92820
Q92841	4	3	0	0	1	0	1	3	0	0
Q92878	0	1	0	0	0	0	0	0	0	3
Q92890	1	2	0	0	1	0	0	0	0	0
Q92900	2	3	2	0	1	0	0	1	0	1
Q92905	0	0	0	0	0	0	0	0	0	0
Q92917	2	2	0	0	0	0	0	0	0	2
Q92922	0	1	0	0	0	0	0	0	0	2
Q92945	6	3	3	1	0	0	0	4	0	0
Q92973	0	0	0	0	0	0	0	0	0	0
Q92979	0	1	0	0	1	0	1	0	0	0
Q93008	1	0	0	0	0	0	0	0	0	2
Q93009	0	0	0	0	0	0	0	0	0	1
Q969G3	0	0	0	0	0	0	0	0	0	1
Q969S3	1	1	1	0	1	0	0	0	0	0
Q969U7
Q969Z0	0	0	0	0	0	0	0	0	0	0
Q96A33	0	0	0	0	0	0	0	0	0	0
Q96A72	0	1	0	0	0	0	0	0	0	0
Q96AC1
Q96AE4	5	5	4	2	1	0	0	1	1	2
Q96AG4	0	0	0	0	0	0	0	0	0	0
Q96CW1
Q96D46	0	0	0	0	0	0	0	0	0	0
Q96DG6
Q96DI7	0	0	0	0	0	0	0	0	0	0
Q96DT7	5	3	2	1	0	0	0	2	0	1
Q96E11	0	0	0	0	0	0	0	0	0	0
Q96EK6	0	0	0	0	0	0	0	0	0	1
Q96EP5	3	3	2	0	0	0	0	0	1	1
Q96EY1	0	0	0	0	0	0	0	0	0	0
Q96EY7	0	0	0	0	0	0	0	0	0	0
Q96G23	0	0	0	0	0	0	0	0	0	0
Q96GQ7	4	1	0	0	0	2	1	2	0	0
Q96HC4	1	2	0	0	0	1	0	0	0	2
Q96HS1	0	0	0	0	0	0	0	0	0	0
Q96KA5	0	0	0	0	0	0	0	0	0	0
Q96KR1	2	1	0	0	0	0	1	0	1	4
Q96MT7	0	1	0	0	0	0	0	0	0	1
Q96N66	0	0	0	0	0	0	0	0	0	0
Q96P70	0	0	0	0	0	0	0	0	0	0
Q96PK6	2	1	0	0	0	0	0	0	2	0
Q96QK1	0	0	0	0	0	0	0	0	0	0
Q96S52	0	0	0	0	0	0	0	0	0	0
Q96T37	10	5	0	1	1	1	1	3	0	0
Q96T76	1	0	0	0	0	0	0	0	0	0
Q96TA1	1	0	0	0	0	0	0	0	0	0
Q99436	0	0	0	0	0	0	0	0	0	0
Q99439	0	1	0	0	0	0	0	0	0	0
Q99460	0	0	0	0	0	0	0	0	0	0
Q99471	0	0	0	0	0	0	0	0	0	0
Q99497	1	0	0	0	0	0	0	0	0	0
Q99575	3	3	1	0	1	0	1	1	0	0
Q99613	2	0	0	0	0	1	0	2	1	1
Q99623	1	0	0	0	0	0	0	0	0	2
Q99627	0	0	0	0	0	0	0	0	0	0
Q99714
Q99729	8	4	2	1	1	2	0	1	1	2
Q99733	1	1	1	0	0	0	0	0	0	1
Q99829	0	0	0	0	0	0	0	0	0	1
Q99832	3	4	3	3	0	0	0	0	0	0
Q99848	2	1	1	0	0	0	0	0	0	1
Q99873	0	0	0	0	0	0	0	0	0	0
Q99878	1	2	1	0	0	0	0	0	0	0
Q99880	0	0	0	0	0	0	0	0	0	0
Q9BPW8
Q9BPX3	2	0	0	0	0	0	0	0	0	1
Q9BQ52	1	2	0	0	0	0	0	0	0	0
Q9BQ67	1	2	1	0	0	0	1	0	0	0
Q9BQA1	0	0	0	0	0	0	0	0	0	0
Q9BQE3	0	0	0	0	0	0	0	0	0	0
Q9BQG0	1	1	0	0	0	0	0	0	0	0
Q9BSJ8	1	1	0	0	0	0	0	0	0	1
Q9BT73	0	0	0	0	0	0	0	0	0	0
Q9BT78	0	0	0	0	0	0	0	0	0	0
Q9BTE3	0	0	0	0	0	0	0	0	0	0
Q9BTW9	0	1	0	0	0	0	0	0	0	0
Q9BUF5	0	0	0	0	0	0	0	0	0	0
Q9BUJ2	13	5	2	3	0	2	0	5	1	4
Q9BUQ8	3	4	2	0	0	1	0	1	0	0
Q9BV20	0	0	0	0	0	0	0	0	0	0
Q9BV38	0	0	0	0	0	0	0	0	0	0
Q9BVA1	0	0	0	0	0	0	0	0	0	0
Q9BVK6
Q9BVP2	1	0	0	0	0	0	0	0	0	1
Q9BW27	0	0	0	0	0	0	0	0	0	0
Q9BWD1
Q9BWJ5	0	0	0	0	0	0	0	0	0	0
Q9BWM7
Q9BXJ9	0	0	0	0	0	0	0	0	0	0
Q9BXP5	6	4	1	1	0	1	0	0	0	0
Q9BXS5
Q9BXW7
Q9BY32
Q9BY44	1	0	0	0	0	0	0	0	0	1
Q9BY77	1	1	0	0	0	0	0	0	0	0
Q9BYG3	0	0	0	0	0	0	0	0	0	0
Q9BZK7
Q9BZZ5	6	2	1	1	1	0	0	1	0	0
Q9GZS3
Q9GZT3	2	0	0	0	0	0	0	0	0	0
Q9GZZ1	0	0	0	0	0	0	0	0	0	1
Q9H074	3	3	2	1	0	0	0	1	0	1
Q9H0A0	1	0	0	0	0	0	0	0	0	0
Q9H0D6	3	3	0	0	1	0	0	1	0	2
Q9H0S4	0	1	0	0	0	0	0	0	0	0
Q9H0U4	0	0	0	0	0	0	0	0	0	0
Q9H2G2	0	0	0	0	0	0	0	0	0	3
Q9H2H9	0	0	0	0	0	0	0	0	0	1
Q9H3U1	0	0	0	0	0	0	0	0	1	0
Q9H4A6	0	0	0	0	0	0	0	0	0	0
Q9H4G0	1	1	0	0	0	0	0	0	0	0
Q9H4M9	0	0	0	0	0	0	0	0	0	0
Q9H6R4	1	0	0	0	0	0	0	0	0	0
Q9H8H3
Q9H910	0	1	0	0	1	0	0	0	0	1
Q9H9A6	0	1	0	0	1	0	0	0	0	0
Q9H9B4	0	0	0	0	0	0	0	0	0	0
Q9HAV4	0	0	0	0	0	0	0	0	0	0
Q9HAV7	0	1	0	0	0	0	0	0	0	1
Q9HB71	0	0	0	0	0	0	0	0	0	0
Q9HC10	1	2	0	0	0	0	0	0	0	0
Q9HCC0
Q9NP72	0	0	0	0	0	0	0	0	0	0
Q9NP92	0	0	0	0	0	0	0	0	0	0
Q9NP97	0	0	0	0	0	0	0	0	0	2
Q9NPA0	0	0	0	0	0	0	0	0	0	0
Q9NPJ3
Q9NQC3	2	0	0	0	0	1	0	0	0	0
Q9NR30	6	0	0	0	0	0	0	0	1	2
Q9NR31
Q9NR56
Q9NRG9	1	0	0	0	0	0	0	0	0	0
Q9NRH3	0	0	0	0	0	0	0	0	0	0
Q9NRN7	0	0	0	0	0	0	0	0	0	0
Q9NRW3	0	0	0	0	0	0	0	0	0	0
Q9NRX2	0	0	0	0	0	0	0	0	0	0
Q9NS69	0	0	0	0	0	0	0	0	0	0
Q9NSD9
Q9NSE4	1	1	0	0	0	0	0	0	0	0
Q9NTJ3	0	1	0	0	0	0	0	0	0	0
Q9NTK5	0	2	0	0	0	0	0	0	0	0
Q9NUQ8	0	0	0	0	0	0	0	0	0	0
Q9NUQ9	0	0	0	0	0	0	0	0	0	0
Q9NUU7	0	0	0	0	0	0	0	0	0	0
Q9NVH1	1	0	0	0	0	0	0	0	0	0
Q9NVI7	2	1	1	0	0	0	0	0	0	0
Q9NVP1	1	0	0	0	0	0	0	1	0	2
Q9NXF1	0	0	0	0	0	0	0	0	0	1
Q9NXG2	0	0	0	0	0	0	0	0	0	1
Q9NYF8	19	13	6	10	1	2	0	1	0	2
Q9NYL9	0	0	0	0	0	0	0	0	0	0
Q9NYU2	0	0	0	0	0	0	0	0	0	0
Q9NZ01
Q9NZL4	2	0	0	0	0	0	0	0	0	0
Q9NZM1	1	0	0	0	0	0	0	0	0	1
Q9NZN4	0	1	0	0	0	0	0	0	0	0
Q9P015	5	3	1	2	0	1	1	0	0	0
Q9P035	0	0	0	0	0	0	0	0	0	0
Q9P0J0	1	0	0	0	0	1	0	0	0	0
Q9P0L0	0	0	0	0	0	0	0	0	0	0
Q9P258	1	1	0	0	0	0	0	1	0	0
Q9P287	0	0	0	0	0	0	0	0	0	0
Q9P289	0	0	0	0	0	0	0	0	0	2
Q9P2E9	0	4	0	0	0	0	0	0	0	28
Q9P2I0	0	1	0	0	0	0	0	0	0	0
Q9P2J5	0	0	0	0	0	0	0	0	0	0
Q9UBB4	0	0	0	0	0	0	0	0	0	1
Q9UBD5	0	0	0	0	0	0	0	0	0	0
Q9UBE0	0	0	0	0	0	0	0	0	0	0
Q9UBM7	0	0	0	0	0	0	0	0	0	0
Q9UBQ0
Q9UBQ5	0	0	0	0	0	0	0	0	0	0
Q9UBR2
Q9UBT2	0	0	0	0	0	0	0	0	0	0
Q9UBW8	1	0	0	0	0	0	0	0	0	1
Q9UBX3
Q9UDY4	1	0	0	0	0	0	0	0	0	0
Q9UG63	0	1	0	0	0	0	0	0	0	0
Q9UGI8	0	0	0	0	0	0	0	0	0	0
Q9UGP8	0	0	0	0	0	0	0	0	0	1
Q9UHB6	0	4	0	0	1	0	0	0	0	2
Q9UHB9	2	1	1	0	1	0	0	0	0	0
Q9UHD1	1	1	0	0	0	0	0	0	0	0
Q9UHD8	0	1	0	0	0	0	0	0	0	0
Q9UHI6	0	0	0	0	0	0	0	0	0	1
Q9UHX1	0	2	0	0	0	0	0	0	0	0
Q9UI26	0	0	0	0	0	0	0	0	0	0
Q9UI30	1	1	0	0	0	0	0	0	0	0
Q9UIA9	0	0	0	0	0	0	0	0	0	0
Q9UIG0	3	6	0	2	0	0	3	0	0	2
Q9UII2	2	0	0	0	0	0	0	0	0	0
Q9UJS0	0	0	0	0	0	0	0	0	0	0
Q9UJZ1	0	0	0	0	0	0	0	0	0	0
Q9UKD2	0	1	0	0	0	0	0	0	0	1
Q9UKS6	1	2	0	0	1	0	0	0	0	0
Q9UKV3	12	9	1	2	2	0	2	2	0	1
Q9UL25	1	1	0	0	0	1	0	0	0	0
Q9UL46	0	0	0	0	0	0	0	0	0	1
Q9ULC4
Q9ULV4	0	0	0	0	0	0	0	0	0	1
Q9UM00	0	0	0	0	0	0	0	0	0	0
Q9UMS4	0	0	0	0	0	0	0	0	0	0
Q9UN86	9	4	3	0	0	0	0	2	0	1
Q9UNE7	0	2	0	0	0	0	0	0	0	0
Q9UNF0	0	1	0	0	0	0	0	0	0	0
Q9UNF1	2	1	0	0	1	1	1	0	0	2
Q9UNM6	0	0	0	0	0	0	0	0	0	1
Q9UNS2	0	0	0	0	0	0	0	0	0	0
Q9UPQ0	2	3	1	0	0	0	0	0	0	1
Q9UQ13	0	0	0	0	0	0	0	0	0	0
Q9UQ35	31	29	1	18	1	18	3	1	0	1
Q9UQ80	0	0	0	0	0	0	0	0	0	0
Q9UQE7	3	1	1	0	0	0	0	0	0	0
Q9Y221
Q9Y224	0	1	0	0	0	0	0	0	0	0
Q9Y230	0	0	0	0	0	0	0	0	0	0
Q9Y262	0	0	0	0	0	0	0	0	0	0
Q9Y263
Q9Y265	0	0	0	0	0	0	0	0	0	0
Q9Y266	0	0	0	0	0	0	0	0	0	0
Q9Y277
Q9Y285	0	0	0	0	0	0	0	0	0	0
Q9Y295	0	0	0	0	0	0	0	0	0	0
Q9Y2S7	0	0	0	0	0	0	0	0	0	0
Q9Y2T2	0	0	0	0	0	0	0	0	0	0
Q9Y2W1	21	10	5	7	1	1	0	2	0	2
Q9Y2W2	3	5	0	0	0	0	1	0	0	0
Q9Y2X3	2	0	0	0	0	0	0	0	0	0
Q9Y2Z4
Q9Y314	3	0	0	0	0	0	0	1	0	1
Q9Y320	0	1	0	0	0	0	0	0	0	0
Q9Y383	0	1	0	0	0	0	0	0	0	0
Q9Y399	0	0	0	0	0	0	0	0	0	0
Q9Y3A5	0	0	0	0	0	0	0	0	0	0
Q9Y3C8	0	0	0	0	0	0	0	0	0	0
Q9Y3D9	0	0	0	0	0	0	0	0	0	0
Q9Y3E5
Q9Y3F4	0	0	0	0	0	0	0	0	0	0
Q9Y3I0
Q9Y3T9	2	1	0	0	0	0	0	0	0	0
Q9Y3U8	1	1	0	1	0	1	0	0	0	0
Q9Y3Y2	23	17	14	7	5	1	0	9	0	1
Q9Y490	1	0	0	0	0	0	0	0	0	2
Q9Y4L1	0	0	0	0	0	0	0	0	0	0
Q9Y4R8	0	0	0	0	0	0	0	0	0	0
Q9Y4W6	0	0	0	0	0	0	0	0	0	0
Q9Y5B9	3	2	2	0	0	0	0	0	0	0
Q9Y5M8	1	1	1	0	1	0	0	0	0	0
Q9Y606	0	2	0	0	0	0	0	0	0	0
Q9Y617	0	0	0	0	0	0	0	0	0	0
Q9Y678	0	0	0	0	0	0	0	0	0	0
Q9Y697	1	0	0	0	0	0	0	0	0	0
Q9Y6A4	0	0	0	0	0	0	0	0	0	1
Q9Y6E2	0	0	0	0	0	0	0	0	0	1
Q9Y6N5
Q9Y6Y8	0	0	0	0	0	0	0	0	0	1
