# Supplementary material for: Hsp90α forms condensate engaging client proteins with RG motif repeats
Source: PubMed Central journal article supplement — Chem Sci. 2024 Jun 10;15(27):10508–18. doi: 10.1039/d4sc00267a (PMC11234873; doi:10.1039/d4sc00267a), 2024-06-10
Supplement: SC-015-D4SC00267A-s005.pdf [file SC-015-D4SC00267A-s005.pdf]

## SUPPLEMENTAL INFORMATION

### **Hsp90 $\alpha$ forms condensate engaging client proteins with RG motif repeats**

Jiaojiao Hu<sup>1,2</sup>, Hui Dong<sup>1,2</sup>, Yichen Li<sup>3</sup>, Jinge Gu<sup>1,2</sup>, Liang Yang<sup>4,5</sup>, Chenfang Si<sup>1</sup>, Yaoyang Zhang<sup>1</sup>, Tingting Li<sup>4,5</sup>, Dan Li<sup>3,6\*</sup>, Cong Liu<sup>1,2\*</sup>

<sup>1</sup>Interdisciplinary Research Center on Biology and Chemistry, Shanghai Institute of Organic Chemistry, Chinese Academy of Sciences, Shanghai 201210, China

<sup>2</sup>State Key Laboratory of Chemical Biology, Shanghai Institute of Organic Chemistry, Chinese Academy of Sciences, Shanghai, 200032, China

<sup>3</sup>Bio-X Institutes, Key Laboratory for the Genetics of Developmental and Neuropsychiatric Disorders, Ministry of Education, Shanghai Jiao Tong University, Shanghai 200240, China

<sup>4</sup>Department of Biomedical Informatics, School of Basic Medical Sciences, Peking University Health Science Center, Beijing 100191, China

<sup>5</sup>Key Laboratory for Neuroscience, Ministry of Education/National Health Commission of China, Peking University, Beijing 100191, China

<sup>6</sup>Zhangjiang Institute for Advanced Study, Shanghai Jiao Tong University, Shanghai 200240, China

\*To whom correspondence should be addressed. E-mails: [hujj@sioc.ac.cn](mailto:hujj@sioc.ac.cn), [lidan2017@sjtu.edu.cn](mailto:lidan2017@sjtu.edu.cn) and [liulab@sioc.ac.cn](mailto:liulab@sioc.ac.cn)

**a**

|          | 1                                              | 2                                                   | 3                                                     | 4                                                     | 5                                                      | 6                                                      | 7                                                      | 8                                                      | 9                                                     | 10                                                     | 11                       | 12                                                 |
|----------|------------------------------------------------|-----------------------------------------------------|-------------------------------------------------------|-------------------------------------------------------|--------------------------------------------------------|--------------------------------------------------------|--------------------------------------------------------|--------------------------------------------------------|-------------------------------------------------------|--------------------------------------------------------|--------------------------|----------------------------------------------------|
| <b>A</b> | 0.1M Citric acid<br>pH 3.5                     | 0.1M Citric acid<br>pH 3.5,<br>50% (w/v)<br>PEG 500 | 0.1M Citric acid<br>pH 3.5,<br>20% (w/v)<br>PEG 3,350 | 0.1M Citric acid<br>pH 3.5,<br>20% (w/v)<br>PEG 8,000 | 0.1M Citric acid<br>pH 3.5,<br>20% (w/v)<br>Ficoll 400 | 0.1M Citric acid<br>pH 3.5,<br>20% (w/v) Dextran<br>10 | 0.1M Citric acid<br>pH 3.5,<br>20% (w/v) Dextran<br>40 | 0.1M Citric acid<br>pH 3.5,<br>20% (w/v) Dextran<br>70 | 0.1M Citric acid<br>pH 3.5,<br>3 M Sodium<br>chloride | 0.1M Citric acid<br>pH 3.5,<br>3 M Ammonium<br>sulfate | 50 $\mu$ M CR7           | 50 $\mu$ M CR20                                    |
| <b>B</b> | 0.1M Citric acid<br>pH 4.5                     | 0.1M Citric acid<br>pH 4.5,<br>50% (w/v)<br>PEG 500 | 0.1M Citric acid<br>pH 4.5,<br>20% (w/v)<br>PEG 3,350 | 0.1M Citric acid<br>pH 4.5,<br>20% (w/v)<br>PEG 8,000 | 0.1M Citric acid<br>pH 4.5,<br>20% (w/v)<br>Ficoll 400 | 0.1M Citric acid<br>pH 4.5,<br>20% (w/v) Dextran<br>10 | 0.1M Citric acid<br>pH 4.5,<br>20% (w/v) Dextran<br>40 | 0.1M Citric acid<br>pH 4.5,<br>20% (w/v) Dextran<br>70 | 0.1M Citric acid<br>pH 4.5,<br>3 M Sodium<br>chloride | 0.1M Citric acid<br>pH 4.5,<br>3 M Ammonium<br>sulfate | 200 $\mu$ M CR7          | 200 $\mu$ M CR20                                   |
| <b>C</b> | 0.1M Bis-Tris<br>pH 5.5                        | 0.1M Bis-Tris<br>pH 5.5,<br>50% (v/v)<br>PEG 500    | 0.1M Bis-Tris<br>pH 5.5,<br>20% (w/v)<br>PEG 3,350    | 0.1M Bis-Tris<br>pH 5.5,<br>20% (w/v)<br>PEG 8,000    | 0.1M Bis-Tris<br>pH 5.5,<br>20% (w/v)<br>Ficoll 400    | 0.1M Bis-Tris<br>pH 5.5,<br>20% (w/v) Dextran<br>10    | 0.1M Bis-Tris<br>pH 5.5,<br>20% (w/v) Dextran<br>40    | 0.1M Bis-Tris<br>pH 5.5,<br>20% (w/v) Dextran<br>70    | 0.1M Bis-Tris<br>pH 5.5,<br>3 M Sodium<br>chloride    | 0.1M Bis-Tris<br>pH 5.5,<br>3 M Ammonium<br>sulfate    | 1000 $\mu$ M CR7         | 1000 $\mu$ M CR20                                  |
| <b>D</b> | 0.1M Bis-Tris<br>pH 6.5                        | 0.1M Bis-Tris<br>pH 6.5,<br>50% (v/v)<br>PEG 500    | 0.1M Bis-Tris<br>pH 6.5,<br>20% (w/v)<br>PEG 3,350    | 0.1M Bis-Tris<br>pH 6.5,<br>20% (w/v)<br>PEG 8,000    | 0.1M Bis-Tris<br>pH 6.5,<br>20% (w/v)<br>Ficoll 400    | 0.1M Bis-Tris<br>pH 6.5,<br>20% (w/v) Dextran<br>10    | 0.1M Bis-Tris<br>pH 6.5,<br>20% (w/v) Dextran<br>40    | 0.1M Bis-Tris<br>pH 6.5,<br>20% (w/v) Dextran<br>70    | 0.1M Bis-Tris<br>pH 6.5,<br>3 M Sodium<br>chloride    | 0.1M Bis-Tris<br>pH 6.5,<br>3 M Ammonium<br>sulfate    | 200 $\mu$ M<br>Heparin   | 200 $\mu$ M<br>Heparin 20% (w/v)<br>PEG 3,350      |
| <b>E</b> | 0.1M HEPES<br>pH 7.5                           | 0.1M HEPES<br>pH 7.5,<br>50% (v/v)<br>PEG 500       | 0.1M HEPES<br>pH 7.5,<br>20% (w/v)<br>PEG 3,350       | 0.1M HEPES<br>pH 7.5,<br>20% (w/v)<br>PEG 8,000       | 0.1M HEPES<br>pH 7.5,<br>20% (w/v)<br>Ficoll 400       | 0.1M HEPES<br>pH 7.5,<br>20% (w/v) Dextran<br>10       | 0.1M HEPES<br>pH 7.5,<br>20% (w/v) Dextran<br>40       | 0.1M HEPES<br>pH 7.5,<br>20% (w/v) Dextran<br>70       | 0.1M HEPES<br>pH 7.5,<br>3 M Sodium<br>chloride       | 0.1M HEPES<br>pH 7.5,<br>3 M Ammonium<br>sulfate       | 1000 $\mu$ M Heparin     | 1000 $\mu$ M Heparin<br>10% (w/v)<br>PEG 3,350     |
| <b>F</b> | 0.1M Tris<br>pH 8.5                            | 0.1M Tris<br>pH 8.5,<br>50% (v/v)<br>PEG 500        | 0.1M Tris<br>pH 8.5,<br>20% (w/v)<br>PEG 3,350        | 0.1M Tris<br>pH 8.5,<br>20% (w/v)<br>PEG 8,000        | 0.1M Tris<br>pH 8.5,<br>20% (w/v)<br>Ficoll 400        | 0.1M Tris<br>pH 8.5,<br>20% (w/v) Dextran<br>10        | 0.1M Tris<br>pH 8.5,<br>20% (w/v) Dextran<br>40        | 0.1M Tris<br>pH 8.5,<br>20% (w/v) Dextran<br>70        | 0.1M Tris<br>pH 8.5,<br>3 M Sodium<br>chloride        | 0.1M Tris<br>pH 8.5,<br>3 M Ammonium<br>sulfate        | 2 $\mu$ g/ $\mu$ l PolyU | 2 $\mu$ g/ $\mu$ l PolyU<br>20% (w/v)<br>PEG 3,350 |
| <b>G</b> | 0.1M<br>Zinc acetate                           | 0.1M<br>Calcium chloride                            | 0.1M<br>Magnesium acetate                             | 0.1M<br>Magnesium sulfate                             | 0.1M<br>Manganese chloride                             | 0.1M<br>Sodium chloride                                | 0.1M<br>Potassium acetate                              | 0.1M<br>Sodium acetate                                 | 0.1M<br>Ammonium sulfate                              | 0.1M<br>Lithium chloride                               | 5% (w/v)<br>PEG 3,350    | 12% (w/v)<br>PEG 3,350                             |
| <b>H</b> | 0.1M<br>Zinc acetate<br>20% (w/v)<br>PEG 3,350 | 0.1M<br>Calcium chloride<br>20% (w/v)<br>PEG 3,350  | 0.1M<br>Magnesium acetate<br>20% (w/v)<br>PEG 3,350   | 0.1M<br>Magnesium sulfate<br>20% (w/v)<br>PEG 3,350   | 0.1M<br>Manganese chloride<br>20% (w/v)<br>PEG 3,350   | 0.1M<br>Sodium chloride<br>20% (w/v)<br>PEG 3,350      | 0.1M<br>Potassium acetate<br>20% (w/v)<br>PEG 3,350    | 0.1M<br>Sodium acetate<br>20% (w/v)<br>PEG 3,350       | 0.1M<br>Ammonium sulfate<br>20% (w/v)<br>PEG 3,350    | 0.1M<br>Lithium chloride<br>20% (w/v)<br>PEG 3,350     | 18% (w/v)<br>PEG 3,350   | 25% (w/v)<br>PEG 3,350                             |

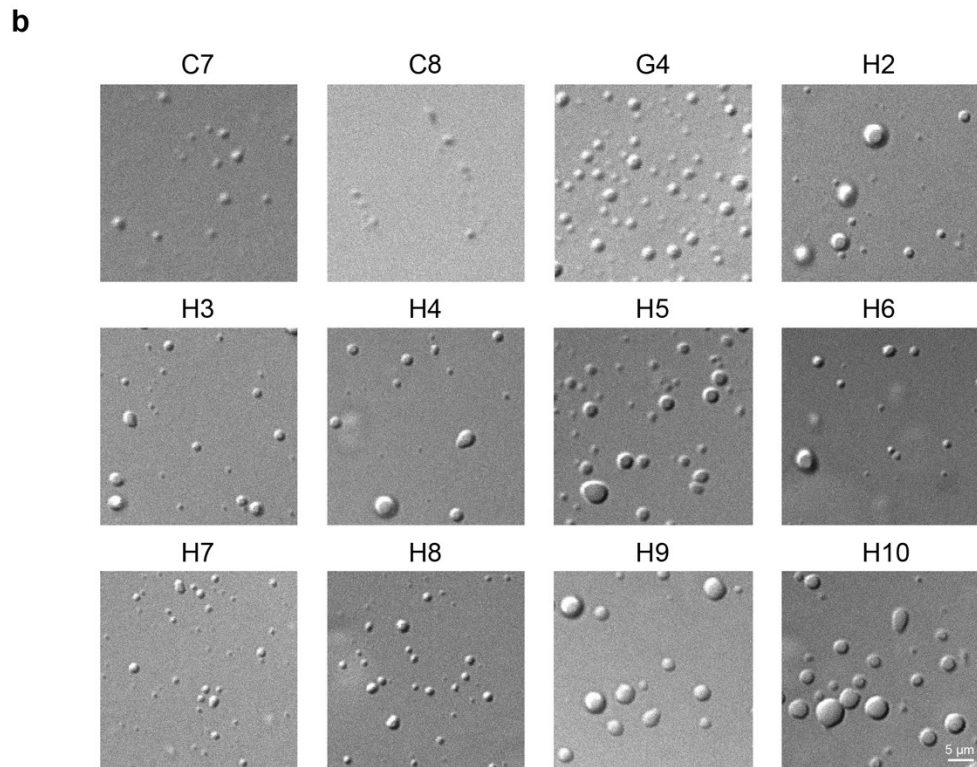

**Figure S1. The conditions of HiPPS and Hsp90 $\alpha$  LLPS in HiPPS profiling.**  
 (a) Conditions included in HiPPS profiles.  
 (b) DIC images for wells C7, C8, G4, and H2-H9.

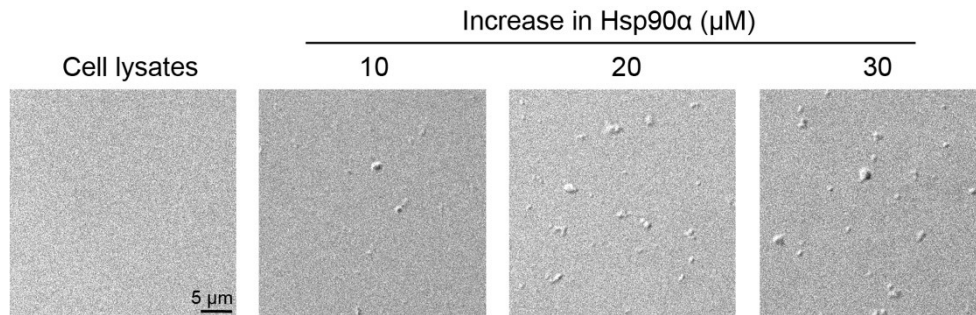

**Figure S2. Addition of Hsp90α in cell lysates to induce Hsp90α granules.**

DIC images of varying concentrations of Hsp90α LLPS in cell lysates (1 mg/ mL) after induction with 10% PEG 8,000 for 30 min.

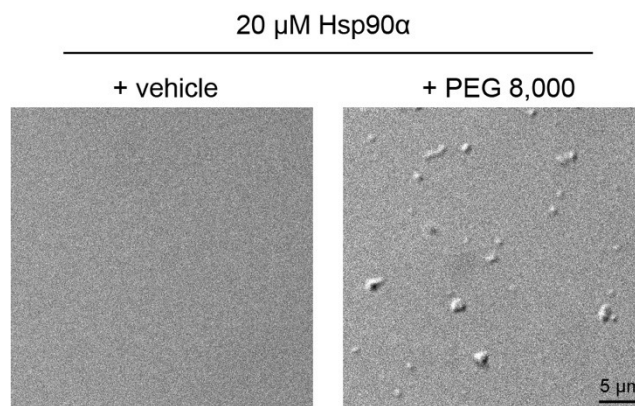

**Figure S3. The formation of Hsp90α condensation in cell lysates.**

DIC images of 20 μM Hsp90α LLPS in cell lysates (1 mg/ mL) with or without the addition of 10% PEG 8,000.

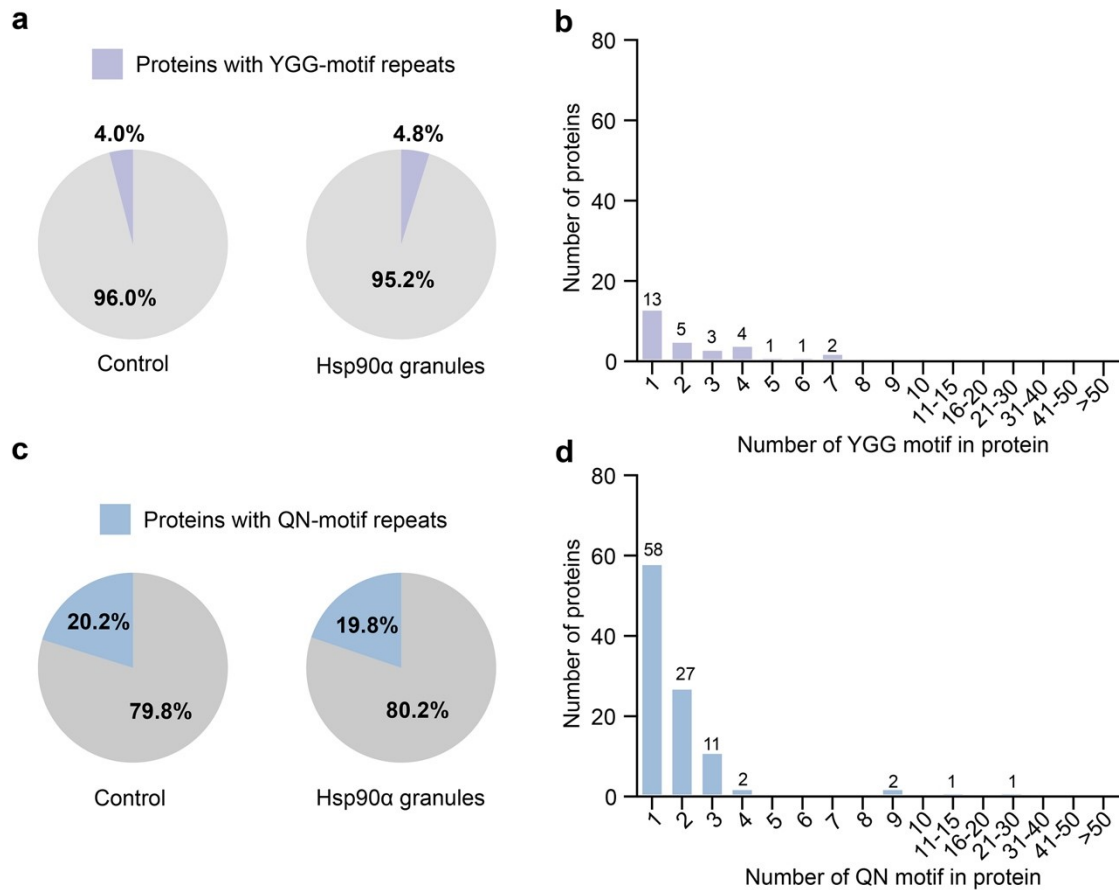

**Figure S4. Analysis of YGG and QN motif in proteins from Hsp90α granules and control group.**

(a) Percentage of YGG motif-containing proteins within the Hsp90α granules compared to percentage of YGG motif-containing proteins in the control.

(b) The number of YGG motifs in the client proteins of Hsp90α granules.

(c) Percentage of QN motif-containing proteins within the Hsp90α granules compared to percentage of QN motif-containing proteins in the control.

(d) The number of QN motifs in the client proteins of Hsp90α granules.

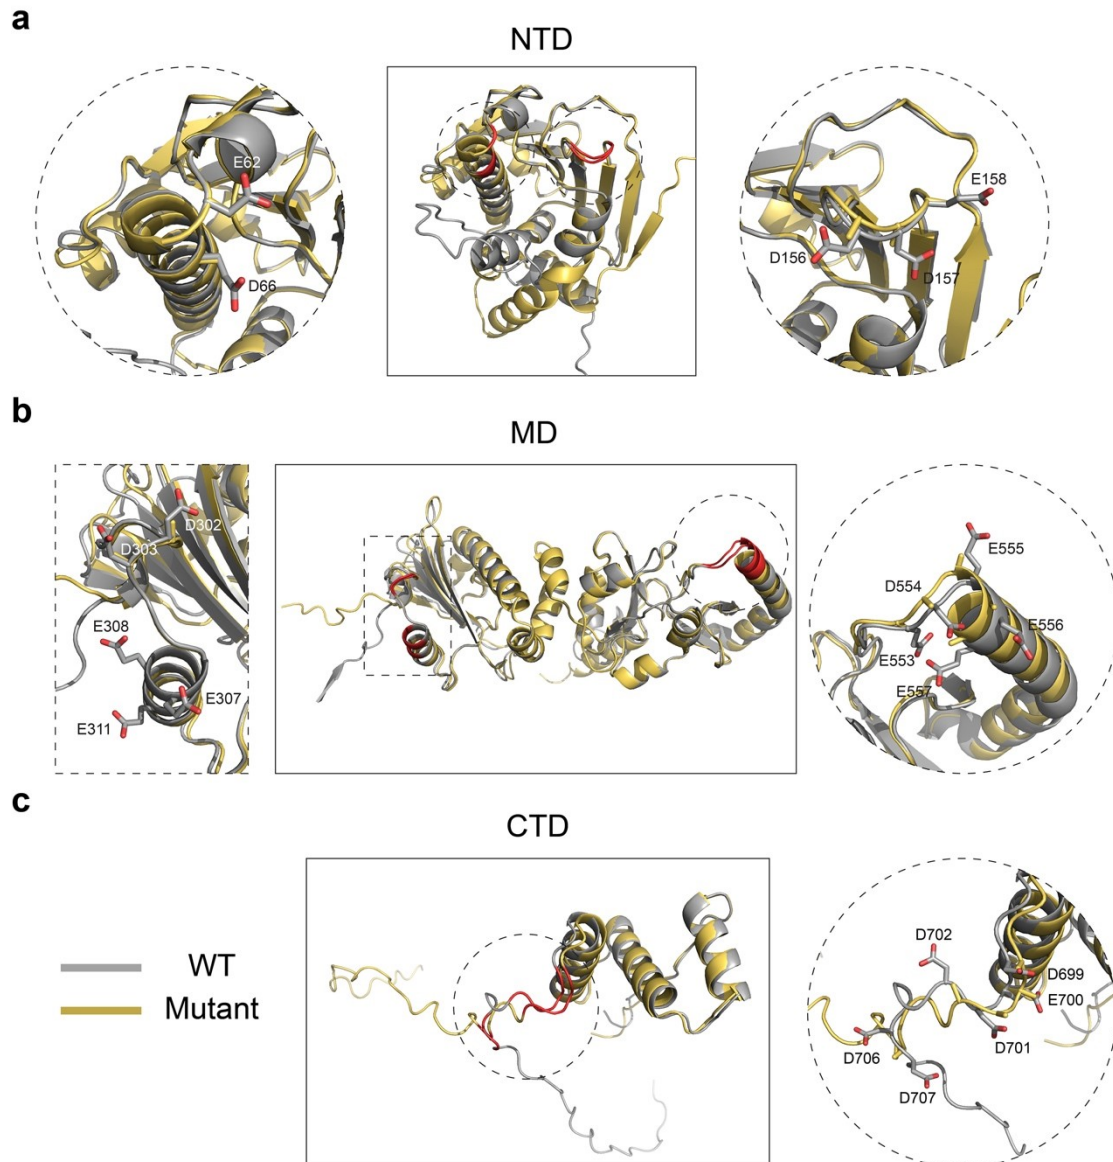

**Figure S5. Structure comparison of NTD, MD, CTD and mutants using AlphaFold2.** Comparison of NTD (a), MD (b) and CTD (c) constructs prediction models. WT constructs are colored with gray, while mutant constructs are colored with yellow. The mutating sites are colored with red with zoom-in views and residues labeled.

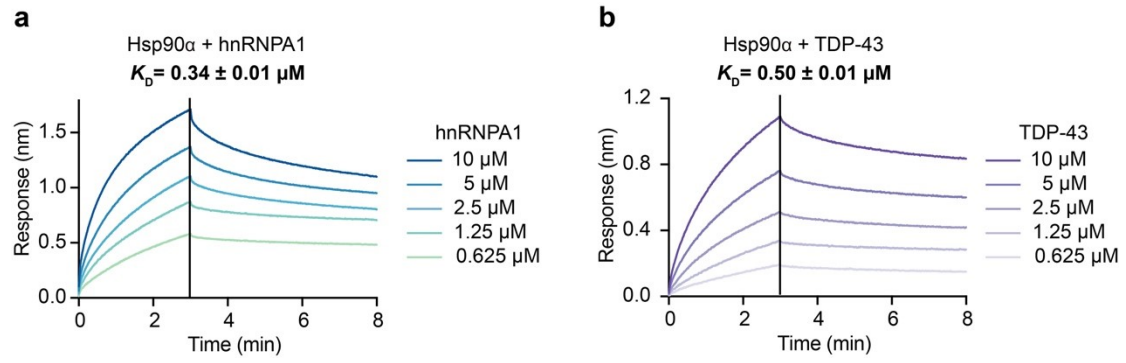

**Figure S6. The binding affinities of hnRNPA1 and TDP-43 to Hsp90α measured by the BLI assay.**

The binding affinities of Hsp90α to hnRNPA1 (a) and TDP-43 (b) were measured by BLI. The association and dissociation profiles are divided by a vertical black line.

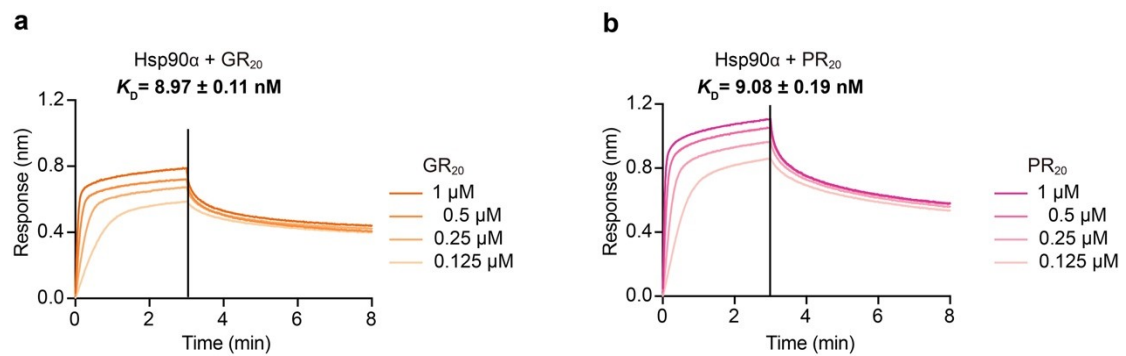

**Figure S7. The binding affinities of GR<sub>20</sub> and PR<sub>20</sub> to Hsp90α measured by the BLI assay.**

The binding affinities of Hsp90α to GR<sub>20</sub> (a) and PR<sub>20</sub> (b) were measured by BLI. The association and dissociation profiles are divided by a vertical black line.
